# Supplementary material for: Regulatory divergence in Drosophila revealed by mRNA-seq
Source: HighWire-hosted journal article supplement (doi:10.1101/gr.102491.109), 2010-03-30
Supplement: Supp_TableS2_Addtl_Format.xlsx [file Supp_TableS2_Addtl_Format.xlsx]

## Sheet: Sheet1
Table S2. This table summarizes the read-hit numbers for each gene from the hybrid(Hyb) and mixed parental(Par) samples. Numbers corresponding to the D. melanogaster "M" and D. sechellia "S" alleles are shown. The read-hit values for the parental D. melanogaster allele (Par_M) were normalized(Norm) as described in the Materials and Methods. Zero read-hit value genes were adjusted (Adj) by adding …
Gene	Hyb_M_Hits	Hyb_M_Hits_adj	Hyb_S_Hits	Hyb_S_Hits_adj	Hyb_Bin_pvalues	Hyb_Bin_qvalues	Hyb_total	Par_M_Hits	Par_S_Hits	Par_S_Hits_adj	Par_M_Hits_Norm	Par_M_Hits_Norm_adj	Par_Bin_pvalues	Par_Bin_qvalues	FET_pvalues	FET_qvalues	Significant_Cis	Significant_Trans	Log2_Hyb_MS	Log2_Par_MS	Cis_Mag	Trans_Mag	Pct_cis
CG8066	561	561	3212	3212	0	0	3773	271	1429	1429	250	250	1.68e-200	8.25e-200	1	0.246323	1	0	-2.5174	-2.51501	2.5174	0.0023933	99.905
CG31039	2028	2028	3	3	0	0	2031	2058	3	3	1893	1893	0	0	1	0.246323	1	0	9.40088	9.3015	9.40088	0.0993832	98.9539
CG31362	2000	2000	35	35	0	0	2035	1597	27	27	1469	1469	0	0	0.897094	0.227481	1	0	5.8365	5.76573	5.8365	0.0707701	98.802
CG18858	75	75	1742	1742	0	0	1817	42	871	871	39	39	1.31e-205	6.67e-205	0.839755	0.215141	1	0	-4.53771	-4.48113	4.53771	0.0565835	98.7684
CG33936	4925	4925	1190	1190	0	0	6115	2742	621	621	2523	2523	5.96e-270	4.08e-269	0.739976	0.193454	1	0	2.04916	2.02248	2.04916	0.0266871	98.7144
CG17571	3480	3480	2	2	0	0	3482	1379	0	1	1269	1269	0	0	1	0.246323	1	0	10.7649	10.3095	10.7649	0.455395	95.9413
CG18211	3757	3757	136	136	0	0	3893	3682	102	102	3387	3387	0	0	0.186794	0.0569728	1	0	4.7879	5.05337	4.7879	0.265464	94.7468
CG14245	2453	2453	494	494	1.552595e-310	0	2947	981	166	166	903	903	3.7e-123	1.05e-122	0.360428	0.102765	1	0	2.31196	2.44354	2.31196	0.131578	94.6153
CG14246	2453	2453	494	494	1.552595e-310	0	2947	981	166	166	903	903	3.7e-123	1.05e-122	0.360428	0.102765	1	0	2.31196	2.44354	2.31196	0.131578	94.6153
CG5932	2890	2890	45	45	0	0	2935	1433	27	27	1319	1319	0	0	0.305428	0.0888053	1	0	6.005	5.61034	6.005	0.394659	93.8331
CG3422	3958	3958	0	1	0	0	3959	2431	0	1	2237	2237	0	0	1	0.246323	1	0	11.9506	11.1273	11.9506	0.823206	93.5555
CG17240	1754	1754	5	5	0	0	1759	677	1	1	623	623	1.8e-185	8.1e-185	1	0.246323	1	0	8.4545	9.28309	8.4545	0.828583	91.0743
CG9466	2698	2698	5	5	0	0	2703	3763	12	12	3462	3462	0	0	0.328266	0.0946608	1	0	9.07575	8.17243	9.07575	0.903319	90.9479
CG6998	7580	7580	3630	3630	4.665005e-311	0	11210	4808	2318	2318	4423	4423	3.03e-147	1.03e-146	0.00594783	0.00235046	1	1	1.06223	0.932145	1.06223	0.130084	89.0898
CG33346	29	29	3035	3035	0	0	3064	33	1833	1833	31	31	0	0	0.0315915	0.0110821	1	0	-6.7095	-5.88579	6.7095	0.823705	89.0657
CG13324	79	79	2565	2565	0	0	2644	45	2104	2104	42	42	0	0	0.0260611	0.00929212	1	0	-5.02096	-5.6466	5.02096	0.625639	88.9201
CG9540	2946	2946	8	8	0	0	2954	753	4	4	693	693	2.98e-200	1.46e-199	0.259888	0.0769032	1	0	8.52454	7.43671	8.52454	1.08783	88.683
CG18681	5297	5297	20	20	0	0	5317	5160	46	46	4747	4747	0	0	0.00028748	0.000135586	1	1	8.04903	6.68924	8.04903	1.35979	85.5477
CG9976	2624	2624	10	10	0	0	2634	755	1	1	695	695	4.24e-207	2.18e-206	0.477132	0.13162	1	0	8.03562	9.44087	8.03562	1.40525	85.1153
CG33104	457	457	2453	2453	0	0	2910	291	1036	1036	268	268	9.85e-107	2.41e-106	0.000144457	7.03e-05	1	1	-2.42428	-1.95072	2.42428	0.473562	83.6581
CG3540	1436	1436	67	67	0	0	1503	547	45	45	504	504	2.98e-99	6.77e-99	0.00140675	0.000606067	1	1	4.42175	3.48543	4.42175	0.936324	82.525
CG4740	203	203	2108	2108	0	0	2311	273	1580	1580	252	252	9.33e-235	5.36e-234	5.15407e-07	3.27e-07	1	1	-3.37632	-2.64843	3.37632	0.727894	82.2647
CG9081	836	836	3335	3335	0	0	4171	122	611	611	113	113	1.72e-83	3.23e-83	0.00506435	0.00202513	1	1	-1.99611	-2.43485	1.99611	0.438738	81.9809
CG17752	2239	2239	363	363	0	0	2602	1078	105	105	992	992	1.18e-181	5.2e-181	0.000224711	0.000107382	1	1	2.62481	3.23995	2.62481	0.615138	81.014
CG6910	3284	3284	855	855	0	0	4139	2206	730	730	2030	2030	2.26e-140	7.25e-140	2.7688e-08	1.99e-08	1	1	1.94146	1.47551	1.94146	0.465946	80.6453
CG5804	1313	1313	11	11	0	0	1324	913	2	2	840	840	2.42e-248	1.49e-247	0.0933197	0.0301986	1	0	6.89922	8.71425	6.89922	1.81503	79.1717
CG12385	2903	2903	96	96	0	0	2999	1260	97	97	1159	1159	1.63e-231	9.18e-231	7.06389e-10	5.78e-10	1	1	4.91837	3.57875	4.91837	1.33961	78.5935
CG9515	5631	5631	572	572	0	0	6203	886	173	173	815	815	3.59e-100	8.27e-100	1.02176e-13	1.11e-13	1	1	3.2993	2.23603	3.2993	1.06328	75.6274
CG6300	225	225	2565	2565	0	0	2790	91	2147	2147	84	84	0	0	1.71831e-10	1.49e-10	1	1	-3.51096	-4.67579	3.51096	1.16483	75.0881
CG13749	18	18	1495	1495	0	0	1513	3	1086	1086	3	3	6.491034e-320	5.385365e-319	0.0126386	0.00475859	1	1	-6.376	-8.49985	6.376	2.12384	75.0132
CG3397	1558	1558	70	70	0	0	1628	326	39	39	300	300	4.93e-51	5.71e-51	1.43579e-06	8.74e-07	1	1	4.4762	2.94342	4.4762	1.53278	74.4918
CG13044	3872	3872	252	252	0	0	4124	276	6	6	254	254	4.48e-67	6.8e-67	0.00912061	0.00351378	1	1	3.94158	5.40372	3.94158	1.46214	72.942
CG33082	2458	2458	468	468	0	0	2926	689	236	236	634	634	8.69e-43	8.45e-43	8.5351e-13	8.68e-13	1	1	2.3929	1.4257	2.3929	0.967209	71.215
CG12800	1363	1363	3	3	0	0	1366	282	8	8	260	260	2.58e-66	3.86e-66	4.9979e-05	2.57e-05	1	1	8.82761	5.02237	8.82761	3.80524	69.8782
CG6357	3595	3595	749	749	0	0	4344	1035	399	399	953	953	1.37e-52	1.63e-52	2.11109e-21	3.52e-21	1	1	2.26295	1.25609	2.26295	1.00687	69.2073
CG8690	5116	5116	379	379	0	0	5495	425	94	94	391	391	4.47e-44	4.44e-44	1.38554e-17	1.89e-17	1	1	3.75475	2.05644	3.75475	1.69831	68.8558
CG2060	4235	4235	1401	1401	0	0	5636	1162	588	588	1069	1069	1.57e-32	1.22e-32	5.67852e-17	7.42e-17	1	1	1.59591	0.862374	1.59591	0.733531	68.5104
CG1634	6082	6082	2536	2536	0	0	8618	2113	1236	1236	1944	1944	2.41e-36	2.05e-36	4.95186e-22	8.54e-22	1	1	1.26199	0.653349	1.26199	0.608642	67.4633
CG18292	472	472	5512	5512	0	0	5984	409	1224	1224	377	377	2.44e-104	5.82e-104	6.14437e-60	3.34e-59	1	1	-3.54572	-1.69897	3.54572	1.84675	65.7532
CG11459	3313	3313	533	533	0	0	3846	1505	86	86	1385	1385	2.78e-302	2.12e-301	8.34168e-18	1.15e-17	1	1	2.63593	4.00941	2.63593	1.37347	65.7437
CG11889	2482	2482	168	168	0	0	2650	779	198	198	717	717	1.14e-69	1.79e-69	8.16667e-35	2.3e-34	1	1	3.88497	1.85647	3.88497	2.0285	65.697
CG17534	5674	5674	1338	1338	0	0	7012	1024	480	480	942	942	5.82e-35	4.81e-35	7.10729e-32	1.83e-31	1	1	2.08429	0.972693	2.08429	1.1116	65.2179
CG3301	1383	1383	5032	5032	0	0	6415	320	2185	2185	295	295	0	0	2.93191e-27	6.29e-27	1	1	-1.86333	-2.88885	1.86333	1.02552	64.5009
CG12505	2042	2042	8761	8761	0	0	10803	631	5850	5850	581	581	0	0	2.16938e-72	1.46e-71	1	1	-2.10111	-3.33183	2.10111	1.23071	63.0619
CG2650	3692	3692	1087	1087	0	0	4779	176	101	101	162	162	0.000203269	5.19e-05	3.55252e-08	2.53e-08	1	1	1.76405	0.681639	1.76405	1.08241	61.9734
CG4306	535	535	2843	2843	0	0	3378	85	1183	1183	79	79	2.4e-253	1.54e-252	8.69964e-20	1.33e-19	1	1	-2.4098	-3.90445	2.4098	1.49465	61.7193
CG4715	2293	2293	11	11	0	0	2304	1664	331	331	1531	1531	5.18e-184	2.32e-183	1.9651e-106	1.95e-105	1	1	7.70359	2.20957	7.70359	5.49402	58.3711
CG12096	3298	3298	581	581	0	0	3879	595	338	338	548	548	1.74e-12	7.03e-13	2.03413e-49	8.89e-49	1	1	2.50498	0.697153	2.50498	1.80783	58.0823
CG7171	2984	2984	7691	7691	0	0	10675	844	3991	3991	777	777	0	0	1.28626e-57	6.65e-57	1	1	-1.36592	-2.36076	1.36592	0.99484	57.8594
CG3757	218	218	3221	3221	0	0	3439	17	1797	1797	16	16	0	0	2.57527e-24	4.94e-24	1	1	-3.88511	-6.81137	3.88511	2.92627	57.0385
CG8693	4476	4476	843	843	0	0	5319	760	565	565	700	700	0.000162697	4.18e-05	1.23039e-98	1.12e-97	1	1	2.40861	0.309104	2.40861	2.0995	53.4283
CG31681	4029	4029	617	617	0	0	4646	702	863	863	646	646	2.55e-08	8.41e-09	6.4193e-239	1.9e-237	1	1	2.70708	-0.417826	2.70708	3.12491	46.4178
CG31451	2490	2490	521	521	4.73e-306	1.27e-304	3011	971	240	240	894	894	5.19e-89	1.05e-88	0.00458406	0.00184237	1	1	2.25679	1.89724	2.25679	0.35955	86.2575
CG18031	773	773	2993	2993	1.49e-305	3.96e-304	3766	239	1712	1712	220	220	5.02e-286	3.63e-285	1.09412e-18	1.58e-18	1	1	-1.95305	-2.96011	1.95305	1.00706	65.9791
CG6283	1492	1492	4256	4256	4.52e-303	1.19e-301	5748	835	1941	1941	769	769	9.35e-116	2.51e-115	0.0205038	0.00744363	1	0	-1.51225	-1.33574	1.51225	0.176506	89.5482
CG8996	6249	6249	2767	2767	5.94e-302	1.56e-300	9016	2735	1324	1324	2516	2516	1.16e-83	2.19e-83	2.66993e-05	1.42e-05	1	1	1.1753	0.926229	1.1753	0.249074	82.5135
CG4250	1372	1372	85	85	1.22e-299	3.18e-298	1457	1046	18	18	963	963	9.43e-258	6.12e-257	5.47812e-07	3.46e-07	1	1	4.01267	5.74147	4.01267	1.72879	69.8893
CG16905	2238	2238	5428	5428	2.13e-299	5.53e-298	7666	683	3250	3250	629	629	0	0	4.5037e-55	2.19e-54	1	1	-1.27821	-2.36931	1.27821	1.0911	53.9487
CG17524	4409	4409	1612	1612	1.9e-295	4.89e-294	6021	1742	1416	1416	1603	1603	0.000708792	0.000173009	6.45054e-80	4.83e-79	1	1	1.4516	0.178953	1.4516	1.27265	53.2845
CG8534	1750	1750	4592	4592	8.24e-289	2.11e-287	6342	101	798	798	93	93	1.78e-140	5.73e-140	1.67423e-32	4.4e-32	1	1	-1.39177	-3.10109	1.39177	1.70932	44.88
CG31041	951	951	1	1	5.01e-284	1.27e-282	952	167	0	1	154	154	6.83e-45	6.89e-45	0.26054	0.0770682	1	0	9.8933	7.26679	9.8933	2.62651	79.0211
CG16844	10692	10692	6103	6103	5.06e-278	1.28e-276	16795	2183	3147	3147	2008	2008	4.97e-57	6.49e-57	6.5193e-215	1.68e-213	1	1	0.808941	-0.648218	0.808941	1.45716	35.6975
CG7900	29	29	1079	1079	9.04e-277	2.27e-275	1108	8	784	784	8	8	2.87e-220	1.55e-219	0.0116351	0.00440033	1	1	-5.2175	-6.61471	5.2175	1.39721	78.8772
CG9535	2125	2125	5101	5101	2.06e-276	5.13e-275	7226	894	1401	1401	823	823	8.51e-35	7.01e-35	2.3567e-11	2.16e-11	1	1	-1.26332	-0.767493	1.26332	0.495825	71.8144
CG31673	1879	1879	307	307	8.56e-275	2.12e-273	2186	527	93	93	485	485	6.2e-65	9.1e-65	0.231325	0.069185	1	0	2.61365	2.38268	2.61365	0.230972	91.8804
CG12512	1367	1367	3874	3874	1.64e-273	4.03e-272	5241	721	1509	1509	664	664	3.56e-75	6.07e-75	9.93986e-05	4.94e-05	1	1	-1.50281	-1.18434	1.50281	0.318473	82.5138
CG33532	157	157	1490	1490	1.47e-272	3.6e-271	1647	81	625	625	75	75	6.87e-109	1.73e-108	0.405687	0.11417	1	0	-3.24648	-3.05889	3.24648	0.187582	94.5376
CG15221	233	233	1681	1681	3.19e-270	7.74e-269	1914	72	1169	1169	67	67	1.16e-260	7.61e-260	1.0081e-10	8.87e-11	1	1	-2.85092	-4.12497	2.85092	1.27405	69.1137
CG8186	6785	6785	3311	3311	3.64e-267	8.79e-266	10096	3025	1825	1825	2783	2783	1.89e-45	1.93e-45	1.39431e-15	1.68e-15	1	1	1.03508	0.608744	1.03508	0.426337	70.8272
CG3739	4116	4116	7910	7910	1.26e-266	3.01e-265	12026	936	4551	4551	861	861	0	0	3.1504e-145	4.63e-144	1	1	-0.942435	-2.4021	0.942435	1.45966	39.2338
CG3819	279	279	1769	1769	2.12e-264	5.05e-263	2048	483	2342	2342	445	445	0	0	0.0248795	0.00891095	1	0	-2.6646	-2.39586	2.6646	0.268733	90.8386
CG7629	17	17	977	977	2.69e-263	6.37e-262	994	122	16	16	113	113	3.64e-19	1.93e-19	1.0228e-117	1.13e-116	1	1	-5.84475	2.82018	5.84475	8.66493	40.2817
CG3566	1150	1150	59	59	2.98e-263	7.03e-262	1209	551	41	41	507	507	2.97e-103	7.01e-103	0.0344146	0.0120038	1	0	4.28478	3.62829	4.28478	0.656485	86.7142
CG6639	2680	2680	728	728	2.99e-260	7.01e-259	3408	806	153	153	742	742	2.05e-93	4.42e-93	0.00452619	0.00182031	1	1	1.88022	2.27789	1.88022	0.397665	82.5424
CG33957	9948	9948	5672	5672	1.07e-259	2.5e-258	15620	2813	1427	1427	2588	2588	6.53e-76	1.12e-75	0.366961	0.104424	1	0	0.810549	0.858852	0.810549	0.0483033	94.3758
CG3481	58179	58179	47063	47063	9.6e-258	2.22e-256	105242	12964	13312	13312	11925	11925	2.62e-18	1.34e-18	1.8676e-116	2.04e-115	1	1	0.305905	-0.158738	0.305905	0.464643	39.6997
CG8345	2526	2526	661	661	7.41e-255	1.71e-253	3187	861	656	656	792	792	0.000385093	9.6e-05	1.07677e-63	6.32e-63	1	1	1.93413	0.271805	1.93413	1.66233	53.7788
CG10652	4080	4080	1565	1565	3.2e-254	7.32e-253	5645	4538	1219	1219	4175	4175	0	0	6.16965e-10	5.09e-10	1	1	1.38241	1.77608	1.38241	0.393672	77.8348
CG16749	3598	3598	7079	7079	3.29e-253	7.48e-252	10677	1127	3743	3743	1037	1037	0	0	5.84353e-53	2.76e-52	1	1	-0.97635	-1.85178	0.97635	0.875429	52.725
CG6649	2829	2829	830	830	1.04e-252	2.36e-251	3659	1139	467	467	1048	1048	1.81e-51	2.12e-51	1.27052e-09	1.02e-09	1	1	1.76911	1.16614	1.76911	0.602965	74.5807
CG6295	4037	4037	1557	1557	2.15e-249	4.84e-248	5594	3849	1101	1101	3541	3541	4.01e-295	2.99e-294	2.21428e-06	1.32e-06	1	1	1.37451	1.68534	1.37451	0.310828	81.557
CG8329	850	850	3	3	3.44e-249	7.7e-248	853	492	2	2	453	453	2.23e-132	6.8e-132	1	0.246323	1	0	8.14636	7.82337	8.14636	0.322989	96.1864
CG6906	3966	3966	1521	1521	3.06e-247	6.79e-246	5487	1357	971	971	1249	1249	3.95e-09	1.36e-09	4.15507e-41	1.44e-40	1	1	1.38266	0.36323	1.38266	1.01943	57.5607
CG1743	15686	15686	10336	10336	8.17e-243	1.81e-241	26022	4822	6098	6098	4436	4436	3.81e-59	5.17e-59	4.4117e-219	1.16e-217	1	1	0.6018	-0.459077	0.6018	1.06088	36.1946
CG9463	872	872	11	11	1.88e-241	4.13e-240	883	818	2	2	753	753	3.01e-222	1.64e-221	0.0271026	0.00962396	1	0	6.30875	8.55651	6.30875	2.24775	73.7305
CG3270	4829	4829	8654	8654	4.11e-241	8.98e-240	13483	1134	3096	3096	1044	1044	5.11e-233	2.9e-232	7.07675e-38	2.22e-37	1	1	-0.841643	-1.56828	0.841643	0.726641	53.6665
CG32355	14510	14510	9411	9411	4.35e-240	9.47e-239	23921	3787	3707	3707	3484	3484	0.00884184	0.00195199	9.62517e-75	6.83e-74	1	1	0.624628	-0.0895075	0.624628	0.714135	46.6571
CG18180	885	885	16	16	9.5e-238	2.05e-236	901	2538	8	8	2335	2335	0	0	7.76459e-05	3.91e-05	1	1	5.78953	8.18921	5.78953	2.39967	70.6971
CG13091	8280	8280	4596	4596	2.55e-234	5.47e-233	12876	1520	2416	2416	1399	1399	1.64e-61	2.28e-61	7.1019e-201	1.63e-199	1	1	0.849252	-0.788224	0.849252	1.63748	34.1514
CG11624	1465	1465	3788	3788	4.19e-233	8.97e-232	5253	789	2370	2370	726	726	1.06e-201	5.26e-201	8.32418e-06	4.66e-06	1	1	-1.37054	-1.70685	1.37054	0.33631	80.2964
CG13279	13934	13934	9020	9020	1.86e-232	3.97e-231	22954	2258	3296	3296	2077	2077	1.58e-62	2.23e-62	4.4444e-188	9.57e-187	1	1	0.62741	-0.666215	0.62741	1.29363	32.66
CG2947	145	145	1292	1292	2.7e-230	5.71e-229	1437	186	1006	1006	172	172	9.35e-144	3.08e-143	0.00047242	0.00021669	1	1	-3.15548	-2.54815	3.15548	0.607331	83.8596
CG13043	1781	1781	351	351	1.28e-229	2.69e-228	2132	50	6	6	46	46	1.03e-08	3.47e-09	0.447971	0.124796	1	0	2.34314	2.9386	2.34314	0.595455	79.7368
CG8579	796	796	5	5	4.1e-229	8.57e-228	801	828	2	2	762	762	6.02e-225	3.31e-224	0.452995	0.126053	1	0	7.3147	8.57365	7.3147	1.25895	85.316
CG7113	5749	5749	9720	9720	4.55e-226	9.47e-225	15469	2155	4325	4325	1983	1983	1.55e-195	7.33e-195	8.74808e-16	1.07e-15	1	1	-0.757645	-1.12502	0.757645	0.36737	67.3453
CG10475	667	667	2388	2388	2.04e-225	4.23e-224	3055	748	895	895	689	689	2.5e-07	7.85e-08	6.58508e-52	3.03e-51	1	1	-1.84004	-0.377384	1.84004	1.46266	55.7133
CG12374	15636	15636	10481	10481	1.2e-224	2.48e-223	26117	36029	12742	12742	33140	33140	9.881313e-324	8.399116e-323	1.228e-251	3.72e-250	1	1	0.577095	1.37898	0.577095	0.801887	41.8494
CG5107	4533	4533	1986	1986	4.27e-224	8.74e-223	6519	2108	1950	1950	1939	1939	0.872605	0.147051	1.73071e-88	1.46e-87	1	1	1.1906	-0.00816132	1.1906	1.19876	49.8292
CG10833	4190	4190	1764	1764	3.72e-223	7.59e-222	5954	592	918	918	545	545	1.39e-22	8.12e-23	6.6422e-119	7.45e-118	1	1	1.2481	-0.752238	1.2481	2.00034	38.4215
CG10992	11400	11400	16650	16650	7.09e-217	1.44e-215	28050	4191	7178	7178	3855	3855	6.23e-223	3.4e-222	1.62077e-25	3.29e-25	1	1	-0.546488	-0.896851	0.546488	0.350363	60.9341
CG12324	713	713	1	1	1.66e-212	3.35e-211	714	558	0	1	514	514	9.62e-153	3.44e-152	1	0.246323	1	0	9.47776	9.00562	9.47776	0.472134	95.2549
CG10182	22	22	826	826	1.97e-212	3.95e-211	848	9	1023	1023	9	9	1.55e-289	1.13e-288	0.00543911	0.00216371	1	1	-5.23057	-6.82867	5.23057	1.5981	76.5972
CG5925	8854	8854	5210	5210	1.41e-209	2.81e-208	14064	1629	772	772	1499	1499	2.66e-53	3.22e-53	0.00521379	0.00208116	1	1	0.765046	0.957328	0.765046	0.192282	79.9148
CG13905	268	268	1508	1508	2.63e-209	5.23e-208	1776	329	1107	1107	303	303	1.12e-107	2.8e-107	3.22324e-06	1.89e-06	1	1	-2.49233	-1.86927	2.49233	0.623066	80.0004
CG30344	3963	3963	1681	1681	2.51e-208	4.97e-207	5644	1086	670	670	999	999	7.98e-16	3.7e-16	3.81786e-15	4.49e-15	1	1	1.23727	0.576324	1.23727	0.66095	65.1806
CG9042	38095	38095	30079	30079	2.1e-207	4.14e-206	68174	11605	10083	10083	10675	10675	4.09e-05	1.09e-05	1.77759e-29	4.18e-29	1	1	0.340845	0.0823111	0.340845	0.258534	56.8664
CG4599	5294	5294	2595	2595	9.03e-207	1.77e-205	7889	2860	1298	1298	2631	2631	3.51e-102	8.22e-102	0.884394	0.224688	1	0	1.02862	1.01932	1.02862	0.00930279	99.1037
CG8778	683	683	2318	2318	2.16e-206	4.2e-205	3001	562	954	954	517	517	2.27e-30	1.67e-30	5.05375e-18	7.04e-18	1	1	-1.76292	-0.883825	1.76292	0.879098	66.7263
CG30489	151	151	1207	1207	8.49e-205	1.65e-203	1358	45	841	841	42	42	4.64e-194	2.17e-193	7.77022e-08	5.33e-08	1	1	-2.99881	-4.32364	2.99881	1.32484	69.3583
CG15533	1236	1236	3228	3228	4.31e-202	8.31e-201	4464	289	1026	1026	266	266	1.71e-105	4.12e-105	2.13965e-07	1.41e-07	1	1	-1.38496	-1.94753	1.38496	0.562571	71.1137
CG30104	226	226	1379	1379	9.59e-202	1.84e-200	1605	152	961	961	140	140	4.42e-151	1.56e-150	0.330804	0.0953141	1	0	-2.60923	-2.77911	2.60923	0.169882	93.8872
CG8251	25798	25798	19383	19383	1.07e-200	2.05e-199	45181	7043	8229	8229	6479	6479	2.96e-47	3.16e-47	5.4498e-167	9.62e-166	1	1	0.412467	-0.344946	0.412467	0.757413	35.2572
CG13309	2255	2255	4759	4759	1.33e-200	2.53e-199	7014	876	2603	2603	806	806	1.57e-218	8.42e-218	1.52235e-19	2.3e-19	1	1	-1.07753	-1.69132	1.07753	0.613793	63.7093
CG10247	904	904	54	54	8.13e-200	1.54e-198	958	279	25	25	257	257	1.11e-49	1.24e-49	0.0700603	0.0232259	1	0	4.06529	3.36177	4.06529	0.703523	85.2474
CG8687	33	33	824	824	8.22e-199	1.55e-197	857	54	443	443	50	50	9.71e-80	1.74e-79	9.14378e-06	5.09e-06	1	1	-4.64211	-3.14731	4.64211	1.4948	75.6425
CG13325	1045	1045	102	102	1.4e-197	2.62e-196	1147	198	62	62	183	183	4.8e-15	2.16e-15	5.08622e-11	4.55e-11	1	1	3.35686	1.5615	3.35686	1.79536	65.1537
CG3290	3531	3531	1447	1447	1.63e-197	3.04e-196	4978	1544	1757	1757	1421	1421	2.72e-09	9.44e-10	3.8161e-123	4.46e-122	1	1	1.28701	-0.306208	1.28701	1.59322	44.6843
CG8974	920	920	2680	2680	3.64e-197	6.76e-196	3600	455	1430	1430	419	419	8.33e-129	2.48e-128	0.019993	0.00726636	1	0	-1.54253	-1.77099	1.54253	0.228466	87.0996
CG9280	21672	21672	15891	15891	3.37e-196	6.22e-195	37563	4253	5232	5232	3912	3912	2e-43	1.97e-43	5.3489e-145	7.82e-144	1	1	0.447622	-0.419456	0.447622	0.867079	34.0475
CG2033	9117	9117	13598	13598	1.99e-195	3.66e-194	22715	8894	7241	7241	8181	8181	3.92e-14	1.7e-14	2.3536e-136	3.14e-135	1	1	-0.576763	0.176088	0.576763	0.752852	43.3782
CG6253	11412	11412	7350	7350	1.09e-194	2e-193	18762	9816	3974	3974	9029	9029	4.940656e-324	4.446591e-323	2.19093e-56	1.1e-55	1	1	0.634735	1.18397	0.634735	0.549239	53.6106
CG5246	420	420	1758	1758	7.83e-194	1.43e-192	2178	163	1178	1178	150	150	3.27e-198	1.57e-197	2.92961e-10	2.49e-10	1	1	-2.06547	-2.97331	2.06547	0.907831	69.4673
CG31547	1068	1068	121	121	7.43e-190	1.35e-188	1189	319	159	159	294	294	2.27e-10	8.33e-11	4.05372e-30	9.75e-30	1	1	3.14183	0.886789	3.14183	2.25504	58.2158
CG10353	1956	1956	537	537	2.38e-188	4.29e-187	2493	788	237	237	725	725	4.07e-58	5.42e-58	0.0558388	0.0188292	1	0	1.86491	1.61309	1.86491	0.251818	88.1034
CG7084	4528	4528	2164	2164	1.94e-187	3.49e-186	6692	1467	904	904	1350	1350	5.27e-21	2.94e-21	2.90304e-11	2.64e-11	1	1	1.06517	0.578565	1.06517	0.486609	68.6419
CG32744	8026	8026	4759	4759	1.77e-185	3.16e-184	12785	3665	2289	2289	3372	3372	3.61e-47	3.84e-47	3.72572e-05	1.94e-05	1	1	0.754023	0.558887	0.754023	0.195136	79.4412
CG1678	4520	4520	7697	7697	1.2e-183	2.14e-182	12217	2133	5045	5045	1962	1962	4.54e-307	3.53e-306	1.87452e-37	5.77e-37	1	1	-0.767973	-1.36253	0.767973	0.594556	56.3638
CG13315	11664	11664	7661	7661	1.47e-183	2.61e-182	19325	2038	4853	4853	1875	1875	1.41e-298	1.06e-297	0	0	1	1	0.606458	-1.37199	0.606458	1.97844	23.4615
CG8736	27845	27845	21452	21452	9.15e-183	1.61e-181	49297	2391	3727	3727	2200	2200	2.09e-88	4.19e-88	6.6893e-176	1.26e-174	1	1	0.376306	-0.760511	0.376306	1.13682	24.8695
CG2397	1868	1868	508	508	9.81e-182	1.72e-180	2376	553	155	155	509	509	6.85e-45	6.9e-45	0.287846	0.0841817	1	0	1.87859	1.7154	1.87859	0.163197	92.0072
CG11821	921	921	2585	2585	1.21e-180	2.12e-179	3506	406	1276	1276	374	374	4.48e-115	1.19e-114	0.00530835	0.00211478	1	1	-1.48889	-1.77052	1.48889	0.281627	84.0935
CG6536	60	60	850	850	1.43e-179	2.48e-178	910	37	422	422	35	35	1.86e-85	3.63e-85	0.499037	0.136848	1	0	-3.82443	-3.59182	3.82443	0.232612	94.2665
CG8256	47193	47193	38839	38839	1.15e-178	2e-177	86032	13127	17618	17618	12075	12075	2.88e-228	1.6e-227	0	0	1	1	0.281067	-0.545027	0.281067	0.826094	25.3863
CG9673	2350	2350	4716	4716	1.6e-177	2.75e-176	7066	896	2537	2537	825	825	1.58e-200	7.77e-200	6.21426e-20	9.6e-20	1	1	-1.0049	-1.62066	1.0049	0.615755	62.0059
CG30277	1074	1074	142	142	1.65e-177	2.83e-176	1216	327	46	46	301	301	4.72e-47	5e-47	0.454083	0.126284	1	0	2.91903	2.71006	2.91903	0.208973	93.3193
CG2062	1636	1636	399	399	3.67e-177	6.28e-176	2035	363	205	205	334	334	3.04e-08	1e-08	6.57892e-18	9.11e-18	1	1	2.03571	0.704224	2.03571	1.33149	60.4571
CG32145	1178	1178	2974	2974	1.82e-176	3.1e-175	4152	369	1717	1717	340	340	1.18e-220	6.38e-220	1.37076e-25	2.79e-25	1	1	-1.33607	-2.33628	1.33607	1.00022	57.1876
CG15883	891	891	77	77	2.21e-176	3.75e-175	968	237	40	40	218	218	7.76e-31	5.79e-31	0.000491167	0.000224534	1	1	3.5325	2.44626	3.5325	1.08624	76.4819
CG3209	1706	1706	3776	3776	4.13e-176	6.98e-175	5482	907	2504	2504	835	835	1.28e-191	5.9e-191	7.23022e-10	5.91e-10	1	1	-1.14624	-1.58439	1.14624	0.438145	72.3461
CG4500	456	456	1741	1741	4.72e-176	7.93e-175	2197	39	294	294	36	36	1.79e-51	2.1e-51	1.00427e-05	5.57e-06	1	1	-1.93281	-3.02975	1.93281	1.09694	63.7944
CG10810	3624	3624	1606	1606	1.21e-175	2.03e-174	5230	2419	3116	3116	2226	2226	3.45e-34	2.81e-34	6.9652e-182	1.38e-180	1	1	1.17411	-0.485242	1.17411	1.65935	41.4373
CG14292	6812	6812	10514	10514	2.84e-175	4.73e-174	17326	2604	3960	3960	2396	2396	1.92e-86	3.79e-86	0.0240566	0.00864269	1	0	-0.626161	-0.724873	0.626161	0.0987112	86.3823
CG31326	3767	3767	1706	1706	7.37e-175	1.22e-173	5473	885	788	788	815	815	0.516098	0.0912505	6.89538e-39	2.24e-38	1	1	1.1428	0.0486044	1.1428	1.09419	51.0864
CG3986	582	582	1	1	3.69e-173	6.1e-172	583	211	1	1	195	195	3.92e-57	5.13e-57	0.440146	0.122966	1	0	9.18488	7.60733	9.18488	1.57755	85.3421
CG9259	5728	5728	3115	3115	2.51e-172	4.13e-171	8843	1057	1627	1627	973	973	6.24e-38	5.48e-38	2.8977e-135	3.85e-134	1	1	0.878799	-0.741703	0.878799	1.6205	35.1618
CG33931	25	25	699	699	3.1e-172	5.07e-171	724	24	377	377	23	23	1.18e-83	2.21e-83	0.088976	0.028892	1	0	-4.80529	-4.03486	4.80529	0.770434	86.1824
CG33932	25	25	699	699	3.1e-172	5.07e-171	724	24	377	377	23	23	1.18e-83	2.21e-83	0.088976	0.028892	1	0	-4.80529	-4.03486	4.80529	0.770434	86.1824
CG14963	129	129	1016	1016	2.06e-171	3.35e-170	1145	74	379	379	69	69	6.78e-53	8.14e-53	0.027984	0.00991297	1	0	-2.97746	-2.45753	2.97746	0.519928	85.1338
CG2960	11718	11718	7834	7834	7.66e-171	1.24e-169	19552	11481	4828	4828	10561	10561	4.940656e-324	4.446591e-323	1.49033e-63	8.69e-63	1	1	0.580905	1.12925	0.580905	0.548344	51.4417
CG31300	1603	1603	3577	3577	1.22e-169	1.96e-168	5180	495	1872	1872	456	456	1.08e-202	5.41e-202	2.99284e-25	5.99e-25	1	1	-1.15798	-2.03747	1.15798	0.879499	56.8339
CG3705	6916	6916	4034	4034	8.11e-169	1.3e-167	10950	2089	1868	1868	1922	1922	0.389292	0.070298	6.27065e-41	2.15e-40	1	1	0.777727	0.0411139	0.777727	0.736613	51.3575
CG15021	6565	6565	3769	3769	1.76e-168	2.82e-167	10334	1731	765	765	1593	1593	2.12e-66	3.18e-66	0.000222531	0.000106384	1	1	0.800613	1.05821	0.800613	0.257601	75.657
CG31086	817	817	63	63	4.44e-168	7.07e-167	880	291	47	47	268	268	9.95e-39	8.92e-39	9.57164e-05	4.76e-05	1	1	3.69691	2.5115	3.69691	1.18541	75.7203
CG7088	3585	3585	1625	1625	3.29e-166	5.22e-165	5210	990	693	693	911	911	5.75e-08	1.87e-08	1.8835e-18	2.69e-18	1	1	1.14153	0.394596	1.14153	0.746938	60.4475
CG17109	864	864	2403	2403	7.15e-166	1.13e-164	3267	294	913	913	271	271	1.2e-81	2.2e-81	0.0158711	0.00587652	1	0	-1.47573	-1.75232	1.47573	0.276589	84.2159
CG7461	5969	5969	3340	3340	1.42e-165	2.24e-164	9309	2811	2018	2018	2586	2586	5.92e-17	2.87e-17	1.82418e-19	2.74e-19	1	1	0.837641	0.357796	0.837641	0.479845	63.5787
CG15066	2694	2694	1046	1046	2.77e-165	4.35e-164	3740	1126	2314	2314	1036	1036	1.36e-110	3.46e-110	8.9081e-270	3.08e-268	1	1	1.36487	-1.15936	1.36487	2.52423	35.0947
CG6644	1342	1342	282	282	3.35e-165	5.23e-164	1624	597	157	157	550	550	5.74e-52	6.79e-52	0.00674198	0.00264218	1	1	2.25062	1.80867	2.25062	0.441951	83.5863
CG7529	2399	2399	873	873	9.91e-163	1.54e-161	3272	204	294	294	188	188	1.58e-06	4.69e-07	5.3254e-48	2.27e-47	1	1	1.45838	-0.645083	1.45838	2.10346	40.9445
CG8695	2993	2993	5477	5477	1.16e-162	1.8e-161	8470	749	3110	3110	689	689	0	0	4.88116e-87	4.05e-86	1	1	-0.871794	-2.17434	0.871794	1.30255	40.0947
CG10659	1439	1439	335	335	1.19e-162	1.84e-161	1774	213	63	63	196	196	4.62e-17	2.25e-17	0.0440991	0.0151133	1	0	2.10283	1.63743	2.10283	0.465404	81.8785
CG12070	33264	33264	26645	26645	2.48e-161	3.81e-160	59909	17365	12703	12703	15973	15973	3.29e-83	6.15e-83	0.623167	0.166319	1	0	0.320097	0.330466	0.320097	0.0103692	96.8622
CG9299	6248	6248	3581	3581	2.91e-161	4.45e-160	9829	1221	1474	1474	1124	1124	7.02e-12	2.77e-12	5.04552e-77	3.65e-76	1	1	0.803032	-0.391094	0.803032	1.19413	40.2087
CG11407	1986	1986	4063	4063	3.74e-160	5.7e-159	6049	408	2723	2723	376	376	4.940656e-324	4.446591e-323	6.8184e-111	7.06e-110	1	1	-1.03268	-2.85639	1.03268	1.82371	36.1533
CG4863	4399	4399	7301	7301	4.34e-160	6.6e-159	11700	5663	3615	3615	5209	5209	7.57e-65	1.11e-64	6.5769e-205	1.55e-203	1	1	-0.730918	0.527011	0.730918	1.25793	36.7509
CG34324	17983	17983	23445	23445	5.02e-159	7.59e-158	41428	11391	16440	16440	10478	10478	2.01e-291	1.49e-290	3.00494e-31	7.5e-31	1	1	-0.382647	-0.649847	0.382647	0.2672	58.8826
CG1468	3053	3053	1304	1304	6.65e-159	1e-157	4357	690	564	564	635	635	0.0431761	0.00889027	1.08391e-27	2.38e-27	1	1	1.22728	0.171061	1.22728	1.05622	53.7456
CG4321	1163	1163	213	213	1.48e-158	2.22e-157	1376	202	20	20	186	186	6.53e-35	5.39e-35	0.0271055	0.00962396	1	0	2.44893	3.21723	2.44893	0.768305	76.1191
CG6048	326	326	1401	1401	1.83e-158	2.73e-157	1727	124	927	927	115	115	2.73e-158	1.02e-157	2.96869e-08	2.13e-08	1	1	-2.10351	-3.01094	2.10351	0.907422	69.8624
CG30414	46	46	725	725	5.06e-158	7.55e-157	771	21	159	159	20	20	4.64e-28	3.2e-28	0.021067	0.00763118	1	0	-3.97828	-2.99095	3.97828	0.98732	80.1168
CG32483	899	899	105	105	6.61e-158	9.82e-157	1004	294	36	36	271	271	9.66e-46	9.98e-46	0.528596	0.143989	1	0	3.09793	2.91222	3.09793	0.185708	94.3445
CG16775	2008	2008	659	659	3.08e-157	4.55e-156	2667	272	201	201	251	251	0.0210768	0.00449014	6.47475e-17	8.42e-17	1	1	1.60741	0.320492	1.60741	1.28692	55.5366
CG3484	103627	103627	91826	91826	4.85e-157	7.15e-156	195453	24257	26815	26815	22312	22312	7.59e-92	1.6e-91	1.518e-199	3.42e-198	1	1	0.174425	-0.26522	0.174425	0.439646	28.4047
CG5010	3586	3586	1673	1673	1.04e-156	1.53e-155	5259	1683	807	807	1549	1549	1.74e-53	2.11e-53	0.0366617	0.0127279	1	0	1.09994	0.940697	1.09994	0.159241	87.3536
CG18547	3065	3065	1324	1324	3.14e-156	4.59e-155	4389	533	511	511	491	491	0.548372	0.0966241	1.17859e-34	3.31e-34	1	1	1.21098	-0.0576003	1.21098	1.26858	48.8385
CG17246	28456	28456	22488	22488	2.32e-154	3.37e-153	50944	10849	10113	10113	9980	9980	0.351741	0.0640238	4.05154e-50	1.8e-49	1	1	0.339578	-0.0190993	0.339578	0.358677	48.6324
CG11567	16938	16938	12415	12415	4e-154	5.81e-153	29353	5376	5406	5406	4945	4945	6.12e-06	1.74e-06	4.57185e-68	2.89e-67	1	1	0.448179	-0.128591	0.448179	0.57677	43.727
CG31628	1600	1600	3460	3460	4.43e-154	6.41e-153	5060	1012	1934	1934	931	931	7.93e-80	1.43e-79	0.422456	0.118434	1	0	-1.1127	-1.05473	1.1127	0.0579654	95.0485
CG12013	6252	6252	3640	3640	1.1e-153	1.59e-152	9892	1688	1555	1555	1553	1553	0.985689	0.164488	6.32565e-39	2.06e-38	1	1	0.780379	-0.00185675	0.780379	0.782236	49.9406
CG5902	2336	2336	868	868	1.13e-153	1.63e-152	3204	975	411	411	897	897	5.93e-42	5.7e-42	0.00359175	0.00146272	1	1	1.42827	1.12597	1.42827	0.302304	82.5316
CG9177	4969	4969	2679	2679	2.6e-153	3.72e-152	7648	3808	1556	1556	3503	3503	4.49e-169	1.81e-168	5.76153e-07	3.64e-07	1	1	0.891261	1.17075	0.891261	0.279488	76.1274
CG1461	3811	3811	1848	1848	4.6e-153	6.56e-152	5659	955	1307	1307	879	879	5.1e-20	2.76e-20	1.0018e-105	9.84e-105	1	1	1.0442	-0.572324	1.0442	1.61653	39.245
CG8539	179	179	1060	1060	1.39e-152	1.98e-151	1239	91	321	321	84	84	9.88e-34	7.93e-34	0.00377587	0.00153362	1	1	-2.56603	-1.93411	2.56603	0.631921	80.2398
CG32209	10448	10448	6996	6996	1.78e-151	2.52e-150	17444	1395	1443	1443	1284	1284	0.00247504	0.000576631	5.40711e-36	1.58e-35	1	1	0.578625	-0.168426	0.578625	0.747051	43.6475
CG1106	9639	9639	13621	13621	6.29e-151	8.88e-150	23260	2172	8477	8477	1998	1998	0	0	0	0	1	1	-0.498877	-2.085	0.498877	1.58612	23.927
CG4847	7299	7299	4475	4475	1.17e-150	1.64e-149	11774	1361	3488	3488	1252	1252	1.63e-240	9.67e-240	0	0	1	1	0.705811	-1.47817	0.705811	2.18398	24.4243
CG31352	471	471	1632	1632	3.03e-149	4.24e-148	2103	209	902	902	193	193	5.33e-110	1.35e-109	0.00152375	0.000652467	1	1	-1.79284	-2.22453	1.79284	0.431684	80.5943
CG17932	5722	5722	3281	3281	1.21e-147	1.69e-146	9003	1186	2182	2182	1091	1091	1.86e-82	3.46e-82	7.9434e-196	1.77e-194	1	1	0.802384	-1	0.802384	1.80238	30.8044
CG8430	10997	10997	7489	7489	1.38e-147	1.91e-146	18486	2993	3864	3864	2753	2753	1.38e-42	1.34e-42	1.5639e-138	2.13e-137	1	1	0.554265	-0.48909	0.554265	1.04336	34.6932
CG18110	3	3	507	507	1.32e-146	1.83e-145	510	0	89	89	0	1	1.47e-25	9.42e-26	0.478918	0.132024	1	0	-7.40088	-6.47573	7.40088	0.925146	88.8885
CG16712	8086	8086	5136	5136	2.87e-146	3.96e-145	13222	2325	3619	3619	2139	2139	1.53e-85	2.99e-85	3.5756e-205	8.52e-204	1	1	0.654781	-0.758655	0.654781	1.41344	31.6592
CG7763	136	136	931	931	3.4e-146	4.68e-145	1067	5	966	966	5	5	7.17e-280	5.1e-279	1.71461e-33	4.64e-33	1	1	-2.77517	-7.59395	2.77517	4.81878	36.5445
CG15105	15087	15087	10944	10944	5.85e-146	8.02e-145	26031	2970	3333	3333	2732	2732	1.25e-14	5.54e-15	1.0613e-73	7.34e-73	1	1	0.463166	-0.286864	0.463166	0.75003	38.1773
CG5172	3564	3564	1716	1716	1.53e-145	2.1e-144	5280	334	54	54	308	308	2.57e-44	2.56e-44	1.9393e-13	2.07e-13	1	1	1.05445	2.5119	1.05445	1.45745	41.9781
CG31288	2342	2342	4441	4441	1.77e-145	2.41e-144	6783	613	3335	3335	564	564	0	0	7.1412e-119	7.97e-118	1	1	-0.923143	-2.56392	0.923143	1.64078	36.0052
CG14904	809	809	2177	2177	2.58e-143	3.51e-142	2986	324	1006	1006	299	299	1.15e-89	2.36e-89	0.00395784	0.00160223	1	1	-1.42813	-1.75041	1.42813	0.322283	81.5882
CG6821	15120	15120	11015	11015	9.43e-143	1.27e-141	26135	820	3956	3956	755	755	0	0	0	0	1	1	0.456989	-2.38949	0.456989	2.84648	13.8336
CG31343	10956	10956	7512	7512	1.98e-142	2.67e-141	18468	5188	8356	8356	4772	4772	2.19e-217	1.16e-216	0	0	1	1	0.544452	-0.808218	0.544452	1.35267	28.6988
CG5167	3074	3074	1402	1402	5.08e-141	6.82e-140	4476	1166	615	615	1073	1073	4.44e-29	3.16e-29	0.000159384	7.71e-05	1	1	1.13263	0.802992	1.13263	0.329639	77.457
CG9503	7	7	509	509	1.75e-140	2.35e-139	516	93	138	138	86	86	0.000623249	0.000152879	4.45315e-42	1.58e-41	1	1	-6.18417	-0.68226	6.18417	5.50191	52.9191
CG9249	528	528	1685	1685	4.52e-140	6.04e-139	2213	176	852	852	162	162	1.34e-113	3.53e-113	2.69277e-07	1.76e-07	1	1	-1.67414	-2.39486	1.67414	0.720721	69.9055
CG2958	629	629	37	37	5.35e-140	7.12e-139	666	112	88	88	104	104	0.278982	0.0515861	8.01249e-37	2.42e-36	1	1	4.08746	0.241008	4.08746	3.84645	51.5188
CG11669	10976	10976	7561	7561	1.53e-139	2.03e-138	18537	1156	2144	2144	1064	1064	1.81e-82	3.35e-82	1.9086e-165	3.3e-164	1	1	0.537703	-1.01081	0.537703	1.54851	25.7741
CG4752	4013	4013	6582	6582	9.78e-139	1.29e-137	10595	1309	3360	3360	1205	1205	4.75e-232	2.69e-231	1.95357e-43	7.32e-43	1	1	-0.713845	-1.47943	0.713845	0.765583	48.2514
CG18343	881	881	130	130	1.17e-137	1.54e-136	1011	689	73	73	634	634	1.62e-112	4.22e-112	0.111491	0.0355819	1	0	2.76063	3.11851	2.76063	0.357884	88.5239
CG4302	2300	2300	4316	4316	1.27e-137	1.67e-136	6616	442	2627	2627	407	407	0	0	1.2915e-113	1.38e-112	1	1	-0.908061	-2.69032	0.908061	1.78225	33.753
CG10842	2212	2212	859	859	5.34e-136	6.98e-135	3071	601	599	599	553	553	0.184873	0.0350884	5.64542e-47	2.32e-46	1	1	1.36462	-0.115277	1.36462	1.4799	47.9737
CG5920	23387	23387	18333	18333	1.93e-135	2.52e-134	41720	27788	12775	12775	25560	25560	4.940656e-324	4.446591e-323	6.5442e-209	1.61e-207	1	1	0.351264	1.00056	0.351264	0.649301	35.1066
CG6592	8	8	495	495	7.46e-135	9.69e-134	503	0	312	312	0	1	3.76e-92	8e-92	0.164623	0.050846	1	0	-5.95128	-8.2854	5.95128	2.33412	71.8286
CG18522	19255	19255	14716	14716	3.02e-134	3.91e-133	33971	3730	7042	7042	3431	3431	3.34e-278	2.36e-277	0	0	1	1	0.387848	-1.03736	0.387848	1.4252	21.392
CG4783	834	834	117	117	5.03e-134	6.49e-133	951	726	27	27	668	668	3.78e-161	1.44e-160	5.78448e-10	4.78e-10	1	1	2.83354	4.62882	2.83354	1.79528	61.2152
CG2064	999	999	190	190	6.75e-133	8.68e-132	1189	371	201	201	342	342	1.53e-09	5.4e-10	3.78353e-21	6.22e-21	1	1	2.39449	0.766801	2.39449	1.62768	59.5322
CG12794	2048	2048	769	769	7.93e-133	1.02e-131	2817	1996	486	486	1836	1836	1.28e-183	5.72e-183	1.22481e-07	8.27e-08	1	1	1.41316	1.91754	1.41316	0.504378	73.6966
CG15362	35	35	596	596	8.85e-133	1.13e-131	631	27	313	313	25	25	1.68e-64	2.44e-64	0.265151	0.078253	1	0	-4.08989	-3.64616	4.08989	0.443723	90.2126
CG32523	446	446	0	1	2.47e-132	3.14e-131	447	208	0	1	192	192	3.09e-56	3.98e-56	0.512515	0.140059	1	0	8.8009	7.58496	8.8009	1.21594	87.8611
CG18563	205	205	1027	1027	7.13e-132	9.05e-131	1232	70	327	327	65	65	3.96e-43	3.88e-43	1	0.246323	1	0	-2.32474	-2.33078	2.32474	0.00603865	99.7409
CG14997	1368	1368	2947	2947	1.8e-130	2.28e-129	4315	399	1579	1579	368	368	3.91e-178	1.68e-177	1.15795e-26	2.43e-26	1	1	-1.10718	-2.10123	1.10718	0.994055	52.6919
CG16752	512	512	1603	1603	2.97e-130	3.74e-129	2115	257	837	837	237	237	5.87e-79	1.04e-78	0.185007	0.0564952	1	0	-1.64656	-1.82034	1.64656	0.173782	90.4533
CG9270	571	571	31	31	1.04e-129	1.3e-128	602	196	11	11	181	181	8.29e-41	7.77e-41	0.714456	0.187501	1	0	4.20315	4.04041	4.20315	0.162736	96.2725
CG6378	9479	9479	6431	6431	1.04e-129	1.3e-128	15910	3121	2000	2000	2871	2871	7.58e-36	6.4e-36	0.433224	0.121211	1	0	0.559692	0.521553	0.559692	0.0381384	93.6205
CG33258	2115	2115	824	824	1.93e-129	2.41e-128	2939	570	706	706	525	525	2.76e-07	8.64e-08	3.17188e-70	2.07e-69	1	1	1.35994	-0.427351	1.35994	1.78729	43.2107
CG1633	5645	5645	8506	8506	1.37e-128	1.7e-127	14151	3934	4271	4271	3619	3619	2.25e-13	9.48e-14	8.0092e-18	1.1e-17	1	1	-0.591507	-0.238983	0.591507	0.352524	62.6576
CG31075	4119	4119	6599	6599	7.59e-128	9.43e-127	10718	1216	2088	2088	1119	1119	1.66e-66	2.5e-66	0.0002771	0.00013098	1	1	-0.679953	-0.899912	0.679953	0.219958	75.5578
CG7133	251	251	1098	1098	1.8e-126	2.23e-125	1349	411	676	676	379	379	4.56e-20	2.48e-20	1.31015e-21	2.21e-21	1	1	-2.12912	-0.834825	2.12912	1.29429	62.1929
CG1561	4493	4493	2505	2505	2.05e-126	2.53e-125	6998	2732	1443	1443	2513	2513	1.43e-65	2.12e-65	0.481265	0.132623	1	0	0.842868	0.800339	0.842868	0.0425291	95.1966
CG15254	538	538	1624	1624	5.64e-126	6.94e-125	2162	211	1767	1767	195	195	1.150912e-316	9.313473e-316	2.74554e-37	8.42e-37	1	1	-1.59387	-3.17976	1.59387	1.58588	50.1257
CG3612	144596	144596	132045	132045	7.09e-126	8.69e-125	276641	49540	57827	57827	45568	45568	1.019257e-318	8.371814e-318	0	0	1	1	0.130998	-0.343722	0.130998	0.47472	21.6269
CG10814	1573	1573	3207	3207	8.14e-126	9.95e-125	4780	27	389	389	25	25	4.14e-85	7.98e-85	1.16149e-37	3.61e-37	1	1	-1.02771	-3.95977	1.02771	2.93206	25.9537
CG3902	9596	9596	13187	13187	1.49e-125	1.82e-124	22783	3735	3691	3691	3436	3436	0.00262115	0.000609287	1.81186e-19	2.72e-19	1	1	-0.458611	-0.103282	0.458611	0.35533	56.3445
CG11309	2905	2905	1366	1366	3.32e-125	4.03e-124	4271	1072	744	744	987	987	5.68e-09	1.94e-09	1.13274e-15	1.38e-15	1	1	1.08858	0.407747	1.08858	0.680833	61.5221
CG5055	351	351	1286	1286	3.5e-125	4.24e-124	1637	325	596	596	299	299	1.73e-23	1.04e-23	8.34174e-11	7.37e-11	1	1	-1.87335	-0.995167	1.87335	0.878181	68.0839
CG15408	1131	1131	2557	2557	6.32e-125	7.61e-124	3688	403	1163	1163	371	371	4.1e-95	8.99e-95	2.17951e-06	1.3e-06	1	1	-1.17685	-1.64836	1.17685	0.471507	71.3954
CG30042	11130	11130	7861	7861	6.32e-125	7.61e-124	18991	2384	4448	4448	2193	2193	9.79e-172	4.03e-171	5.0068e-286	1.83e-284	1	1	0.501669	-1.02025	0.501669	1.52192	24.791
CG7298	542	542	28	28	1.33e-124	1.6e-123	570	28	57	57	26	26	0.000877552	0.00021234	2.79632e-40	9.43e-40	1	1	4.27479	-1.13245	4.27479	5.40724	44.1518
CG32984	605	605	48	48	1.04e-123	1.24e-122	653	106	16	16	98	98	1.48e-15	6.78e-16	0.0259914	0.00927266	1	0	3.65583	2.61471	3.65583	1.04112	77.8341
CG10369	1584	1584	526	526	1.55e-122	1.85e-121	2110	425	320	320	391	391	0.00861353	0.00190389	5.10987e-23	9.25e-23	1	1	1.59044	0.289097	1.59044	1.30134	54.9986
CG11315	1960	1960	754	754	1.61e-122	1.91e-121	2714	373	393	393	344	344	0.0769727	0.0153639	3.19273e-37	9.75e-37	1	1	1.37822	-0.192121	1.37822	1.57034	46.7421
CG4373	462	462	10	10	2.3e-122	2.73e-121	472	105	0	1	97	97	6.25e-28	4.28e-28	0.699354	0.184188	1	0	5.52982	6.59991	5.52982	1.07009	83.7863
CG6287	5763	5763	3509	3509	2.85e-122	3.37e-121	9272	2689	1254	1254	2474	2474	2.72e-90	5.59e-90	6.51476e-06	3.69e-06	1	1	0.71576	0.980308	0.71576	0.264548	73.0138
CG6409	23545	23545	28917	28917	8.27e-122	9.74e-121	52462	5666	13900	13900	5212	5212	4.940656e-324	4.446591e-323	0	0	1	1	-0.296497	-1.41518	0.296497	1.11868	20.9513
CG32754	1314	1314	376	376	1.25e-121	1.47e-120	1690	377	296	296	347	347	0.0485472	0.00992284	2.29111e-28	5.17e-28	1	1	1.80516	0.229338	1.80516	1.57582	53.3916
CG33197	1183	1183	307	307	2.88e-121	3.37e-120	1490	457	173	173	421	421	7.9e-25	4.95e-25	4.16451e-05	2.16e-05	1	1	1.94614	1.28305	1.94614	0.663091	74.5867
CG9364	12276	12276	8881	8881	6.19e-121	7.23e-120	21157	3729	4468	4468	3430	3430	1.51e-31	1.15e-31	4.7143e-109	4.8e-108	1	1	0.467047	-0.381421	0.467047	0.848467	35.503
CG32594	1683	1683	591	591	1.15e-120	1.34e-119	2274	745	321	321	686	686	4.08e-31	3.07e-31	0.000616317	0.000277915	1	1	1.50981	1.09564	1.50981	0.41417	78.4732
CG17192	407	407	1	1	1.24e-120	1.44e-119	408	923	2	2	849	849	4.83e-251	3.06e-250	1	0.246323	1	0	8.66888	8.72962	8.66888	0.0607358	99.3043
CG32581	406	406	0	1	2.47e-120	2.86e-119	407	184	0	1	170	170	1.15e-49	1.29e-49	0.504531	0.1382	1	0	8.66534	7.40939	8.66534	1.25594	87.3409
CG16963	1453	1453	458	458	3.69e-120	4.26e-119	1911	296	221	221	273	273	0.0216613	0.00461286	8.80758e-19	1.27e-18	1	1	1.66562	0.304855	1.66562	1.36076	55.0366
CG3724	8534	8534	11848	11848	1.2e-119	1.38e-118	20382	2359	5114	5114	2170	2170	4.27e-268	2.89e-267	2.07034e-75	1.48e-74	1	1	-0.47335	-1.23676	0.47335	0.763408	38.2734
CG32172	6219	6219	9089	9089	1.21e-119	1.39e-118	15308	2244	5055	5055	2065	2065	1.78e-283	1.28e-282	2.0259e-64	1.21e-63	1	1	-0.547439	-1.29157	0.547439	0.74413	42.3856
CG32698	724	724	98	98	9.63e-119	1.1e-117	822	122	56	56	113	113	1.38e-05	3.84e-06	1.65601e-10	1.44e-10	1	1	2.88514	1.01282	2.88514	1.87231	60.6446
CG8562	1757	1757	3400	3400	1.03e-117	1.18e-116	5157	665	2079	2079	612	612	1.7e-185	7.69e-185	7.37304e-26	1.51e-25	1	1	-0.952421	-1.76429	0.952421	0.811866	53.9833
CG6776	2085	2085	854	854	1.78e-117	2.02e-116	2939	850	537	537	782	782	1.61e-11	6.25e-12	1.3361e-13	1.44e-13	1	1	1.28774	0.542247	1.28774	0.745493	63.3346
CG9707	2881	2881	1392	1392	4.29e-117	4.86e-116	4273	951	803	803	875	875	0.0830198	0.0164988	1.46748e-27	3.2e-27	1	1	1.04941	0.123883	1.04941	0.925527	53.1364
CG8654	1822	1822	689	689	4.31e-117	4.88e-116	2511	263	320	320	242	242	0.00114322	0.000274242	6.09856e-39	2e-38	1	1	1.40295	-0.403065	1.40295	1.80601	43.7197
CG14235	18810	18810	14621	14621	2.07e-116	2.34e-115	33431	6880	6490	6490	6329	6329	0.157605	0.0302031	2.19502e-40	7.42e-40	1	1	0.363458	-0.0362409	0.363458	0.399699	47.6256
CG3961	3861	3861	2103	2103	2.89e-116	3.25e-115	5964	821	777	777	756	756	0.609499	0.106277	7.27516e-28	1.62e-27	1	1	0.876526	-0.0395284	0.876526	0.916054	48.8974
CG33281	2797	2797	1341	1341	1.1e-115	1.24e-114	4138	345	468	468	318	318	9.81e-08	3.15e-08	1.42802e-45	5.67e-45	1	1	1.06057	-0.557482	1.06057	1.61805	39.5939
CG10944	27221	27221	22145	22145	1.12e-115	1.26e-114	49366	24486	11526	11526	22523	22523	4.940656e-324	4.446591e-323	2.4401e-224	6.89e-223	1	1	0.297739	0.966507	0.297739	0.668768	30.8057
CG16772	9142	9142	6315	6315	5.2e-115	5.8e-114	15457	1668	3481	3481	1535	1535	2.09e-170	8.5e-170	2.8266e-275	9.91e-274	1	1	0.533727	-1.18126	0.533727	1.71499	23.7347
CG8050	26188	26188	31644	31644	4.44e-114	4.94e-113	57832	3968	14588	14588	3650	3650	4.940656e-324	4.446591e-323	0	0	1	1	-0.273026	-1.99881	0.273026	1.72579	13.6594
CG11347	8004	8004	5393	5393	2.65e-113	2.94e-112	13397	2806	2828	2828	2581	2581	0.000821713	0.000199328	7.22125e-51	3.24e-50	1	1	0.569633	-0.131852	0.569633	0.701485	44.8135
CG5548	2264	2264	994	994	2.13e-112	2.36e-111	3258	1050	483	483	966	966	2.03e-37	1.77e-37	0.056727	0.0191077	1	0	1.18756	1	1.18756	0.187556	86.3607
CG2155	529	529	1528	1528	6.99e-112	7.71e-111	2057	202	920	920	186	186	3.5e-117	9.51e-117	8.14812e-09	6.11e-09	1	1	-1.5303	-2.30633	1.5303	0.776026	66.3523
CG4013	4528	4528	2639	2639	1.85e-111	2.04e-110	7167	3386	1440	1440	3115	3115	5.41e-139	1.72e-138	7.90748e-09	5.94e-09	1	1	0.778883	1.11316	0.778883	0.334281	69.9702
CG17597	1926	1926	778	778	3.06e-111	3.35e-110	2704	906	403	403	834	834	4.64e-35	3.85e-35	0.0164913	0.00608688	1	0	1.30777	1.04927	1.30777	0.258498	83.4959
CG14066	5239	5239	3198	3198	2.38e-110	2.6e-109	8437	4809	1848	1848	4424	4424	7.91e-239	4.68e-238	9.86865e-27	2.07e-26	1	1	0.712122	1.25939	0.712122	0.547265	56.5451
CG7695	530	530	40	40	2.9e-110	3.16e-109	570	244	21	21	225	225	2.57e-44	2.56e-44	0.4694	0.129852	1	0	3.72792	3.42146	3.72792	0.306457	92.4039
CG2505	1370	1370	442	442	3.48e-110	3.78e-109	1812	320	190	190	295	295	2.14e-06	6.29e-07	3.42126e-10	2.89e-10	1	1	1.63206	0.634716	1.63206	0.997342	62.0696
CG18290	28040	28040	23005	23005	3.76e-110	4.08e-109	51045	6951	7408	7408	6394	6394	6.33e-18	3.19e-18	4.13514e-72	2.77e-71	1	1	0.285539	-0.212365	0.285539	0.497904	36.4467
CG33109	1665	1665	3207	3207	7.53e-110	8.15e-109	4872	327	3290	3290	301	301	0	0	2.5511e-186	5.4e-185	1	1	-0.945702	-3.45025	0.945702	2.50455	27.4097
CG4994	22997	22997	18468	18468	9.31e-110	1e-108	41465	11300	10937	10937	10394	10394	0.000206272	5.26e-05	1.13871e-57	5.9e-57	1	1	0.316418	-0.0734661	0.316418	0.389884	44.7992
CG4381	97	97	684	684	1.46e-109	1.57e-108	781	117	334	334	108	108	6.22e-28	4.26e-28	1.18375e-07	8.01e-08	1	1	-2.81794	-1.62882	2.81794	1.18912	70.3243
CG11672	908	908	2113	2113	2.59e-109	2.78e-108	3021	483	982	982	445	445	8.69e-47	9.18e-47	0.463496	0.128523	1	0	-1.21853	-1.14192	1.21853	0.0766109	94.0847
CG31692	7448	7448	4981	4981	4.02e-109	4.3e-108	12429	1253	1723	1723	1153	1153	1.84e-26	1.21e-26	1.5712e-82	1.22e-81	1	1	0.580418	-0.57953	0.580418	1.15995	33.3503
CG3597	6827	6827	9670	9670	5.11e-109	5.45e-108	16497	854	3069	3069	786	786	7.759672e-316	6.248543e-315	2.8981e-139	3.97e-138	1	1	-0.502264	-1.96517	0.502264	1.4629	25.5583
CG6871	25896	25896	21104	21104	2.1e-108	2.24e-107	47000	7490	8771	8771	6890	6890	3.97e-51	4.61e-51	2.8375e-128	3.5e-127	1	1	0.295213	-0.348237	0.295213	0.64345	31.4504
CG10960	5629	5629	3523	3523	3e-108	3.19e-107	9152	2340	1270	1270	2153	2153	6.47e-52	7.65e-52	0.154705	0.048049	1	0	0.676074	0.76152	0.676074	0.0854456	88.7796
CG17527	953	953	223	223	8.49e-108	8.98e-107	1176	352	130	130	324	324	3.5e-20	1.91e-20	3.09023e-05	1.63e-05	1	1	2.09543	1.31748	2.09543	0.77795	72.9256
CG18324	1127	1127	314	314	1.39e-107	1.47e-106	1441	449	125	125	413	413	5.91e-37	5.1e-37	0.503782	0.138026	1	0	1.84365	1.72421	1.84365	0.119437	93.9158
CG11458	5537	5537	8103	8103	1.56e-107	1.64e-106	13640	951	2791	2791	875	875	1.08e-230	6.09e-230	4.79801e-81	3.66e-80	1	1	-0.549352	-1.67343	0.549352	1.12408	32.8279
CG1742	3759	3759	2089	2089	4.75e-107	4.99e-106	5848	1162	673	673	1069	1069	2e-21	1.13e-21	0.0269558	0.00958053	1	0	0.847536	0.667583	0.847536	0.179953	82.4861
CG9360	3315	3315	1765	1765	2.23e-106	2.34e-105	5080	598	1172	1172	551	551	1.5e-51	1.76e-51	1.6108e-128	2e-127	1	1	0.909341	-1.08885	0.909341	1.99819	31.2754
CG14500	486	486	31	31	3.17e-106	3.31e-105	517	480	11	11	442	442	3.22e-115	8.61e-115	0.00686083	0.00268575	1	1	3.97062	5.32847	3.97062	1.35785	74.517
CG11739	2897	2897	1468	1468	1.7e-105	1.77e-104	4365	816	487	487	751	751	6.25e-14	2.69e-14	0.000229881	0.000109705	1	1	0.980708	0.624891	0.980708	0.355817	73.3775
CG5164	1189	1189	355	355	3.94e-105	4.09e-104	1544	1149	139	139	1057	1057	3.36e-175	1.41e-174	7.82743e-15	9.02e-15	1	1	1.74386	2.92682	1.74386	1.18296	59.582
CG1130	647	647	90	90	8.81e-105	9.13e-104	737	224	38	38	207	207	2.46e-29	1.75e-29	0.189606	0.0577561	1	0	2.84577	2.44556	2.84577	0.400209	87.6706
CG18048	99	99	669	669	9.8e-105	1.01e-103	768	199	391	391	184	184	3.76e-18	1.91e-18	3.36347e-17	4.48e-17	1	1	-2.75651	-1.08746	2.75651	1.66904	62.2862
CG30415	13631	13631	10281	10281	2.39e-104	2.45e-103	23912	5529	3679	3679	5086	5086	3.44e-51	4.01e-51	0.098286	0.0316555	1	0	0.406911	0.467218	0.406911	0.060307	87.0923
CG17841	5647	5647	3572	3572	2.38e-104	2.45e-103	9219	1717	1991	1991	1580	1580	6.49e-12	2.56e-12	2.14104e-67	1.34e-66	1	1	0.660753	-0.333569	0.660753	0.994321	39.9228
CG11579	4491	4491	2668	2668	5.74e-104	5.88e-103	7159	3567	1465	1465	3281	3281	7.08e-157	2.61e-156	6.07283e-13	6.25e-13	1	1	0.751278	1.16323	0.751278	0.411957	64.5852
CG5945	5298	5298	3303	3303	1.85e-103	1.89e-102	8601	1530	2094	2094	1408	1408	3.56e-31	2.68e-31	5.167e-102	4.88e-101	1	1	0.681671	-0.572614	0.681671	1.25428	35.2111
CG31991	959	959	2148	2148	2.39e-103	2.43e-102	3107	432	796	796	398	398	4.19e-31	3.15e-31	0.123896	0.0392042	1	0	-1.16339	-1	1.16339	0.163391	87.6852
CG9458	2649	2649	1305	1305	3.31e-103	3.36e-102	3954	630	449	449	580	580	4.96e-05	1.32e-05	3.4145e-10	2.88e-10	1	1	1.0214	0.369337	1.0214	0.652061	61.0352
CG8823	396	396	10	10	3.72e-103	3.78e-102	406	64	8	8	59	59	1.02e-10	3.79e-11	0.00147142	0.000631824	1	1	5.30743	2.88264	5.30743	2.42479	68.6405
CG10622	152	152	783	783	5.41e-103	5.47e-102	935	99	394	394	92	92	1.55e-45	1.59e-45	0.208223	0.0629092	1	0	-2.36494	-2.09849	2.36494	0.266451	89.8741
CG5461	3224	3224	1723	1723	1.73e-102	1.74e-101	4947	1405	912	912	1293	1293	4.96e-16	2.33e-16	1.45781e-07	9.78e-08	1	1	0.903929	0.503617	0.903929	0.400312	69.3069
CG2227	7827	7827	10750	10750	2.25e-102	2.26e-101	18577	1644	3729	3729	1513	1513	4.48e-212	2.35e-211	1.46453e-69	9.46e-69	1	1	-0.457805	-1.30138	0.457805	0.843572	35.1785
CG14990	401	401	12	12	4.26e-102	4.28e-101	413	108	10	10	100	100	8.01e-20	4.32e-20	0.0124858	0.00470323	1	1	5.0625	3.32193	5.0625	1.74057	74.4149
CG30008	10369	10369	7508	7508	6.12e-102	6.13e-101	17877	3117	4631	4631	2868	2868	7.01e-93	1.5e-92	1.4041e-182	2.8e-181	1	1	0.465776	-0.691279	0.465776	1.15705	28.7015
CG4485	351	351	2	2	6.81e-102	6.8e-101	353	81	0	1	75	75	2.04e-21	1.15e-21	0.443717	0.123794	1	0	7.45533	6.22882	7.45533	1.22651	85.8727
CG11299	7437	7437	5049	5049	7.37e-102	7.34e-101	12486	2352	2185	2185	2164	2164	0.761685	0.130067	3.97863e-29	9.23e-29	1	1	0.558723	-0.0139328	0.558723	0.572656	49.3843
CG5254	2870	2870	1471	1471	1.11e-101	1.11e-100	4341	580	610	610	534	534	0.0265511	0.00560475	1.20177e-32	3.17e-32	1	1	0.964253	-0.19197	0.964253	1.15622	45.4734
CG3363	96	96	646	646	5.99e-101	5.94e-100	742	512	385	385	471	471	0.00364503	0.000836868	2.90567e-73	2e-72	1	1	-2.75043	0.290869	2.75043	3.0413	47.4889
CG10472	7262	7262	10061	10061	1.02e-100	1e-99	17323	3677	8615	8615	3383	3383	4.940656e-324	4.446591e-323	2.0795e-129	2.63e-128	1	1	-0.470335	-1.34855	0.470335	0.878213	34.8771
CG4027	21697	21697	26356	26356	2.36e-100	2.33e-99	48053	14318	14179	14179	13170	13170	1.09e-09	3.86e-10	1.92342e-15	2.3e-15	1	1	-0.280636	-0.1065	0.280636	0.174135	61.7092
CG18088	186	186	842	842	3.52e-100	3.46e-99	1028	54	188	188	50	50	5.31e-20	2.88e-20	0.309887	0.0899208	1	0	-2.17852	-1.91073	2.17852	0.267785	89.0535
CG13977	1625	1625	3070	3070	3.61e-100	3.54e-99	4695	325	1697	1697	299	299	1.13e-236	6.52e-236	6.711e-64	3.95e-63	1	1	-0.917799	-2.50477	0.917799	1.58697	36.6421
CG2930	2003	2003	3579	3579	5.68e-100	5.56e-99	5582	861	2292	2292	792	792	2.24e-167	8.96e-167	1.0302e-22	1.84e-22	1	1	-0.837394	-1.53303	0.837394	0.695641	54.6233
CG30002	716	716	128	128	7.8e-100	7.62e-99	844	202	122	122	186	186	0.000316411	7.94e-05	1.56012e-17	2.12e-17	1	1	2.48382	0.608421	2.48382	1.87539	56.9786
CG14120	872	872	1990	1990	2.25e-99	2.2e-98	2862	577	940	940	531	531	9.4e-27	6.25e-27	0.000212049	0.00010161	1	1	-1.19037	-0.823949	1.19037	0.366419	76.4631
CG15043	1423	1423	2784	2784	2.37e-99	2.3e-98	4207	667	2533	2533	614	614	7.44e-275	5.14e-274	7.01405e-43	2.55e-42	1	1	-0.968224	-2.04454	0.968224	1.07631	47.3566
CG17896	10119	10119	7333	7333	4.53e-99	4.39e-98	17452	3864	2805	2805	3555	3555	5.32e-21	2.97e-21	0.00406107	0.00164274	1	1	0.464591	0.341849	0.464591	0.122742	79.1017
CG13917	3378	3378	1863	1863	1.75e-98	1.69e-97	5241	1749	979	979	1609	1609	1.89e-35	1.58e-35	0.0484911	0.0165057	1	0	0.858542	0.716784	0.858542	0.141758	85.8284
CG10297	18202	18202	14408	14408	3.64e-98	3.51e-97	32610	5700	6974	6974	5243	5243	2.14e-55	2.7e-55	4.4843e-131	5.79e-130	1	1	0.337227	-0.411594	0.337227	0.748821	31.0508
CG18445	3159	3159	5057	5057	4.04e-98	3.88e-97	8216	2241	3592	3592	2062	2062	4.76e-93	1.02e-92	0.0185747	0.00679558	1	0	-0.678814	-0.800743	0.678814	0.121929	84.773
CG8094	8944	8944	6351	6351	5.42e-98	5.2e-97	15295	1402	1529	1529	1290	1290	7.29e-06	2.06e-06	1.48898e-35	4.29e-35	1	1	0.493936	-0.245217	0.493936	0.739154	40.0568
CG31793	1658	1658	662	662	7.06e-98	6.76e-97	2320	992	219	219	913	913	4.15e-101	9.62e-101	4.20845e-09	3.23e-09	1	1	1.32454	2.05968	1.32454	0.735143	64.308
CG9486	665	665	110	110	1.49e-97	1.42e-96	775	212	36	36	195	195	1.32e-27	8.95e-28	0.595646	0.159876	1	0	2.59585	2.43741	2.59585	0.158446	94.2473
CG2493	2474	2474	4174	4174	1.74e-97	1.66e-96	6648	1001	1847	1847	921	921	1.67e-70	2.67e-70	0.000285574	0.000134764	1	1	-0.754585	-1.00391	0.754585	0.249326	75.1646
CG3382	1276	1276	2560	2560	3.83e-97	3.64e-96	3836	502	1490	1490	462	462	1.21e-125	3.51e-125	3.06043e-14	3.41e-14	1	1	-1.00452	-1.68935	1.00452	0.684832	59.4617
CG14792	16814	16814	20870	20870	4.44e-97	4.21e-96	37684	27545	13343	13343	25337	25337	4.940656e-324	4.446591e-323	0	0	1	1	-0.311768	0.925163	0.311768	1.23693	20.131
CG8550	683	683	1685	1685	5.63e-97	5.32e-96	2368	108	550	550	100	100	3.54e-76	6.11e-76	7.61915e-13	7.79e-13	1	1	-1.30279	-2.45943	1.30279	1.15664	52.9712
CG8732	10362	10362	13590	13590	7.69e-97	7.25e-96	23952	4110	5001	5001	3781	3781	8.39e-39	7.53e-39	0.743385	0.194201	1	0	-0.391243	-0.403449	0.391243	0.0122058	96.9746
CG9538	1918	1918	836	836	8.38e-97	7.89e-96	2754	1444	276	276	1329	1329	4e-165	1.56e-164	1.48126e-22	2.63e-22	1	1	1.19803	2.2676	1.19803	1.06957	52.8324
CG5791	2740	2740	1409	1409	2.25e-96	2.11e-95	4149	453	927	927	417	417	6.84e-45	6.9e-45	1.1987e-112	1.27e-111	1	1	0.959504	-1.15252	0.959504	2.11203	31.2386
CG11912	417	417	22	22	1.06e-95	9.89e-95	439	267	14	14	246	246	5.93e-56	7.59e-56	0.860351	0.21957	1	0	4.24447	4.13516	4.24447	0.109312	97.4893
CG8772	2381	2381	1161	1161	3.99e-95	3.73e-94	3542	1009	649	649	929	929	1.9e-12	7.68e-13	9.81101e-09	7.32e-09	1	1	1.0362	0.51746	1.0362	0.51874	66.6392
CG17725	28850	28850	34035	34035	4.81e-95	4.49e-94	62885	3678	6967	6967	3384	3384	3.46e-277	2.41e-276	1.345e-141	1.88e-140	1	1	-0.238448	-1.04181	0.238448	0.80336	22.8879
CG13065	1005	1005	284	284	1.1e-94	1.02e-93	1289	26	8	8	24	24	0.00700037	0.0015597	0.668491	0.176933	1	0	1.82323	1.58496	1.82323	0.23827	88.4419
CG10570	10913	10913	8078	8078	2.57e-94	2.38e-93	18991	3071	3261	3261	2825	2825	2.43e-08	8.02e-09	4.4908e-51	2.03e-50	1	1	0.433978	-0.207064	0.433978	0.641041	40.3693
CG14526	3132	3132	1709	1709	3.44e-94	3.19e-93	4841	797	911	911	734	734	1.4e-05	3.89e-06	6.46682e-46	2.59e-45	1	1	0.873932	-0.311671	0.873932	1.1856	42.4335
CG1927	3442	3442	1942	1942	5.7e-94	5.27e-93	5384	1263	1055	1055	1162	1162	0.0243481	0.00515696	1.61703e-20	2.58e-20	1	1	0.825704	0.139367	0.825704	0.686337	54.6086
CG3019	3194	3194	1757	1757	6.86e-94	6.32e-93	4951	1498	894	894	1378	1378	2.66e-24	1.63e-24	0.00161033	0.000687143	1	1	0.86225	0.624229	0.86225	0.238021	78.3671
CG9224	2179	2179	1028	1028	1.05e-93	9.65e-93	3207	502	555	555	462	462	0.00389413	0.000891442	2.96209e-37	9.08e-37	1	1	1.08383	-0.264595	1.08383	1.34842	44.5607
CG9497	893	893	1981	1981	1.15e-93	1.05e-92	2874	254	1089	1089	234	234	5.07e-132	1.54e-131	1.39045e-20	2.22e-20	1	1	-1.1495	-2.21842	1.1495	1.06893	51.8159
CG15534	825	825	193	193	1.48e-93	1.36e-92	1018	214	87	87	197	197	5.76e-11	2.17e-11	4.10749e-05	2.13e-05	1	1	2.09579	1.17911	2.09579	0.916685	69.5704
CG10512	1435	1435	2752	2752	1.71e-93	1.57e-92	4187	410	963	963	378	378	3.78e-59	5.13e-59	3.37878e-05	1.77e-05	1	1	-0.93943	-1.34915	0.93943	0.40972	69.6313
CG2706	5	5	339	339	2.21e-93	2.01e-92	344	79	125	125	73	73	0.000269079	6.79e-05	2.02156e-30	4.9e-30	1	1	-6.08321	-0.77596	6.08321	5.30725	53.4062
CG2604	3457	3457	5374	5374	3.99e-93	3.63e-92	8831	1477	2039	2039	1359	1359	1.48e-31	1.13e-31	0.397006	0.111984	1	0	-0.636476	-0.585316	0.636476	0.0511594	92.5601
CG2196	2919	2919	1560	1560	5.8e-93	5.26e-92	4479	926	797	797	852	852	0.18357	0.0348781	1.19883e-21	2.03e-21	1	1	0.903928	0.0962737	0.903928	0.807654	52.8124
CG6866	565	565	1470	1470	1.88e-92	1.71e-91	2035	318	901	901	293	293	2.59e-72	4.27e-72	0.0476159	0.0162325	1	0	-1.37949	-1.62063	1.37949	0.241133	85.121
CG11594	6677	6677	4526	4526	2.74e-92	2.47e-91	11203	955	1437	1437	879	879	2.88e-31	2.17e-31	6.70599e-81	5.1e-80	1	1	0.560963	-0.709125	0.560963	1.27009	30.6361
CG3523	32152	32152	37518	37518	6.2e-92	5.59e-91	69670	9792	26354	26354	9007	9007	4.940656e-324	4.446591e-323	0	0	1	1	-0.222674	-1.5489	0.222674	1.32623	14.3763
CG5724	310	310	0	1	1.5e-91	1.34e-90	311	51	0	1	47	47	3.48e-13	1.46e-13	0.249856	0.074176	1	0	8.27612	5.55459	8.27612	2.72154	75.2535
CG12055	93217	93217	84667	84667	2.2e-91	1.97e-90	177884	34219	35987	35987	31475	31475	1.29e-67	1.98e-67	1.3001e-142	1.86e-141	1	1	0.138793	-0.193269	0.138793	0.332063	29.4768
CG9675	1084	1084	2239	2239	5.45e-91	4.88e-90	3323	503	1281	1281	463	463	1.43e-88	2.89e-88	8.00686e-06	4.49e-06	1	1	-1.04649	-1.46819	1.04649	0.421697	71.2777
CG17795	335	335	6	6	9.5e-91	8.48e-90	341	109	0	1	101	101	4.06e-29	2.89e-29	1	0.246323	1	0	5.80305	6.65821	5.80305	0.855157	87.1564
CG4734	2307	2307	1135	1135	2.19e-90	1.95e-89	3442	560	443	443	516	516	0.0200243	0.00427478	9.48932e-14	1.03e-13	1	1	1.02333	0.220064	1.02333	0.803261	56.0239
CG4357	3038	3038	1665	1665	2.57e-90	2.28e-89	4703	1087	759	759	1000	1000	9.98e-09	3.36e-09	1.26913e-08	9.39e-09	1	1	0.8676	0.397828	0.8676	0.469771	64.8735
CG1885	578	578	1477	1477	2.82e-90	2.5e-89	2055	187	250	250	173	173	0.000211752	5.4e-05	3.87753e-07	2.49e-07	1	1	-1.35353	-0.531156	1.35353	0.822372	62.2054
CG12824	312	312	2	2	2.96e-90	2.62e-89	314	156	1	1	144	144	6.55e-42	6.28e-42	1	0.246323	1	0	7.2854	7.16993	7.2854	0.115477	98.4397
CG18787	6	6	333	333	3.67e-90	3.24e-89	339	6	128	128	6	6	6.91e-31	5.16e-31	0.107768	0.0344936	1	0	-5.79442	-4.41504	5.79442	1.37938	80.772
CG15098	4562	4562	2839	2839	6.23e-90	5.49e-89	7401	3013	1386	1386	2772	2772	2.83e-104	6.74e-104	6.8877e-08	4.76e-08	1	1	0.684284	1	0.684284	0.315716	68.4284
CG12766	469	469	1298	1298	9.2e-90	8.08e-89	1767	55	494	494	51	51	4.01e-92	8.52e-92	4.3658e-19	6.42e-19	1	1	-1.46863	-3.27594	1.46863	1.80731	44.8308
CG11143	4614	4614	2883	2883	1.34e-89	1.17e-88	7497	3181	777	777	2926	2926	1.28e-290	9.37e-290	4.46814e-80	3.37e-79	1	1	0.678447	1.91294	0.678447	1.2345	35.4661
CG9467	374	374	1137	1137	1.62e-89	1.41e-88	1511	133	569	569	123	123	2.13e-69	3.33e-69	0.000283344	0.000133763	1	1	-1.60412	-2.20977	1.60412	0.605648	72.5923
CG17533	461	461	43	43	1.76e-89	1.54e-88	504	201	50	50	185	185	2.1e-19	1.12e-19	2.61171e-06	1.54e-06	1	1	3.42236	1.88753	3.42236	1.53483	69.0383
CG30154	158	158	733	733	3.66e-89	3.19e-88	891	48	398	398	45	45	1e-71	1.63e-71	0.000255624	0.000121424	1	1	-2.21389	-3.14477	2.21389	0.930883	70.399
CG3360	1162	1162	392	392	1.67e-88	1.45e-87	1554	129	64	64	119	119	5.82e-05	1.54e-05	0.00580876	0.00229995	1	1	1.56768	0.894818	1.56768	0.672867	69.9687
CG3365	2803	2803	1510	1510	1.82e-87	1.58e-86	4313	1474	972	972	1356	1356	1.78e-15	8.14e-16	6.75248e-08	4.67e-08	1	1	0.892423	0.480329	0.892423	0.412094	68.4102
CG1666	1157	1157	393	393	2.47e-87	2.14e-86	1550	1786	367	367	1643	1643	4e-192	1.85e-191	3.73693e-07	2.4e-07	1	1	1.55779	2.16248	1.55779	0.604693	72.0371
CG8501	489	489	56	56	2.56e-87	2.21e-86	545	73	10	10	68	68	9.71e-12	3.8e-12	0.553764	0.149984	1	0	3.12634	2.76553	3.12634	0.360801	89.6534
CG31106	1481	1481	593	593	3.32e-87	2.86e-86	2074	771	88	88	710	710	1.2e-121	3.4e-121	1.46657e-25	2.98e-25	1	1	1.32047	3.01224	1.32047	1.69178	43.8367
CG32190	945	945	274	274	1.1e-86	9.48e-86	1219	476	139	139	438	438	5.17e-37	4.47e-37	0.471262	0.130294	1	0	1.78614	1.65585	1.78614	0.130292	93.2013
CG8112	1058	1058	2166	2166	2.34e-86	2.01e-85	3224	801	1017	1017	737	737	2.46e-11	9.46e-12	1.26986e-10	1.11e-10	1	1	-1.03369	-0.464583	1.03369	0.56911	64.4928
CG10545	3257	3257	1862	1862	1.35e-85	1.15e-84	5119	2080	939	939	1914	1914	9.16e-76	1.57e-75	0.0018881	0.000799831	1	1	0.806691	1.02739	0.806691	0.220703	78.5182
CG5321	1260	1260	466	466	2.86e-84	2.44e-83	1726	198	285	285	183	183	2.78e-06	8.12e-07	1.05301e-40	3.59e-40	1	1	1.43502	-0.639118	1.43502	2.07414	40.8936
CG6296	468	468	53	53	4.88e-84	4.16e-83	521	66	24	24	61	61	7.4e-05	1.95e-05	2.67426e-05	1.42e-05	1	1	3.14244	1.34577	3.14244	1.79667	63.6236
CG8034	2194	2194	3675	3675	4.9e-84	4.17e-83	5869	826	1924	1924	760	760	2.57e-115	6.88e-115	1.66987e-16	2.12e-16	1	1	-0.744181	-1.34004	0.744181	0.595857	55.5343
CG4377	1973	1973	940	940	3e-83	2.55e-82	2913	331	392	392	305	305	0.00110924	0.000266322	4.98518e-31	1.23e-30	1	1	1.06966	-0.362044	1.06966	1.4317	42.7631
CG2979	81602	81602	73985	73985	4.26e-83	3.6e-82	155587	113588	83970	83970	104480	104480	1.482197e-323	1.235164e-322	7.51727e-69	4.79e-68	1	1	0.141372	0.315281	0.141372	0.173909	44.8399
CG7882	2740	2740	1493	1493	6.09e-83	5.14e-82	4233	1445	898	898	1330	1330	5.21e-20	2.82e-20	7.54325e-05	3.8e-05	1	1	0.875962	0.566639	0.875962	0.309323	73.9031
CG1967	1953	1953	928	928	6.8e-83	5.73e-82	2881	1116	469	469	1027	1027	4.03e-48	4.38e-48	0.584458	0.157183	1	0	1.0735	1.13078	1.0735	0.0572811	94.9344
CG11907	2113	2113	1043	1043	2.61e-82	2.2e-81	3156	801	466	466	737	737	5.4e-15	2.43e-15	0.000480295	0.000220029	1	1	1.01855	0.661335	1.01855	0.357219	74.035
CG1349	1630	1630	712	712	3.4e-82	2.85e-81	2342	711	407	407	654	654	3.3e-14	1.43e-14	5.80368e-06	3.3e-06	1	1	1.19492	0.684262	1.19492	0.510661	70.0595
CG16904	12861	12861	9966	9966	5.4e-82	4.52e-81	22827	3346	4631	4631	3078	3078	2.18e-70	3.47e-70	1.0333e-137	1.39e-136	1	1	0.367916	-0.589331	0.367916	0.957247	27.7639
CG14205	278	278	0	1	5.77e-82	4.82e-81	279	317	17	17	292	292	7.8e-66	1.16e-65	0.000158021	7.65e-05	1	1	8.11894	4.10236	8.11894	4.01658	66.9023
CG1417	3158	3158	1814	1814	7.27e-82	6.06e-81	4972	1769	1147	1147	1628	1628	6.56e-20	3.55e-20	2.73553e-05	1.45e-05	1	1	0.799837	0.505235	0.799837	0.294601	73.0819
CG40486	517	517	1327	1327	7.41e-82	6.16e-81	1844	235	801	801	217	217	3.46e-79	6.17e-79	8.19561e-05	4.11e-05	1	1	-1.35993	-1.88411	1.35993	0.524175	72.1791
CG10910	2570	2570	1376	1376	1.15e-81	9.58e-81	3946	323	1092	1092	298	298	1.44e-106	3.51e-106	9.3087e-180	1.81e-178	1	1	0.901288	-1.87359	0.901288	2.77488	24.5171
CG1673	3002	3002	1698	1698	1.39e-81	1.15e-80	4700	647	751	751	596	596	2.67e-05	7.23e-06	1.09012e-37	3.39e-37	1	1	0.822088	-0.333501	0.822088	1.15559	41.5684
CG5119	45817	45817	40210	40210	1.72e-81	1.42e-80	86027	29208	19792	19792	26866	26866	4.55e-236	2.62e-235	1.33052e-51	6.11e-51	1	1	0.188329	0.440864	0.188329	0.252535	42.7181
CG32164	333	333	1021	1021	2e-81	1.65e-80	1354	882	1063	1063	812	812	7.39e-09	2.51e-09	1.5625e-28	3.55e-28	1	1	-1.61639	-0.38859	1.61639	1.2278	56.8313
CG9338	1410	1410	573	573	4.46e-81	3.67e-80	1983	710	377	377	654	654	5.26e-18	2.66e-18	2.04922e-05	1.1e-05	1	1	1.29909	0.794726	1.29909	0.504362	72.0335
CG6770	12668	12668	9826	9826	3.15e-80	2.59e-79	22494	10349	6883	6883	9520	9520	1.59e-94	3.47e-94	0.000722348	0.000322177	1	1	0.366513	0.467924	0.366513	0.101411	78.3274
CG6415	2187	2187	1108	1108	4.12e-80	3.38e-79	3295	404	405	405	372	372	0.250955	0.0467458	3.92926e-21	6.44e-21	1	1	0.980995	-0.122619	0.980995	1.10361	47.0589
CG5320	7398	7398	9883	9883	6.63e-80	5.43e-79	17281	3833	5987	5987	3526	3526	6.04e-142	1.96e-141	4.55086e-20	7.08e-20	1	1	-0.417814	-0.763801	0.417814	0.345987	54.7019
CG8905	5207	5207	3451	3451	6.9e-80	5.63e-79	8658	2178	1750	1750	2004	2004	3.62e-05	9.71e-06	3.06113e-12	2.98e-12	1	1	0.593438	0.195528	0.593438	0.39791	59.8617
CG1919	9261	9261	6862	6862	7.75e-80	6.31e-79	16123	1371	1745	1745	1262	1262	1.27e-18	6.57e-19	6.34877e-55	3.08e-54	1	1	0.432539	-0.467515	0.432539	0.900054	32.4584
CG3734	1859	1859	3197	3197	8.56e-80	6.96e-79	5056	576	1533	1533	530	530	1.87e-112	4.86e-112	9.62059e-20	1.47e-19	1	1	-0.782192	-1.53229	0.782192	0.750101	51.0471
CG8472	15382	15382	12241	12241	8.9e-80	7.22e-79	27623	6424	6343	6343	5909	5909	9.14e-05	2.39e-05	4.40087e-43	1.63e-42	1	1	0.329522	-0.102251	0.329522	0.431773	43.2844
CG2059	533	533	1339	1339	9.01e-80	7.29e-79	1872	360	518	518	332	332	1.89e-10	6.96e-11	5.67622e-08	3.96e-08	1	1	-1.32895	-0.641769	1.32895	0.68718	65.9159
CG2139	4693	4693	3037	3037	1.21e-79	9.8e-79	7730	1765	1664	1664	1624	1624	0.496421	0.0880653	7.21033e-28	1.6e-27	1	1	0.627864	-0.0351038	0.627864	0.662967	48.6403
CG18228	143	143	655	655	5e-79	4.03e-78	798	98	232	232	91	91	2.4e-15	1.09e-15	0.000183265	8.83e-05	1	1	-2.19548	-1.35019	2.19548	0.845293	72.2014
CG32582	9	9	308	308	6.13e-79	4.93e-78	317	2	187	187	2	2	4.58e-53	5.52e-53	0.223528	0.0670738	1	0	-5.09686	-6.54689	5.09686	1.45003	77.8516
CG7756	46	46	428	428	1.06e-78	8.55e-78	474	35	155	155	33	33	4.18e-20	2.27e-20	0.00745811	0.00290659	1	1	-3.21791	-2.23173	3.21791	0.986175	76.5424
CG1640	9795	9795	7340	7340	1.12e-78	8.95e-78	17135	3265	2976	2976	3004	3004	0.726979	0.124632	2.207e-20	3.5e-20	1	1	0.416265	0.0135103	0.416265	0.402755	50.8248
CG3869	5588	5588	3778	3778	1.9e-78	1.52e-77	9366	3466	2355	2355	3189	3189	3.7e-29	2.64e-29	0.0103087	0.0039363	1	1	0.564709	0.437377	0.564709	0.127332	81.6005
CG10246	647	647	142	142	9.48e-78	7.57e-77	789	381	62	62	351	351	4.52e-50	5.1e-50	0.196596	0.0597	1	0	2.18787	2.50113	2.18787	0.313256	87.4754
CG9812	5582	5582	7730	7730	1.29e-77	1.02e-76	13312	1168	2574	2574	1075	1075	8.71e-140	2.78e-139	1.19665e-43	4.52e-43	1	1	-0.469686	-1.25968	0.469686	0.789989	37.2863
CG3800	6843	6843	4832	4832	1.3e-77	1.03e-76	11675	11038	3634	3634	10153	10153	4.940656e-324	4.446591e-323	6.4403e-142	9.09e-141	1	1	0.502008	1.48228	0.502008	0.980267	33.8674
CG5269	1262	1262	493	493	1.35e-77	1.07e-76	1755	747	314	314	688	688	8.68e-33	6.8e-33	0.0744849	0.0245502	1	0	1.35605	1.13164	1.35605	0.224408	85.8011
CG5729	1431	1431	2607	2607	2.02e-77	1.6e-76	4038	542	586	586	499	499	0.00900066	0.00198518	3.10087e-10	2.63e-10	1	1	-0.865367	-0.231861	0.865367	0.633506	57.7345
CG6030	25129	25129	21127	21127	2.44e-77	1.93e-76	46256	8117	8867	8867	7467	7467	6.42e-28	4.39e-28	6.31219e-80	4.74e-79	1	1	0.250265	-0.247917	0.250265	0.498183	33.4379
CG7392	2553	2553	1392	1392	2.89e-77	2.28e-76	3945	1272	695	695	1170	1170	2.57e-28	1.78e-28	0.143209	0.0447617	1	0	0.875034	0.751424	0.875034	0.123611	87.6222
CG16727	1113	1113	403	403	5.65e-77	4.45e-76	1516	231	91	91	213	213	1.99e-12	8.04e-13	0.230427	0.0689332	1	0	1.4656	1.22691	1.4656	0.238687	85.9949
CG6330	1032	1032	2055	2055	5.75e-77	4.52e-76	3087	594	950	950	547	547	1.41e-25	9.05e-26	0.0399029	0.0137598	1	0	-0.993695	-0.796387	0.993695	0.197309	83.4334
CG5436	1330	1330	2466	2466	6.37e-77	4.99e-76	3796	253	538	538	233	233	1.29e-28	9.01e-29	0.0110643	0.00419933	1	1	-0.890747	-1.20728	0.890747	0.31653	73.7815
CG30141	1252	1252	490	490	9.09e-77	7.11e-76	1742	591	449	449	544	544	0.00283594	0.000657448	3.31621e-19	4.92e-19	1	1	1.35338	0.276891	1.35338	1.07649	55.6977
CG7780	2000	2000	996	996	1.98e-76	1.54e-75	2996	364	472	472	335	335	1.6e-06	4.75e-07	4.2143e-38	1.33e-37	1	1	1.00578	-0.494626	1.00578	1.50041	40.1319
CG2249	6931	6931	4921	4921	2.13e-76	1.66e-75	11852	3436	3161	3161	3161	3161	1	0.164833	8.21129e-28	1.81e-27	1	1	0.494112	0	0.494112	0.494112	50
CG31464	1	1	258	258	5.61e-76	4.37e-75	259	2	145	145	2	2	1.22e-40	1.14e-40	0.297878	0.0867848	1	0	-8.01123	-6.17991	8.01123	1.83132	81.3939
CG4984	2681	2681	1496	1496	5.64e-76	4.38e-75	4177	685	812	812	631	631	2.09e-06	6.16e-07	1.11462e-41	3.9e-41	1	1	0.841661	-0.36384	0.841661	1.2055	41.1136
CG30052	454	454	61	61	2.76e-75	2.13e-74	515	175	29	29	161	161	2.23e-23	1.34e-23	0.252266	0.074783	1	0	2.89581	2.47294	2.89581	0.422875	87.2578
CG9552	1023	1023	357	357	1.21e-74	9.35e-74	1380	738	239	239	679	679	1.71e-49	1.9e-49	0.961251	0.242372	1	0	1.51881	1.5064	1.51881	0.0124092	99.1896
CG11527	4125	4125	2629	2629	1.53e-74	1.18e-73	6754	1168	1097	1097	1075	1075	0.652289	0.113043	2.73579e-21	4.53e-21	1	1	0.64988	-0.0292269	0.64988	0.679107	48.9004
CG6424	3446	3446	2097	2097	5.48e-74	4.22e-73	5543	1648	1255	1255	1516	1516	7.71e-07	2.34e-07	7.91718e-11	7.01e-11	1	1	0.716596	0.272582	0.716596	0.444013	61.7431
CG11390	20951	20951	24842	24842	6.3e-74	4.84e-73	45793	5494	9614	9614	5054	5054	2.973722e-315	2.359911e-314	1.2347e-129	1.57e-128	1	1	-0.245762	-0.927711	0.245762	0.681949	26.4912
CG5966	1927	1927	3225	3225	9.4e-74	7.21e-73	5152	637	1463	1463	586	586	4.09e-86	7.99e-86	9.92841e-13	1e-12	1	1	-0.742943	-1.31996	0.742943	0.577015	56.2854
CG2330	3777	3777	2364	2364	3.24e-73	2.48e-72	6141	884	991	991	814	814	3.39e-05	9.11e-06	6.03639e-35	1.71e-34	1	1	0.676011	-0.283856	0.676011	0.959867	41.324
CG7970	1761	1761	846	846	3.66e-73	2.8e-72	2607	637	437	437	586	586	3.57e-06	1.03e-06	8.46258e-09	6.34e-09	1	1	1.05767	0.423267	1.05767	0.634398	62.5074
CG31077	1681	1681	791	791	4.41e-73	3.36e-72	2472	325	482	482	299	299	6.08e-11	2.29e-11	7.66821e-49	3.33e-48	1	1	1.08757	-0.688888	1.08757	1.77646	37.9734
CG17754	4862	4862	3243	3243	1.08e-72	8.23e-72	8105	625	476	476	575	575	0.00248746	0.000579441	0.00119683	0.000519734	1	1	0.584221	0.2726	0.584221	0.31162	65.2148
CG33509	459	459	68	68	2.84e-72	2.16e-71	527	86	34	34	80	80	1.96e-05	5.38e-06	2.95986e-05	1.56e-05	1	1	2.75489	1.23447	2.75489	1.52042	64.4371
CG6125	1939	1939	3225	3225	3.01e-72	2.28e-71	5164	622	1294	1294	573	573	6.21e-64	8.95e-64	9.89666e-08	6.73e-08	1	1	-0.733986	-1.17523	0.733986	0.441244	62.4547
CG8938	47876	47876	42478	42478	4e-72	3.03e-71	90354	11976	14764	14764	11016	11016	7.13e-121	2e-120	5.3325e-186	1.12e-184	1	1	0.172587	-0.422483	0.172587	0.59507	22.4823
CG1979	287	287	10	10	1.03e-71	7.76e-71	297	105	5	5	97	97	3.46e-23	2.06e-23	0.546437	0.148224	1	0	4.84298	4.27798	4.84298	0.564994	89.5526
CG3344	2014	2014	1034	1034	1.4e-71	1.05e-70	3048	537	982	982	494	494	1.75e-37	1.52e-37	1.20323e-95	1.07e-94	1	1	0.961827	-0.991212	0.961827	1.95304	32.9973
CG9897	1232	1232	2286	2286	1.41e-71	1.06e-70	3518	585	1406	1406	539	539	7.37e-89	1.49e-88	2.75604e-08	1.98e-08	1	1	-0.891823	-1.38324	0.891823	0.491416	64.4735
CG8791	1960	1960	3245	3245	1.43e-71	1.07e-70	5205	619	516	516	570	570	0.107732	0.0211161	2.61861e-19	3.9e-19	1	1	-0.727365	0.143591	0.727365	0.870956	45.5081
CG16974	5135	5135	3479	3479	1.48e-71	1.11e-70	8614	2335	1822	1822	2148	2148	2.46e-07	7.72e-08	7.00544e-09	5.28e-09	1	1	0.561692	0.237471	0.561692	0.324221	63.4026
CG1913	24753	24753	28893	28893	1.72e-71	1.29e-70	53646	13641	12127	12127	12548	12548	0.00749961	0.00166664	1.57849e-34	4.41e-34	1	1	-0.223117	0.0492347	0.223117	0.272351	45.0315
CG4020	3791	3791	2393	2393	3.36e-71	2.51e-70	6184	1163	936	936	1070	1070	0.00297329	0.000687544	3.34138e-10	2.82e-10	1	1	0.663758	0.19303	0.663758	0.470728	58.5074
CG8932	298	298	903	903	3.9e-71	2.91e-70	1201	109	437	437	101	101	8.67e-51	9.95e-51	0.00550221	0.00218633	1	1	-1.59941	-2.11328	1.59941	0.513864	75.684
CG14438	768	768	1633	1633	4.01e-71	2.98e-70	2401	955	780	780	879	879	0.0161009	0.00347379	1.03728e-40	3.54e-40	1	1	-1.08835	0.172389	1.08835	1.26074	46.3307
CG7567	241	241	1	1	6.88e-71	5.11e-70	242	135	0	1	125	125	2.99e-36	2.54e-36	1	0.246323	1	0	7.91289	6.96578	7.91289	0.947105	89.3103
CG18278	9	9	280	280	7.1e-71	5.26e-70	289	17	126	126	16	16	2.23e-22	1.29e-22	0.0014999	0.000643039	1	1	-4.95936	-2.97728	4.95936	1.98208	71.4457
CG6008	8163	8163	6046	6046	9.33e-71	6.9e-70	14209	2924	2356	2356	2690	2690	2.74e-06	8.01e-07	3.90613e-07	2.5e-07	1	1	0.433118	0.191267	0.433118	0.241852	64.1685
CG32512	1519	1519	694	694	2.52e-70	1.86e-69	2213	424	259	259	390	390	3.06e-07	9.57e-08	6.77188e-05	3.43e-05	1	1	1.13011	0.590522	1.13011	0.539592	67.6834
CG9928	1886	1886	952	952	6.27e-70	4.62e-69	2838	548	463	463	505	505	0.187546	0.0355759	4.34951e-15	5.09e-15	1	1	0.986296	0.125271	0.986296	0.861025	53.3906
CG4484	4835	4835	3250	3250	6.74e-70	4.96e-69	8085	802	1324	1324	738	738	1.78e-38	1.59e-38	3.23518e-85	2.59e-84	1	1	0.573076	-0.84321	0.573076	1.41629	28.807
CG32626	3378	3378	4990	4990	7.67e-70	5.63e-69	8368	1757	2140	2140	1617	1617	1.46e-17	7.28e-18	0.00590171	0.00233412	1	1	-0.56287	-0.404291	0.56287	0.158579	78.0193
CG9459	828	828	1709	1709	9.51e-70	6.97e-69	2537	236	897	897	218	218	3.35e-98	7.57e-98	2.07172e-16	2.61e-16	1	1	-1.04545	-2.04078	1.04545	0.99533	51.228
CG33126	4591	4591	3056	3056	2.4e-69	1.75e-68	7647	1631	1148	1148	1501	1501	7.43e-12	2.93e-12	0.0024651	0.00102724	1	1	0.587164	0.386801	0.587164	0.200363	74.558
CG5663	2721	2721	1574	1574	2.8e-69	2.05e-68	4295	1082	616	616	996	996	2.46e-21	1.39e-21	0.276366	0.0811437	1	0	0.789701	0.693215	0.789701	0.096486	89.1122
CG32277	1095	1095	421	421	2.93e-69	2.14e-68	1516	297	219	219	274	274	0.0149303	0.00322885	1.32332e-11	1.23e-11	1	1	1.37904	0.323245	1.37904	1.05579	56.6379
CG7002	2273	2273	1239	1239	4.96e-69	3.61e-68	3512	920	246	246	847	847	1.02e-77	1.79e-77	9.5097e-16	1.16e-15	1	1	0.875421	1.7837	0.875421	0.908282	49.0789
CG5779	342	342	29	29	5.43e-69	3.94e-68	371	24	9	9	23	23	0.0200616	0.00428164	0.00130236	0.000563167	1	1	3.55987	1.35364	3.55987	2.20623	61.7379
CG34455	2697	2697	4143	4143	7.38e-69	5.35e-68	6840	817	1996	1996	752	752	7.75e-129	2.32e-128	1.78233e-29	4.19e-29	1	1	-0.61932	-1.40831	0.61932	0.788987	43.9762
CG6484	5647	5647	3935	3935	9.07e-69	6.56e-68	9582	981	1573	1573	903	903	1.07e-41	1.02e-41	5.34949e-89	4.51e-88	1	1	0.521121	-0.800721	0.521121	1.32184	28.2763
CG8708	299	299	16	16	9.65e-69	6.97e-68	315	100	14	14	92	92	3.06e-15	1.39e-15	0.00806199	0.00312556	1	1	4.224	2.71621	4.224	1.50779	73.6942
CG2982	407	407	53	53	1.07e-68	7.71e-68	460	1381	98	98	1271	1271	1.19e-260	7.73e-260	0.00440294	0.00177336	1	1	2.94096	3.69704	2.94096	0.756074	79.5492
CG4675	2333	2333	1286	1286	1.16e-68	8.36e-68	3619	688	819	819	633	633	1.17e-06	3.49e-07	6.07128e-42	2.14e-41	1	1	0.859296	-0.371658	0.859296	1.23095	41.1097
CG16765	2980	2980	1779	1779	1.74e-68	1.25e-67	4759	911	813	813	838	838	0.554761	0.0976242	4.51052e-17	5.94e-17	1	1	0.744246	0.0436949	0.744246	0.700551	51.5121
CG31689	1404	1404	2486	2486	3.66e-68	2.63e-67	3890	981	1628	1628	903	903	1.37e-47	1.47e-47	0.749468	0.195438	1	0	-0.824283	-0.850303	0.824283	0.0260194	96.94
CG3868	4604	4604	3081	3081	5.91e-68	4.23e-67	7685	2132	1464	1464	1962	1962	1.8e-17	8.92e-18	0.00902404	0.00347985	1	1	0.579489	0.422409	0.579489	0.15708	78.6741
CG12140	3569	3569	5193	5193	1e-67	7.17e-67	8762	1399	2498	2498	1287	1287	1.31e-87	2.61e-87	9.88629e-13	1e-12	1	1	-0.541048	-0.956761	0.541048	0.415713	56.55
CG6633	625	625	1397	1397	1.53e-67	1.09e-66	2022	128	570	570	118	118	6.73e-72	1.1e-71	7.85635e-13	8.02e-13	1	1	-1.1604	-2.27218	1.1604	1.11177	51.0702
CG33956	3615	3615	5245	5245	1.79e-67	1.28e-66	8860	1511	2743	2743	1390	1390	5.62e-100	1.29e-99	4.37031e-15	5.12e-15	1	1	-0.536947	-0.98067	0.536947	0.443723	54.7531
CG14027	229	229	1	1	2.68e-67	1.9e-66	230	109	7	7	101	101	1.84e-22	1.08e-22	0.00174065	0.000740178	1	1	7.8392	3.85086	7.8392	3.98835	66.2792
CG18779	25	25	323	323	3.49e-67	2.47e-66	348	7	235	235	7	7	2.58e-60	3.54e-60	0.0261778	0.00933104	1	0	-3.69153	-5.06916	3.69153	1.37763	72.8234
CG18417	228	228	0	1	5.33e-67	3.77e-66	229	92	1	1	85	85	2.25e-24	1.39e-24	0.472126	0.130489	1	0	7.83289	6.40939	7.83289	1.4235	84.6214
CG9766	277	277	12	12	1.18e-66	8.35e-66	289	46	3	3	43	43	4.62e-10	1.68e-10	0.443296	0.12369	1	0	4.52878	3.8413	4.52878	0.687477	86.8205
CG4581	4276	4276	2827	2827	1.3e-66	9.19e-66	7103	1993	1252	1252	1834	1834	9.63e-26	6.2e-26	0.467881	0.129563	1	0	0.59699	0.550759	0.59699	0.0462309	92.8126
CG11590	271	271	831	831	1.39e-66	9.79e-66	1102	185	276	276	171	171	7.78e-07	2.36e-07	1.1814e-07	7.99e-08	1	1	-1.61656	-0.690672	1.61656	0.925884	63.5829
CG9579	1438	1438	2514	2514	2.31e-66	1.62e-65	3952	759	1179	1179	699	699	1.07e-28	7.5e-29	0.54147	0.147088	1	0	-0.805921	-0.754199	0.805921	0.0517216	93.9693
CG4650	28	28	329	329	2.46e-66	1.72e-65	357	9	89	89	9	9	1.1e-17	5.5e-18	0.677602	0.179055	1	0	-3.55459	-3.30581	3.55459	0.24878	93.4589
CG11853	604	604	1355	1355	5.02e-66	3.51e-65	1959	294	1461	1461	271	271	5.05e-197	2.41e-196	8.18175e-28	1.81e-27	1	1	-1.16567	-2.43059	1.16567	1.26492	47.9584
CG14021	1977	1977	3204	3204	1.18e-65	8.22e-65	5181	271	1018	1018	250	250	3.54e-110	9e-110	1.25393e-37	3.89e-37	1	1	-0.696561	-2.02574	0.696561	1.32918	34.3856
CG10026	424	424	1077	1077	1.2e-65	8.36e-65	1501	75	319	319	69	69	1.61e-39	1.47e-39	2.33447e-05	1.25e-05	1	1	-1.34488	-2.20889	1.34488	0.864006	60.885
CG5508	5204	5204	7098	7098	1.46e-65	1.01e-64	12302	2307	4066	4066	2122	2122	5.77e-137	1.81e-136	4.8373e-26	9.96e-26	1	1	-0.447792	-0.938186	0.447792	0.490394	47.7295
CG13377	1330	1330	592	592	5.1e-65	3.55e-64	1922	383	227	227	353	353	1.89e-07	5.97e-08	0.000224502	0.000107305	1	1	1.16776	0.636976	1.16776	0.530781	68.7507
CG2022	959	959	1853	1853	1.03e-64	7.18e-64	2812	507	1041	1041	467	467	1.75e-50	2e-50	0.0384281	0.0132792	1	0	-0.95026	-1.15648	0.95026	0.206215	82.1686
CG13795	211	211	715	715	1.05e-64	7.3e-64	926	74	652	652	69	69	6.47e-120	1.79e-119	5.32694e-13	5.52e-13	1	1	-1.7607	-3.2402	1.7607	1.4795	54.3392
CG1089	1105	1105	2053	2053	1.12e-64	7.75e-64	3158	474	1011	1011	436	436	7.8e-53	9.35e-53	0.00123642	0.000535979	1	1	-0.893687	-1.21338	0.893687	0.319696	73.6525
CG31686	144	144	587	587	2.94e-64	2.03e-63	731	15	223	223	14	14	1.32e-49	1.47e-49	9.39805e-08	6.41e-08	1	1	-2.02729	-3.99354	2.02729	1.96625	50.7642
CG10962	838	838	283	283	3.44e-64	2.37e-63	1121	77	24	24	71	71	1.46e-06	4.35e-07	1	0.246323	1	0	1.56615	1.56478	1.56615	0.00136357	99.913
CG16820	769	769	243	243	3.58e-64	2.46e-63	1012	225	77	77	207	207	6.45e-15	2.89e-15	0.311347	0.0903016	1	0	1.66203	1.4267	1.66203	0.235327	87.5971
CG1299	2355	2355	1336	1336	8.13e-64	5.59e-63	3691	576	556	556	530	530	0.448094	0.0800018	1.53524e-18	2.21e-18	1	1	0.817807	-0.0690925	0.817807	0.8869	47.9735
CG8128	4601	4601	3125	3125	1.41e-63	9.69e-63	7726	827	817	817	761	761	0.166169	0.0317445	1.74031e-16	2.2e-16	1	1	0.558091	-0.10244	0.558091	0.660531	45.7969
CG1746	125986	125986	117700	117700	3.15e-63	2.15e-62	243686	48161	52171	52171	44299	44299	7.78e-142	2.52e-141	5.1082e-203	1.18e-201	1	1	0.0981491	-0.235974	0.0981491	0.334123	22.7054
CG2201	1487	1487	709	709	4.67e-63	3.19e-62	2196	1207	376	376	1111	1111	2.47e-84	4.69e-84	4.84871e-06	2.78e-06	1	1	1.06855	1.56305	1.06855	0.494507	68.3628
CG1908	1078	1078	436	436	7.11e-63	4.85e-62	1514	570	357	357	525	525	1.7e-08	5.67e-09	6.05828e-09	4.59e-09	1	1	1.30596	0.556393	1.30596	0.749564	63.5341
CG9572	5571	5571	3943	3943	9.17e-63	6.24e-62	9514	1872	1998	1998	1722	1722	6.46e-06	1.84e-06	4.62954e-37	1.41e-36	1	1	0.498643	-0.214471	0.498643	0.713114	41.1504
CG1783	1061	1061	430	430	1.07e-61	7.25e-61	1491	1210	300	300	1113	1113	5.77e-110	1.46e-109	2.4454e-06	1.45e-06	1	1	1.30302	1.89142	1.30302	0.588403	68.8909
CG31445	911	911	337	337	2.31e-61	1.57e-60	1248	237	174	174	218	218	0.0297389	0.0062384	2.16971e-10	1.87e-10	1	1	1.4347	0.325241	1.4347	1.10946	56.3919
CG17821	0	1	209	209	2.56e-61	1.74e-60	210	0	27	27	0	1	2.16e-07	6.8e-08	0.221891	0.0666477	1	0	-7.70736	-4.75489	7.70736	2.95247	72.3028
CG31769	2606	2606	1547	1547	3.21e-61	2.17e-60	4153	701	601	601	645	645	0.223143	0.0418929	6.09156e-12	5.79e-12	1	1	0.752364	0.101934	0.752364	0.65043	53.6333
CG5887	18611	18611	15565	15565	4.93e-61	3.33e-60	34176	8139	11419	11419	7487	7487	4.56e-181	1.98e-180	5.3428e-237	1.56e-235	1	1	0.25785	-0.608977	0.25785	0.866827	22.9266
CG32191	1109	1109	464	464	5.24e-61	3.53e-60	1573	199	173	173	184	184	0.59669	0.104232	1.80998e-11	1.67e-11	1	1	1.25706	0.0889337	1.25706	1.16813	51.8335
CG13374	637	637	1365	1365	1.07e-60	7.23e-60	2002	275	1102	1102	253	253	1.85e-126	5.41e-126	1.10192e-17	1.51e-17	1	1	-1.09954	-2.12291	1.09954	1.02338	51.7937
CG6730	310	310	29	29	1.54e-60	1.04e-59	339	43	15	15	40	40	0.00101585	0.000244974	0.000243607	0.000115985	1	1	3.41814	1.41504	3.41814	2.00311	63.0508
CG33110	1075	1075	445	445	2.73e-60	1.83e-59	1520	417	108	108	384	384	2.68e-37	2.32e-37	0.00140077	0.000603598	1	1	1.27246	1.83007	1.27246	0.557616	69.5305
CG9906	9	9	242	242	5.41e-60	3.62e-59	251	4	101	101	4	4	2.45e-25	1.56e-25	1	0.246323	1	0	-4.74894	-4.65821	4.74894	0.0907268	98.1254
CG31091	5	5	225	225	6.08e-60	4.07e-59	230	3	103	103	3	3	4.9e-27	3.29e-27	0.710787	0.186738	1	0	-5.49185	-5.10154	5.49185	0.390315	93.3644
CG2852	4359	4359	2965	2965	6.38e-60	4.26e-59	7324	3413	1307	1307	3140	3140	3.94e-171	1.62e-170	2.56111e-34	7.1e-34	1	1	0.555965	1.26451	0.555965	0.70854	43.967
CG3200	1213	1213	538	538	7.52e-60	5.01e-59	1751	244	153	153	225	225	0.000250346	6.34e-05	0.000341827	0.000159714	1	1	1.1729	0.556393	1.1729	0.616508	65.5468
CG6461	1027	1027	1902	1902	1.54e-59	1.03e-58	2929	1434	1774	1774	1320	1320	3.39e-16	1.6e-16	1.64076e-09	1.3e-09	1	1	-0.889081	-0.426468	0.889081	0.462613	65.7753
CG33884	0	1	203	203	1.59e-59	1.06e-58	204	1	29	29	1	1	5.77e-08	1.87e-08	0.240453	0.0716097	1	0	-7.66534	-4.85798	7.66534	2.80735	73.1936
CG9964	1585	1585	798	798	2.14e-59	1.42e-58	2383	178	206	206	164	164	0.0329087	0.00687786	8.2258e-16	1.01e-15	1	1	0.990022	-0.328949	0.990022	1.31897	42.8768
CG15096	9871	9871	12288	12288	2.38e-59	1.57e-58	22159	1326	4210	4210	1220	1220	4.940656e-324	4.446591e-323	3.4985e-206	8.42e-205	1	1	-0.315982	-1.78694	0.315982	1.47096	17.6829
CG10514	4614	4614	3183	3183	2.61e-59	1.72e-58	7797	1301	1255	1255	1197	1197	0.249684	0.0465143	2.54832e-19	3.8e-19	1	1	0.535631	-0.0682642	0.535631	0.603895	47.0047
CG4572	4306	4306	5947	5947	3.04e-59	2e-58	10253	1862	2740	2740	1713	1713	8.25e-54	1.01e-53	6.4101e-05	3.26e-05	1	1	-0.465814	-0.677651	0.465814	0.211837	68.7395
CG18578	2084	2084	1165	1165	3.94e-59	2.59e-58	3249	701	638	638	645	645	0.866978	0.146223	1.32066e-17	1.8e-17	1	1	0.839025	0.0157427	0.839025	0.823283	50.4735
CG8745	3369	3369	4834	4834	4.47e-59	2.93e-58	8203	867	1556	1556	798	798	7.84e-56	1e-55	3.05041e-10	2.59e-10	1	1	-0.520897	-0.963381	0.520897	0.442484	54.0697
CG18636	3	3	212	212	6.29e-59	4.13e-58	215	0	41	41	0	1	1.96e-11	7.55e-12	0.512448	0.140059	1	0	-6.14296	-5.35755	6.14296	0.785406	88.6639
CG6421	617	617	174	174	7.24e-59	4.74e-58	791	157	95	95	145	145	0.00150885	0.000357874	1.53762e-07	1.03e-07	1	1	1.82618	0.610053	1.82618	1.21613	60.0261
CG11218	1582	1582	799	799	7.51e-59	4.91e-58	2381	395	440	440	364	364	0.00812827	0.00180002	6.03579e-26	1.24e-25	1	1	0.985482	-0.273565	0.985482	1.25905	43.906
CG8446	21353	21353	24826	24826	8.98e-59	5.86e-58	46179	5094	8987	8987	4686	4686	4.42e-301	3.36e-300	7.5833e-138	1.03e-136	1	1	-0.217413	-0.939483	0.217413	0.72207	23.1418
CG3524	9404	9404	7320	7320	1.62e-58	1.06e-57	16724	2489	4083	4083	2290	2290	4.4e-113	1.15e-112	6.8263e-169	1.23e-167	1	1	0.361431	-0.834282	0.361431	1.19571	23.2111
CG31410	1746	1746	2832	2832	2.1e-58	1.36e-57	4578	161	1489	1489	149	149	3.94e-278	2.77e-277	1.5038e-123	1.77e-122	1	1	-0.697768	-3.32096	0.697768	2.62319	21.011
CG5711	14650	14650	17536	17536	2.92e-58	1.89e-57	32186	1922	8518	8518	1768	1768	4.940656e-324	4.446591e-323	0	0	1	1	-0.259419	-2.2684	0.259419	2.00898	11.4362
CG31414	427	427	1033	1033	3.85e-58	2.5e-57	1460	82	458	458	76	76	1.63e-67	2.49e-67	1.33514e-12	1.34e-12	1	1	-1.27453	-2.59128	1.27453	1.31674	49.1855
CG3244	6711	6711	8705	8705	3.87e-58	2.51e-57	15416	1442	3348	3348	1327	1327	3.27e-198	1.57e-197	6.94636e-79	5.11e-78	1	1	-0.375317	-1.33513	0.375317	0.959815	28.1108
CG14724	31325	31325	27435	27435	5.78e-58	3.74e-57	58760	11025	12028	12028	10141	10141	8.19e-37	7.05e-37	3.34426e-82	2.58e-81	1	1	0.191297	-0.246197	0.191297	0.437494	30.423
CG1826	566	566	1241	1241	5.86e-58	3.78e-57	1807	681	198	198	627	627	1.19e-52	1.42e-52	8.0195e-104	7.69e-103	1	1	-1.13263	1.66297	1.13263	2.79559	28.8331
CG7176	24594	24594	21166	21166	8.17e-58	5.26e-57	45760	9380	8527	8527	8628	8628	0.445171	0.0795292	1.23469e-14	1.41e-14	1	1	0.216558	0.0169879	0.216558	0.19957	52.0412
CG13597	0	1	197	197	9.91e-58	6.37e-57	198	2	65	65	2	2	3.09e-17	1.52e-17	0.158379	0.049066	1	0	-7.62205	-5.02237	7.62205	2.59968	74.5671
CG31199	1271	1271	2211	2211	1.06e-57	6.81e-57	3482	253	1174	1174	233	233	3.71e-151	1.32e-150	1.52351e-45	6.02e-45	1	1	-0.798735	-2.33303	0.798735	1.5343	34.2359
CG5177	3602	3602	2369	2369	1.26e-57	8.08e-57	5971	1212	1347	1347	1115	1115	3.18e-06	9.24e-07	1.9934e-36	5.95e-36	1	1	0.60452	-0.272706	0.60452	0.877226	40.7978
CG4830	37	37	321	321	1.27e-57	8.11e-57	358	261	299	299	241	241	0.0140965	0.00305578	4.76636e-30	1.14e-29	1	1	-3.11698	-0.311112	3.11698	2.80586	52.6264
CG14745	2250	2250	1304	1304	2.99e-57	1.91e-56	3554	1130	1140	1140	1040	1040	0.0339529	0.00708619	5.28585e-31	1.3e-30	1	1	0.786981	-0.13245	0.786981	0.919431	46.119
CG12283	539	539	137	137	3.16e-57	2.02e-56	676	470	135	135	433	433	2.22e-37	1.93e-37	0.148235	0.0462031	1	0	1.97611	1.68141	1.97611	0.294702	87.0222
CG11128	1291	1291	2232	2232	3.74e-57	2.38e-56	3523	1390	1002	1002	1279	1279	7.22e-09	2.45e-09	5.6655e-48	2.41e-47	1	1	-0.789848	0.352134	0.789848	1.14198	40.886
CG2168	23267	23267	26825	26825	6.39e-57	4.07e-56	50092	29090	15176	15176	26758	26758	4.940656e-324	4.446591e-323	0	0	1	1	-0.205293	0.818179	0.205293	1.02347	16.7073
CG33265	386	386	961	961	7.16e-57	4.54e-56	1347	103	824	824	95	95	1.05e-145	3.53e-145	2.74908e-27	5.91e-27	1	1	-1.31594	-3.11664	1.31594	1.80071	42.2228
CG3599	233	233	711	711	7.57e-57	4.8e-56	944	35	571	571	33	33	8.99e-128	2.67e-127	2.25799e-25	4.55e-25	1	1	-1.60952	-4.11295	1.60952	2.50343	39.1329
CG1801	1	1	194	194	7.81e-57	4.94e-56	195	86	39	39	80	80	0.000215489	5.49e-05	2.02929e-43	7.58e-43	1	1	-7.59991	1.03653	7.59991	8.63644	46.808
CG10287	4755	4755	3330	3330	8.98e-57	5.67e-56	8085	724	753	753	666	666	0.0223967	0.00476205	1.22651e-16	1.56e-16	1	1	0.513923	-0.177128	0.513923	0.691051	42.6501
CG9336	3230	3230	2079	2079	1.51e-56	9.51e-56	5309	1283	1360	1360	1181	1181	0.000411662	0.000102307	5.40925e-33	1.44e-32	1	1	0.635644	-0.203598	0.635644	0.839242	43.0979
CG7111	19906	19906	16870	16870	1.78e-56	1.12e-55	36776	18201	10500	10500	16742	16742	1.192906e-315	9.512717e-315	6.9034e-77	4.98e-76	1	1	0.238743	0.673083	0.238743	0.434339	35.4701
CG3410	5	5	213	213	1.9e-56	1.2e-55	218	0	143	143	0	1	1.3e-41	1.24e-41	0.408799	0.114966	1	0	-5.41278	-7.15987	5.41278	1.74709	75.5989
CG8036	31980	31980	28100	28100	1.91e-56	1.2e-55	60080	7162	12412	12412	6588	6588	4.940656e-324	4.446591e-323	0	0	1	1	0.1866	-0.913823	0.1866	1.10042	14.4986
CG7106	192	192	0	1	3.09e-56	1.94e-55	193	109	0	1	101	101	4.06e-29	2.89e-29	1	0.246323	1	0	7.58496	6.65821	7.58496	0.926751	89.1121
CG32030	4951	4951	3503	3503	4.53e-56	2.84e-55	8454	2101	1725	1725	1933	1933	0.000618485	0.000151778	6.03418e-09	4.58e-09	1	1	0.499129	0.164245	0.499129	0.334884	59.8467
CG13075	407	407	987	987	7.45e-56	4.66e-55	1394	50	247	247	46	46	2.01e-34	1.64e-34	1.02387e-06	6.33e-07	1	1	-1.27802	-2.42481	1.27802	1.14678	52.7061
CG11425	457	457	1061	1061	1.72e-55	1.07e-54	1518	130	622	622	120	120	1.69e-82	3.15e-82	3.25801e-13	3.43e-13	1	1	-1.21516	-2.37388	1.21516	1.15872	51.1887
CG34099	844	844	318	318	1.96e-55	1.22e-54	1162	532	145	145	490	490	1.1e-44	1.1e-44	0.0369104	0.0128089	1	0	1.40822	1.75673	1.40822	0.348513	80.1613
CG5116	1453	1453	727	727	2.2e-55	1.37e-54	2180	802	329	329	738	738	1.12e-36	9.56e-37	0.162774	0.0503004	1	0	0.999007	1.16553	0.999007	0.166526	85.7125
CG10469	420	420	1003	1003	2.99e-55	1.86e-54	1423	166	492	492	153	153	2.12e-42	2.05e-42	0.00680827	0.00266645	1	1	-1.25586	-1.68513	1.25586	0.429266	74.5262
CG5506	8429	8429	6518	6518	3.65e-55	2.26e-54	14947	2210	2453	2453	2033	2033	3.84e-10	1.4e-10	9.57234e-39	3.1e-38	1	1	0.370932	-0.270937	0.370932	0.641869	36.6244
CG33013	7	7	217	217	3.91e-55	2.42e-54	224	3	144	144	3	3	5.94e-39	5.33e-39	0.745798	0.194707	1	0	-4.9542	-5.58496	4.9542	0.630766	88.706
CG7497	1088	1088	477	477	4.88e-55	3.02e-54	1565	310	114	114	286	286	3.7e-18	1.88e-18	0.463826	0.128586	1	0	1.18962	1.32698	1.18962	0.137364	89.6484
CG3699	12163	12163	14718	14718	8.62e-55	5.32e-54	26881	1078	3592	3592	992	992	0	0	7.7021e-211	1.91e-209	1	1	-0.275083	-1.85638	0.275083	1.58129	14.8183
CG6503	3308	3308	4700	4700	9.43e-55	5.81e-54	8008	1199	2436	2436	1103	1103	9.11e-114	2.41e-113	1.99388e-25	4.03e-25	1	1	-0.506702	-1.14308	0.506702	0.63638	44.3277
CG12224	187	187	0	1	9.64e-55	5.92e-54	188	114	0	1	105	105	2.64e-30	1.94e-30	1	0.246323	1	0	7.54689	6.71425	7.54689	0.832649	90.0633
CG6764	1414	1414	2368	2368	9.95e-55	6.11e-54	3782	2326	1896	1896	2140	2140	0.000130205	3.37e-05	7.10743e-44	2.71e-43	1	1	-0.743887	0.174652	0.743887	0.918539	44.7471
CG8505	40761	40761	36433	36433	1.03e-54	6.31e-54	77194	14112	16460	16460	12981	12981	1.46e-91	3.07e-91	6.4965e-143	9.38e-142	1	1	0.161944	-0.342563	0.161944	0.504506	24.2994
CG9450	7535	7535	5744	5744	1.42e-54	8.71e-54	13279	4196	3031	3031	3860	3860	1.75e-23	1.05e-23	0.323069	0.0932819	1	0	0.391552	0.348807	0.391552	0.0427448	90.1577
CG6783	6127	6127	4526	4526	2.14e-54	1.31e-53	10653	3405	2030	2030	3132	3132	2.13e-53	2.58e-53	0.000163356	7.9e-05	1	1	0.436944	0.625604	0.436944	0.18866	69.8435
CG1970	16693	16693	13976	13976	2.58e-54	1.57e-53	30669	5485	7718	7718	5046	5046	1.8e-124	5.19e-124	6.1414e-177	1.18e-175	1	1	0.256292	-0.613087	0.256292	0.869379	22.7679
CG32659	1341	1341	654	654	2.7e-54	1.64e-53	1995	659	389	389	607	607	5.09e-12	2.02e-12	0.00072977	0.000325369	1	1	1.03595	0.641926	1.03595	0.39402	72.4455
CG4860	318	318	41	41	3.12e-54	1.9e-53	359	167	38	38	154	154	9.24e-18	4.62e-18	0.0103885	0.00396553	1	1	2.95533	2.01886	2.95533	0.936472	75.9373
CG18104	1503	1503	2474	2474	6.57e-54	3.98e-53	3977	210	821	821	194	194	2.68e-92	5.71e-92	3.80057e-31	9.44e-31	1	1	-0.719	-2.08133	0.719	1.36233	34.5453
CG33719	7659	7659	5863	5863	6.56e-54	3.98e-53	13522	1217	2477	2477	1120	1120	5.66e-116	1.53e-115	1.2582e-165	2.19e-164	1	1	0.385517	-1.1451	0.385517	1.53061	20.1196
CG14191	98	98	445	445	8.57e-54	5.19e-53	543	35	414	414	33	33	5.92e-85	1.14e-84	7.113e-07	4.46e-07	1	1	-2.18295	-3.64909	2.18295	1.46614	59.8218
CG40305	62	62	367	367	8.72e-54	5.27e-53	429	29	180	180	27	27	6.05e-29	4.28e-29	0.714723	0.187552	1	0	-2.56544	-2.73697	2.56544	0.171526	93.733
CG31974	1756	1756	957	957	9.63e-54	5.81e-53	2713	698	505	505	643	643	5.17e-05	1.37e-05	4.40949e-07	2.81e-07	1	1	0.875702	0.348535	0.875702	0.527167	62.4222
CG14648	5705	5705	4175	4175	1.33e-53	8.02e-53	9880	10990	3630	3630	10109	10109	4.940656e-324	4.446591e-323	8.02e-143	1.15e-141	1	1	0.450451	1.4776	0.450451	1.02715	30.4853
CG4550	29184	29184	33022	33022	1.94e-53	1.17e-52	62206	2246	18044	18044	2066	2066	4.940656e-324	4.446591e-323	0	0	1	1	-0.17825	-3.12661	0.17825	2.94836	5.70106
CG10936	2325	2325	1392	1392	2.66e-53	1.6e-52	3717	548	601	601	505	505	0.00426155	0.000972032	3.23849e-23	5.91e-23	1	1	0.740072	-0.251082	0.740072	0.991153	42.7484
CG12529	4961	4961	6612	6612	2.86e-53	1.72e-52	11573	1025	2725	2725	943	943	2.98e-198	1.44e-197	4.57006e-80	3.44e-79	1	1	-0.414456	-1.53093	0.414456	1.11647	27.0722
CG34140	985	985	417	417	2.96e-53	1.77e-52	1402	650	197	197	598	598	9.65e-48	1.04e-47	0.0133678	0.00501084	1	0	1.24008	1.60195	1.24008	0.361874	77.4104
CG15101	2073	2073	1199	1199	3.31e-53	1.98e-52	3272	796	669	669	733	733	0.0924278	0.0182558	1.82954e-12	1.81e-12	1	1	0.789888	0.131807	0.789888	0.658081	54.5514
CG8309	3449	3449	4844	4844	3.89e-53	2.33e-52	8293	3693	2854	2854	3397	3397	6.91e-12	2.73e-12	1.48259e-52	6.95e-52	1	1	-0.490021	0.251276	0.490021	0.741297	39.7965
CG6041	419	419	987	987	4.24e-53	2.53e-52	1406	91	462	462	84	84	3.18e-64	4.62e-64	1.71708e-11	1.58e-11	1	1	-1.2361	-2.45943	1.2361	1.22333	50.2596
CG6240	1297	1297	631	631	7.5e-53	4.47e-52	1928	264	166	166	243	243	0.000164473	4.22e-05	0.00279768	0.00115621	1	1	1.03947	0.549773	1.03947	0.489693	67.9763
CG33676	1227	1227	2106	2106	7.89e-53	4.69e-52	3333	239	670	670	220	220	1.59e-53	1.94e-53	6.9303e-12	6.55e-12	1	1	-0.77937	-1.60666	0.77937	0.827287	48.5088
CG17245	207	207	643	643	1.04e-52	6.18e-52	850	184	393	393	170	170	2.46e-21	1.39e-21	0.0165705	0.00611334	1	0	-1.63519	-1.20899	1.63519	0.426193	79.3249
CG6337	317	317	823	823	2.63e-52	1.56e-51	1140	152	314	314	140	140	2.01e-16	9.55e-17	0.243676	0.0725167	1	0	-1.37641	-1.16534	1.37641	0.211072	86.704
CG9073	1040	1040	1854	1854	2.83e-52	1.68e-51	2894	494	641	641	455	455	2.13e-08	7.05e-09	0.00126066	0.000545808	1	1	-0.834058	-0.494458	0.834058	0.3396	71.0648
CG7445	49967	49967	54884	54884	4.47e-52	2.64e-51	104851	14279	17231	17231	13134	13134	1.53e-122	4.35e-122	7.87924e-42	2.77e-41	1	1	-0.13541	-0.3917	0.13541	0.25629	34.5698
CG8785	1199	1199	2061	2061	5.65e-52	3.33e-51	3260	246	1208	1208	227	227	1e-161	3.86e-161	2.23163e-50	9.91e-50	1	1	-0.781513	-2.41186	0.781513	1.63034	32.403
CG17342	14960	14960	12454	12454	8.83e-52	5.2e-51	27414	10612	8069	8069	9762	9762	7.58e-37	6.53e-37	0.713498	0.18729	1	0	0.264501	0.274787	0.264501	0.0102859	96.2568
CG17707	530	530	1143	1143	9.21e-52	5.42e-51	1673	59	243	243	55	55	2.36e-29	1.69e-29	2.53493e-06	1.5e-06	1	1	-1.10876	-2.14345	1.10876	1.03469	51.7278
CG3513	46	46	320	320	1.22e-51	7.19e-51	366	12	81	81	12	12	9.83e-14	4.2e-14	1	0.246323	1	0	-2.79837	-2.75489	2.79837	0.0434786	98.4701
CG8495	12804	12804	10498	10498	1.35e-51	7.89e-51	23302	12641	7236	7236	11628	11628	2.52e-226	1.39e-225	1.19707e-43	4.52e-43	1	1	0.28648	0.684339	0.28648	0.397859	41.8623
CG4607	3187	3187	2092	2092	1.36e-51	7.95e-51	5279	639	1091	1091	588	588	5.19e-35	4.3e-35	7.34357e-74	5.11e-73	1	1	0.607316	-0.891763	0.607316	1.49908	28.832
CG32505	943	943	397	397	1.48e-51	8.67e-51	1340	755	189	189	695	695	1.19e-68	1.85e-68	1.4737e-05	8.03e-06	1	1	1.24812	1.87863	1.24812	0.630508	66.4378
CG9079	1568	1568	833	833	1.62e-51	9.48e-51	2401	374	321	321	345	345	0.372817	0.0675308	2.99234e-10	2.54e-10	1	1	0.912537	0.104023	0.912537	0.808514	53.0221
CG13369	616	616	1265	1265	1.75e-51	1.02e-50	1881	386	648	648	356	356	2.26e-20	1.24e-20	0.147921	0.0461287	1	0	-1.03814	-0.864117	1.03814	0.174019	85.6439
CG6028	2615	2615	3823	3823	1.96e-51	1.14e-50	6438	698	1207	1207	643	643	9.57e-40	8.78e-40	4.98895e-06	2.85e-06	1	1	-0.547894	-0.908535	0.547894	0.360641	60.3052
CG5697	3439	3439	2300	2300	2.49e-51	1.45e-50	5739	478	349	349	440	440	0.00134017	0.00031911	0.0275117	0.00975831	1	0	0.580355	0.334276	0.580355	0.246079	70.224
CG1019	12251	12251	10004	10004	2.62e-51	1.52e-50	22255	3230	5256	5256	2971	2971	9.63e-142	3.11e-141	4.0664e-191	8.83e-190	1	1	0.292323	-0.823017	0.292323	1.11534	20.7665
CG2028	4190	4190	5685	5685	2.83e-51	1.64e-50	9875	2747	2722	2722	2527	2527	0.00740694	0.00164672	1.78648e-11	1.64e-11	1	1	-0.44021	-0.107241	0.44021	0.332969	56.9351
CG12763	175	175	0	1	3.7e-51	2.14e-50	176	2762	0	1	2541	2541	4.940656e-324	4.446591e-323	0.125336	0.0396192	1	0	7.45121	11.3112	7.45121	3.85997	65.8747
CG10863	6653	6653	5029	5029	3.99e-51	2.31e-50	11682	2409	1844	1844	2216	2216	5.66e-09	1.94e-09	0.00910199	0.00350716	1	1	0.403733	0.265119	0.403733	0.138614	74.4418
CG15707	41	41	305	305	5.16e-51	2.98e-50	346	561	142	142	517	517	6.08e-51	7.03e-51	1.02003e-97	9.21e-97	1	1	-2.89511	1.86427	2.89511	4.75939	37.8224
CG12602	2485	2485	3660	3660	5.24e-51	3.02e-50	6145	830	2720	2720	764	764	5.73e-255	3.69e-254	9.58067e-79	7.02e-78	1	1	-0.558598	-1.83196	0.558598	1.27336	30.4918
CG32751	174	174	0	1	7.35e-51	4.23e-50	175	152	1	1	140	140	1.02e-40	9.51e-41	1	0.246323	1	0	7.44294	7.12928	7.44294	0.31366	95.9562
CG6050	4375	4375	3082	3082	7.41e-51	4.26e-50	7457	2737	1572	1572	2518	2518	7.7e-50	8.65e-50	0.00241045	0.00100532	1	1	0.505416	0.679677	0.505416	0.174261	74.3612
CG6186	64493	64493	69992	69992	7.99e-51	4.59e-50	134485	11682	27506	27506	10746	10746	4.940656e-324	4.446591e-323	0	0	1	1	-0.118047	-1.35595	0.118047	1.2379	8.70591
CG4753	2085	2085	3168	3168	9.61e-51	5.51e-50	5253	1234	1035	1035	1136	1136	0.0318334	0.00666245	2.38055e-23	4.37e-23	1	1	-0.603525	0.134332	0.603525	0.737857	44.9928
CG31523	8596	8596	6742	6742	9.88e-51	5.65e-50	15338	3604	4181	4181	3315	3315	1.5e-23	9.01e-24	3.17625e-63	1.85e-62	1	1	0.350489	-0.334839	0.350489	0.685328	33.837
CG1837	4051	4051	2816	2816	2.05e-50	1.17e-49	6867	1826	1115	1115	1680	1680	9.69e-27	6.44e-27	0.315061	0.091271	1	0	0.524631	0.591418	0.524631	0.0667868	88.7073
CG9114	106	106	445	445	2.28e-50	1.3e-49	551	199	279	279	184	184	1.17e-05	3.27e-06	7.48579e-13	7.67e-13	1	1	-2.06974	-0.600559	2.06974	1.46918	58.4851
CG18013	248	248	699	699	2.37e-50	1.35e-49	947	102	400	400	94	94	5.9e-46	6.15e-46	0.00265932	0.00110331	1	1	-1.49495	-2.08927	1.49495	0.594315	71.5539
CG5494	31535	31535	35389	35389	3.4e-50	1.93e-49	66924	7054	16874	16874	6489	6489	4.940656e-324	4.446591e-323	0	0	1	1	-0.166347	-1.37873	0.166347	1.21239	12.0652
CG11525	12458	12458	10216	10216	3.57e-50	2.03e-49	22674	6546	4665	4665	6022	6022	2.09e-39	1.89e-39	0.0160576	0.00594021	1	0	0.286242	0.368366	0.286242	0.0821236	77.706
CG33950	6203	6203	7975	7975	3.67e-50	2.08e-49	14178	2500	4171	4171	2300	2300	3.15e-121	8.89e-121	6.01869e-29	1.39e-28	1	1	-0.362518	-0.858759	0.362518	0.496241	42.2142
CG11217	1768	1768	991	991	4.91e-50	2.78e-49	2759	1247	550	550	1148	1148	1.48e-48	1.63e-48	0.0164336	0.0060683	1	0	0.835161	1.06162	0.835161	0.226458	78.6686
CG12891	7042	7042	5386	5386	5.35e-50	3.03e-49	12428	2416	3549	3549	2223	2223	1.04e-68	1.62e-68	1.3395e-115	1.45e-114	1	1	0.386771	-0.674905	0.386771	1.06168	26.7025
CG1070	206	206	626	626	5.65e-50	3.19e-49	832	402	302	302	370	370	0.00969821	0.00213245	1.72441e-33	4.66e-33	1	1	-1.60352	0.292977	1.60352	1.8965	45.8146
CG9471	1413	1413	2317	2317	6.1e-50	3.44e-49	3730	457	1078	1078	421	421	1.49e-66	2.24e-66	1.28056e-11	1.19e-11	1	1	-0.713497	-1.35647	0.713497	0.642968	52.5997
CG9577	1370	1370	700	700	8.49e-50	4.78e-49	2070	504	330	330	464	464	2.24e-06	6.57e-07	0.00012826	6.28e-05	1	1	0.968749	0.491659	0.968749	0.47709	67.0025
CG13124	5729	5729	4250	4250	1.05e-49	5.88e-49	9979	1842	2443	2443	1695	1695	2.46e-31	1.86e-31	5.19021e-71	3.43e-70	1	1	0.43082	-0.527369	0.43082	0.958189	31.0164
CG18259	74	74	375	375	1.63e-49	9.15e-49	449	153	278	278	141	141	2.04e-11	7.85e-12	4.71451e-09	3.6e-09	1	1	-2.34129	-0.97939	2.34129	1.3619	63.2236
CG7987	1071	1071	1868	1868	2.13e-49	1.2e-48	2939	1877	1437	1437	1727	1727	2.73e-07	8.54e-08	4.30471e-46	1.74e-45	1	1	-0.802536	0.265208	0.802536	1.06774	42.9099
CG18783	1241	1241	2089	2089	2.71e-49	1.52e-48	3330	515	782	782	474	474	3.15e-18	1.61e-18	0.784298	0.20331	1	0	-0.751309	-0.722282	0.751309	0.0290278	96.2801
CG3127	18114	18114	15414	15414	3.17e-49	1.77e-48	33528	6677	6974	6974	6142	6142	3.92e-13	1.63e-13	1.90925e-44	7.43e-44	1	1	0.232864	-0.183278	0.232864	0.416142	35.8801
CG34040	311	311	794	794	3.26e-49	1.82e-48	1105	37	240	240	35	35	9.25e-39	8.3e-39	3.97651e-08	2.82e-08	1	1	-1.35222	-2.77761	1.35222	1.42538	48.6831
CG10550	3195	3195	2123	2123	3.76e-49	2.09e-48	5318	812	1388	1388	747	747	2.83e-44	2.81e-44	2.54856e-86	2.09e-85	1	1	0.589712	-0.893827	0.589712	1.48354	28.4438
CG8864	2313	2313	1417	1417	4.4e-49	2.45e-48	3730	593	706	706	546	546	6.82e-06	1.93e-06	1.04044e-29	2.47e-29	1	1	0.706926	-0.370767	0.706926	1.07769	39.6121
CG13422	527	527	153	153	5.84e-49	3.25e-48	680	650	1969	1969	598	598	1.39e-169	5.64e-169	2.732e-149	4.24e-148	1	1	1.78427	-1.71925	1.78427	3.50352	33.7432
CG9359	2	2	173	173	6.43e-49	3.57e-48	175	5	106	106	5	5	1.04e-25	6.65e-26	0.1132	0.0360663	1	0	-6.43463	-4.40599	6.43463	2.02864	76.0301
CG12092	1590	1590	2530	2530	7.11e-49	3.94e-48	4120	121	2084	2084	112	112	0	0	8.0683e-215	2.06e-213	1	1	-0.670111	-4.21778	0.670111	3.54767	15.8877
CG13389	9001	9001	7137	7137	8.47e-49	4.69e-48	16138	9124	4448	4448	8393	8393	1.04e-269	7.06e-269	8.56862e-62	4.86e-61	1	1	0.334768	0.91603	0.334768	0.581262	36.5455
CG1180	177	177	3	3	1.27e-48	7.01e-48	180	193	22	22	178	178	1.6e-31	1.21e-31	0.000248431	0.000118145	1	1	5.88264	3.0163	5.88264	2.86634	67.238
CG17903	37415	37415	41532	41532	1.3e-48	7.19e-48	78947	11239	13771	13771	10338	10338	1.28e-108	3.2e-108	7.93902e-35	2.24e-34	1	1	-0.150607	-0.413676	0.150607	0.26307	36.4069
CG7188	3281	3281	2199	2199	1.34e-48	7.36e-48	5480	1226	1068	1068	1128	1128	0.20801	0.0392176	1.24712e-11	1.16e-11	1	1	0.577288	0.0788554	0.577288	0.498433	53.6652
CG10560	1797	1797	1023	1023	1.35e-48	7.45e-48	2820	569	1053	1053	524	524	4.33e-41	4.1e-41	5.85189e-85	4.63e-84	1	1	0.812784	-1.00687	0.812784	1.81965	30.8758
CG8628	1046	1046	1826	1826	1.89e-48	1.04e-47	2872	166	929	929	153	153	4.96e-136	1.55e-135	6.34253e-46	2.54e-45	1	1	-0.803804	-2.60215	0.803804	1.79834	30.89
CG32230	5580	5580	4140	4140	2.02e-48	1.11e-47	9720	2349	2251	2251	2161	2161	0.180271	0.034291	1.3005e-20	2.08e-20	1	1	0.430634	-0.058867	0.430634	0.489501	46.8012
CG9330	1383	1383	2262	2262	2.28e-48	1.25e-47	3645	1524	1346	1346	1402	1402	0.294089	0.0541358	1.73818e-25	3.51e-25	1	1	-0.709798	0.0588079	0.709798	0.768606	48.0111
CG8424	837	837	342	342	2.39e-48	1.31e-47	1179	172	99	99	159	159	0.000225769	5.74e-05	0.00364617	0.0014834	1	1	1.29123	0.683526	1.29123	0.607705	67.9976
CG34313	1949	1949	1141	1141	2.74e-48	1.49e-47	3090	635	532	532	585	585	0.119697	0.0233056	5.10452e-10	4.24e-10	1	1	0.772435	0.13701	0.772435	0.635425	54.8659
CG31743	1949	1949	1141	1141	2.74e-48	1.49e-47	3090	635	532	532	585	585	0.119697	0.0233056	5.10452e-10	4.24e-10	1	1	0.772435	0.13701	0.772435	0.635425	54.8659
CG9914	26429	26429	29893	29893	2.95e-48	1.61e-47	56322	4664	10481	10481	4290	4290	4.940656e-324	4.446591e-323	0	0	1	1	-0.177686	-1.28873	0.177686	1.11104	13.7877
CG2125	1197	1197	586	586	3.12e-48	1.7e-47	1783	357	278	278	329	329	0.0423252	0.00873149	1.6963e-08	1.24e-08	1	1	1.03045	0.243003	1.03045	0.787448	56.6836
CG4535	1335	1335	685	685	4.45e-48	2.42e-47	2020	2714	718	718	2497	2497	2.51e-228	1.4e-227	6.90522e-20	1.06e-19	1	1	0.962664	1.79814	0.962664	0.835476	53.5366
CG5793	1874	1874	1086	1086	5.64e-48	3.06e-47	2960	547	507	507	504	504	0.94985	0.158765	7.05422e-14	7.72e-14	1	1	0.787097	-0.00856201	0.787097	0.795659	49.7295
CG10236	2563	2563	3713	3713	6.33e-48	3.43e-47	6276	2365	1511	1511	2176	2176	5.63e-28	3.87e-28	4.21585e-69	2.7e-68	1	1	-0.534752	0.526175	0.534752	1.06093	33.5125
CG18108	3053	3053	2020	2020	6.78e-48	3.67e-47	5073	1058	1835	1835	974	974	3.87e-60	5.3e-60	1.7103e-105	1.67e-104	1	1	0.595872	-0.913786	0.595872	1.50966	28.3003
CG8004	473	473	1030	1030	1e-47	5.43e-47	1503	386	527	527	356	356	9.56e-09	3.22e-09	1.53602e-05	8.36e-06	1	1	-1.12273	-0.565926	1.12273	0.556807	66.8477
CG33087	2454	2454	1541	1541	1.35e-47	7.29e-47	3995	1192	780	780	1097	1097	2.65e-13	1.12e-13	0.0296649	0.0104571	1	0	0.671268	0.492017	0.671268	0.179251	78.9245
CG8397	1122	1122	537	537	1.35e-47	7.3e-47	1659	636	404	404	585	585	9.51e-09	3.21e-09	1.25148e-05	6.87e-06	1	1	1.06308	0.534081	1.06308	0.528997	66.7731
CG2915	2005	2005	3030	3030	1.59e-47	8.55e-47	5035	1258	1869	1869	1158	1158	1.94e-38	1.72e-38	0.164737	0.0508686	1	0	-0.595716	-0.690631	0.595716	0.0949158	86.2567
CG12119	3816	3816	2654	2654	1.8e-47	9.68e-47	6470	1285	1297	1297	1182	1182	0.0220234	0.00468573	7.90566e-22	1.35e-21	1	1	0.523893	-0.133948	0.523893	0.657841	44.3325
CG10245	401	401	91	91	1.92e-47	1.03e-46	492	166	25	25	153	153	1.25e-23	7.53e-24	0.203934	0.0617451	1	0	2.13966	2.61353	2.13966	0.473868	81.8687
CG17244	744	744	1411	1411	2.03e-47	1.09e-46	2155	182	701	701	168	168	4.65e-78	8.15e-78	3.05365e-17	4.08e-17	1	1	-0.923343	-2.06095	0.923343	1.13761	44.8018
CG8470	1675	1675	940	940	2.5e-47	1.34e-46	2615	1085	490	490	998	998	3.22e-40	2.98e-40	0.0521701	0.0176844	1	0	0.833428	1.02626	0.833428	0.19283	81.2104
CG1865	4872	4872	3548	3548	2.59e-47	1.39e-46	8420	1092	1976	1976	1005	1005	7.06e-72	1.15e-71	5.2389e-115	5.64e-114	1	1	0.457508	-0.975387	0.457508	1.4329	24.2016
CG4716	8047	8047	6318	6318	3.12e-47	1.67e-46	14365	3287	5408	5408	3024	3024	1.71e-150	6.04e-150	1.0333e-191	2.26e-190	1	1	0.348983	-0.838637	0.348983	1.18762	22.7113
CG1318	2094	2094	1262	1262	3.92e-47	2.09e-46	3356	715	556	556	658	658	0.00372883	0.000855032	6.86779e-07	4.31e-07	1	1	0.73055	0.243003	0.73055	0.487547	59.9747
CG4280	1986	1986	3000	3000	5.49e-47	2.92e-46	4986	1548	1244	1244	1424	1424	0.000526993	0.000130025	8.43458e-30	2.01e-29	1	1	-0.595097	0.194963	0.595097	0.79006	42.9624
CG13455	6	6	184	184	7.95e-47	4.23e-46	190	3	57	57	3	3	6.25e-14	2.7e-14	0.451566	0.125684	1	0	-4.9386	-4.24793	4.9386	0.690672	87.7307
CG15442	10525	10525	12715	12715	8.02e-47	4.26e-46	23240	10705	6575	6575	9847	9847	1.16e-144	3.87e-144	3.2082e-183	6.56e-182	1	1	-0.272711	0.582693	0.272711	0.855405	24.174
CG31177	671	671	244	244	9.43e-47	5e-46	915	158	106	106	146	146	0.0138592	0.00300552	4.17176e-06	2.41e-06	1	1	1.45943	0.461904	1.45943	0.997528	59.3999
CG9210	2322	2322	1444	1444	9.71e-47	5.14e-46	3766	761	677	677	700	700	0.553287	0.0973752	4.48317e-12	4.31e-12	1	1	0.685297	0.0481991	0.685297	0.637098	51.8224
CG18854	6704	6704	5146	5146	1.56e-46	8.23e-46	11850	2580	1900	1900	2374	2374	4.41e-13	1.83e-13	0.249695	0.074146	1	0	0.381571	0.321321	0.381571	0.0602502	86.3632
CG6834	612	612	1220	1220	1.74e-46	9.17e-46	1832	356	536	536	328	328	1.48e-12	6.02e-13	0.0217383	0.00786041	1	0	-0.995278	-0.708537	0.995278	0.28674	77.6337
CG1257	1365	1365	2218	2218	2.13e-46	1.13e-45	3583	709	1046	1046	653	653	1.26e-21	7.18e-22	0.83197	0.213414	1	0	-0.700358	-0.679728	0.700358	0.0206305	97.1386
CG1368	2129	2129	3166	3166	2.79e-46	1.47e-45	5295	556	629	629	512	512	0.000588555	0.000144584	0.00389112	0.0015773	1	1	-0.572485	-0.296916	0.572485	0.275569	67.5057
CG3466	1120	1120	544	544	5.04e-46	2.65e-45	1664	312	220	220	287	287	0.00333717	0.000768011	1.29091e-05	7.07e-06	1	1	1.04182	0.383547	1.04182	0.658273	61.2802
CG14820	264	264	699	699	5.16e-46	2.71e-45	963	201	442	442	185	185	3.27e-25	2.07e-25	0.392587	0.11089	1	0	-1.40475	-1.25652	1.40475	0.148233	90.455
CG10242	806	806	332	332	5.49e-46	2.88e-45	1138	297	68	68	274	274	1.93e-30	1.43e-30	0.000651721	0.000292751	1	1	1.2796	2.01057	1.2796	0.730973	63.6435
CG7603	3302	3302	2248	2248	1.27e-45	6.64e-45	5550	1262	1124	1124	1161	1161	0.45139	0.0805552	2.00705e-12	1.98e-12	1	1	0.554698	0.0467259	0.554698	0.507972	52.1985
CG3772	2540	2540	1628	1628	1.45e-45	7.59e-45	4168	844	858	858	777	777	0.0478417	0.0097896	2.23608e-20	3.54e-20	1	1	0.641728	-0.143063	0.641728	0.784791	44.9856
CG4147	17450	17450	20198	20198	1.53e-45	8.02e-45	37648	8660	8818	8818	7966	7966	5.03e-11	1.9e-11	0.0164058	0.00605988	1	0	-0.210985	-0.146596	0.210985	0.0643894	76.6175
CG30148	426	426	944	944	2.1e-45	1.09e-44	1370	64	441	441	59	59	2.5e-73	4.15e-73	7.57712e-19	1.1e-18	1	1	-1.14793	-2.90199	1.14793	1.75406	39.5567
CG15772	520	520	160	160	2.76e-45	1.44e-44	680	77	50	50	71	71	0.0685936	0.0137634	7.81248e-05	3.93e-05	1	1	1.70044	0.505891	1.70044	1.19455	58.7374
CG31373	1975	1975	2964	2964	3.5e-45	1.82e-44	4939	601	1509	1509	553	553	5.84e-102	1.36e-101	3.2486e-26	6.72e-26	1	1	-0.585693	-1.44824	0.585693	0.862549	40.4417
CG17052	4330	4330	3120	3120	9.13e-45	4.75e-44	7450	414	768	768	381	381	1.35e-30	9.98e-31	2.03333e-56	1.02e-55	1	1	0.472821	-1.01132	0.472821	1.48414	24.161
CG14270	284	284	723	723	9.47e-45	4.92e-44	1007	412	409	409	379	379	0.301562	0.0554183	4.92447e-18	6.87e-18	1	1	-1.3481	-0.109903	1.3481	1.2382	52.1247
CG2003	592	592	204	204	1.32e-44	6.86e-44	796	418	128	128	385	385	6.62e-31	4.95e-31	0.795019	0.205437	1	0	1.53703	1.58871	1.53703	0.0516866	96.7466
CG8249	1034	1034	492	492	1.55e-44	8.04e-44	1526	262	157	157	241	241	2.98e-05	8.06e-06	0.00739519	0.00288445	1	1	1.07151	0.618269	1.07151	0.453237	70.2745
CG2045	1526	1526	2400	2400	1.77e-44	9.15e-44	3926	354	1165	1165	326	326	1.21e-110	3.09e-110	1.72716e-33	4.66e-33	1	1	-0.653279	-1.83739	0.653279	1.18411	35.5548
CG17523	108	108	420	420	1.97e-44	1.02e-43	528	65	275	275	60	60	5.02e-34	4.06e-34	0.378594	0.107407	1	0	-1.95936	-2.1964	1.95936	0.237039	89.2078
CG8053	5794	5794	7399	7399	2.01e-44	1.04e-43	13193	3866	3411	3411	3556	3556	0.084484	0.0167756	6.13139e-22	1.05e-21	1	1	-0.352771	0.0600606	0.352771	0.412831	46.0776
CG1532	1199	1199	609	609	2.1e-44	1.08e-43	1808	899	405	405	827	827	8.75e-34	7.04e-34	0.666522	0.176507	1	0	0.977318	1.02997	0.977318	0.0526479	94.8884
CG1315	801	801	1461	1461	2.87e-44	1.47e-43	2262	222	607	607	205	205	6.38e-47	6.75e-47	9.84296e-08	6.7e-08	1	1	-0.867082	-1.56607	0.867082	0.698991	55.3667
CG5520	7565	7565	9377	9377	4.36e-44	2.24e-43	16942	4288	4689	4689	3945	3945	1.23e-15	5.68e-16	0.116842	0.0371255	1	0	-0.309786	-0.249255	0.309786	0.0605314	83.6542
CG30090	352	352	75	75	5.62e-44	2.88e-43	427	96	16	16	89	89	1.87e-13	7.9e-14	0.664936	0.176106	1	0	2.23061	2.47573	2.23061	0.245121	90.0991
CG14893	201	201	583	583	6.4e-44	3.28e-43	784	5	28	28	5	5	6.62e-05	1.75e-05	0.220777	0.0663292	1	0	-1.5363	-2.48543	1.5363	0.949126	61.8123
CG17608	503	503	1045	1045	6.7e-44	3.43e-43	1548	449	407	407	413	413	0.861402	0.145431	3.92231e-17	5.2e-17	1	1	-1.05487	0.021113	1.05487	1.07599	49.5046
CG17560	6403	6403	8073	8073	7.58e-44	3.87e-43	14476	1803	3862	3862	1659	1659	2.05e-198	9.95e-198	2.6595e-76	1.91e-75	1	1	-0.334357	-1.21903	0.334357	0.884677	27.428
CG5431	569	569	193	193	7.84e-44	4e-43	762	154	121	121	142	142	0.217406	0.0408766	1.02226e-09	8.26e-10	1	1	1.55983	0.230884	1.55983	1.32894	53.9962
CG15369	412	412	912	912	7.91e-44	4.03e-43	1324	24	323	323	23	23	6.89e-69	1.07e-68	3.05403e-24	5.83e-24	1	1	-1.14639	-3.81183	1.14639	2.66544	30.0745
CG31666	299	299	51	51	8.2e-44	4.17e-43	350	112	26	26	104	104	3.03e-12	1.21e-12	0.162444	0.0502111	1	0	2.55158	2	2.55158	0.551576	82.2253
CG7337	3399	3399	2350	2350	1.1e-43	5.6e-43	5749	1982	1595	1595	1824	1824	9.59e-05	2.5e-05	7.11423e-08	4.91e-08	1	1	0.53245	0.193549	0.53245	0.3389	61.1063
CG33012	260	260	35	35	1.19e-43	6.06e-43	295	83	38	38	77	77	0.000350998	8.78e-05	2.40777e-06	1.43e-06	1	1	2.89308	1.01886	2.89308	1.87423	60.6859
CG4070	1521	1521	850	850	1.21e-43	6.14e-43	2371	1441	506	506	1326	1326	1.69e-84	3.22e-84	1.50425e-08	1.11e-08	1	1	0.839485	1.38987	0.839485	0.550386	60.4002
CG7642	2647	2647	3753	3753	1.33e-43	6.72e-43	6400	448	1520	1520	413	413	2.45e-148	8.52e-148	8.50992e-61	4.73e-60	1	1	-0.503686	-1.87986	0.503686	1.37617	26.7938
CG9252	48	48	291	291	1.47e-43	7.44e-43	339	1644	342	342	1513	1513	2.66e-175	1.12e-174	3.3143e-129	4.15e-128	1	1	-2.59991	2.14534	2.59991	4.74526	35.3962
CG10559	180	180	8	8	1.77e-43	8.97e-43	188	42	18	18	39	39	0.00750818	0.00166809	1.37723e-07	9.26e-08	1	1	4.49185	1.11548	4.49185	3.37638	57.0885
CG11796	6160	6160	4720	4720	2.04e-43	1.03e-42	10880	1823	2089	2089	1677	1677	2.03e-11	7.82e-12	1.62597e-37	5.03e-37	1	1	0.384143	-0.31693	0.384143	0.701073	35.3979
CG11027	427	427	931	931	2.13e-43	1.07e-42	1358	655	560	560	603	603	0.218092	0.0409916	2.4831e-25	4.99e-25	1	1	-1.12455	0.106731	1.12455	1.23128	47.7347
CG10916	418	418	916	916	3.73e-43	1.88e-42	1334	144	398	398	133	133	1.07e-31	8.19e-32	0.00699111	0.00273327	1	1	-1.13184	-1.58134	1.13184	0.449498	71.5749
CG7291	1966	1966	1195	1195	4.18e-43	2.1e-42	3161	872	491	491	803	803	3.7e-18	1.88e-18	0.945754	0.238882	1	0	0.718253	0.709677	0.718253	0.00857574	98.8201
CG30040	501	501	156	156	4.39e-43	2.2e-42	657	124	57	57	115	115	1.16e-05	3.23e-06	0.0142232	0.00531042	1	0	1.68326	1.0126	1.68326	0.670665	71.5087
CG7668	820	820	354	354	4.53e-43	2.27e-42	1174	710	195	195	654	654	1.23e-58	1.65e-58	0.000322703	0.000151384	1	1	1.21187	1.74582	1.21187	0.533942	69.4159
CG31463	265	265	682	682	5.02e-43	2.51e-42	947	161	492	492	149	149	1.03e-43	1.01e-43	0.0360773	0.0125428	1	0	-1.36378	-1.72335	1.36378	0.359567	79.1356
CG10621	8459	8459	10344	10344	5.03e-43	2.52e-42	18803	850	1938	1938	782	782	3.97e-112	1.03e-111	1.2482e-59	6.73e-59	1	1	-0.290235	-1.30933	0.290235	1.01909	22.1667
CG6470	254	254	34	34	8.6e-43	4.3e-42	288	29	16	16	27	27	0.126289	0.0245195	9.49508e-05	4.73e-05	1	1	2.90122	0.754888	2.90122	2.14633	57.4778
CG12099	2980	2980	4133	4133	1.18e-42	5.88e-42	7113	1919	2274	2274	1766	1766	1.38e-15	6.35e-16	0.0639078	0.0213419	1	0	-0.471877	-0.364747	0.471877	0.10713	81.4976
CG1347	1134	1134	1883	1883	1.18e-42	5.89e-42	3017	888	927	927	817	817	0.009033	0.00199151	4.30881e-10	3.6e-10	1	1	-0.731612	-0.182233	0.731612	0.549379	57.113
CG7289	815	815	1465	1465	1.23e-42	6.14e-42	2280	582	804	804	536	536	2.52e-13	1.06e-13	0.0115064	0.00435568	1	1	-0.846029	-0.584963	0.846029	0.261066	76.4188
CG18067	14246	14246	12028	12028	1.24e-42	6.16e-42	26274	5668	14231	14231	5214	5214	4.940656e-324	4.446591e-323	0	0	1	1	0.24416	-1.44857	0.24416	1.69273	12.6058
CG4169	34234	34234	30747	30747	1.37e-42	6.77e-42	64981	12412	13575	13575	11417	11417	1.95e-42	1.88e-42	5.6126e-79	4.15e-78	1	1	0.154984	-0.249769	0.154984	0.404753	27.6888
CG7224	4161	4161	3005	3005	1.46e-42	7.22e-42	7166	1135	1788	1788	1044	1044	8.44e-45	8.49e-45	6.11748e-82	4.71e-81	1	1	0.469565	-0.776225	0.469565	1.24579	27.3742
CG11400	1120	1120	1864	1864	1.47e-42	7.28e-42	2984	466	921	921	429	429	1.24e-41	1.18e-41	0.000249599	0.000118677	1	1	-0.734903	-1.10222	0.734903	0.36732	66.6746
CG11149	355	355	80	80	2.09e-42	1.03e-41	435	164	44	44	151	151	6.31e-15	2.83e-15	0.234107	0.0699149	1	0	2.14975	1.77897	2.14975	0.370774	85.2898
CG10746	6005	6005	4601	4601	2.22e-42	1.09e-41	10606	3410	2046	2046	3137	3137	3.71e-52	4.41e-52	3.02736e-06	1.78e-06	1	1	0.384217	0.616579	0.384217	0.232363	62.3142
CG3318	1604	1604	2472	2472	2.59e-42	1.28e-41	4076	636	1124	1124	585	585	2.37e-39	2.15e-39	0.00025662	0.000121874	1	1	-0.624005	-0.942134	0.624005	0.318129	66.2331
CG11711	2350	2350	1506	1506	2.64e-42	1.3e-41	3856	692	695	695	637	637	0.118304	0.0230645	9.25127e-17	1.19e-16	1	1	0.641939	-0.12572	0.641939	0.767659	45.5406
CG11765	364	364	85	85	3.56e-42	1.75e-41	449	93	16	16	86	86	9.13e-13	3.73e-13	0.4821	0.132772	1	0	2.0984	2.42626	2.0984	0.327861	86.487
CG31705	6686	6686	5204	5204	4.03e-42	1.98e-41	11890	2135	2860	2860	1964	1964	3.33e-38	2.95e-38	4.05907e-74	2.85e-73	1	1	0.361522	-0.54222	0.361522	0.903743	28.5729
CG10096	746	746	310	310	4.78e-42	2.35e-41	1056	147	163	163	136	136	0.132544	0.0256942	3.65752e-15	4.31e-15	1	1	1.26691	-0.261265	1.26691	1.52817	45.3263
CG15553	298	298	54	54	5.15e-42	2.53e-41	352	70	32	32	65	65	0.00104961	0.000252929	0.000220258	0.000105379	1	1	2.46428	1.02237	2.46428	1.44191	63.0865
CG8012	779	779	1411	1411	5.31e-42	2.6e-41	2190	194	356	356	179	179	1.6e-14	7.03e-15	0.363879	0.103643	1	0	-0.857023	-0.991918	0.857023	0.134895	86.4006
CG8073	2647	2647	1749	1749	5.53e-42	2.7e-41	4396	926	624	624	852	852	3.22e-09	1.11e-09	0.0919433	0.0297807	1	0	0.597828	0.449307	0.597828	0.148521	80.1004
CG8790	3161	3161	2172	2172	6.19e-42	3.02e-41	5333	1190	1216	1216	1095	1095	0.0125361	0.00272978	8.80648e-22	1.5e-21	1	1	0.541357	-0.151212	0.541357	0.692569	43.8727
CG17751	748	748	1368	1368	7.4e-42	3.61e-41	2116	312	1037	1037	287	287	8.08e-100	1.85e-99	8.86986e-18	1.22e-17	1	1	-0.870958	-1.85329	0.870958	0.982335	46.9952
CG31272	816	816	357	357	7.75e-42	3.78e-41	1173	350	207	207	322	322	6.52e-07	1.99e-07	0.000458522	0.000210669	1	1	1.19265	0.63743	1.19265	0.555215	68.2346
CG7800	255	255	36	36	8.23e-42	4e-41	291	146	8	8	135	135	6.77e-31	5.06e-31	0.0282453	0.0100041	1	0	2.82443	4.07682	2.82443	1.25239	69.2803
CG13420	0	1	143	143	1.3e-41	6.32e-41	144	0	68	68	0	1	2.37e-19	1.26e-19	0.543981	0.147655	1	0	-7.15987	-6.08746	7.15987	1.07241	86.9731
CG3962	402	402	881	881	1.43e-41	6.94e-41	1283	232	559	559	214	214	2.34e-36	2e-36	0.0821531	0.0268756	1	0	-1.13195	-1.38524	1.13195	0.253291	81.715
CG32632	1008	1008	490	490	1.66e-41	8.03e-41	1498	599	290	290	551	551	1.59e-19	8.49e-20	0.385609	0.109221	1	0	1.04064	0.925999	1.04064	0.114643	90.0767
CG7443	1975	1975	2917	2917	1.66e-41	8.03e-41	4892	718	1149	1149	661	661	1.08e-30	8.02e-31	0.00444425	0.00178882	1	1	-0.562633	-0.797657	0.562633	0.235024	70.5357
CG12997	2371	2371	1531	1531	1.95e-41	9.44e-41	3902	687	654	654	632	632	0.558163	0.0981703	3.46075e-13	3.63e-13	1	1	0.631021	-0.0493661	0.631021	0.680387	48.1178
CG4557	757	757	320	320	2.12e-41	1.02e-40	1077	487	195	195	448	448	7.39e-24	4.48e-24	0.785895	0.203616	1	0	1.24222	1.20002	1.24222	0.0421968	96.7147
CG1252	350	350	80	80	2.42e-41	1.17e-40	430	120	12	12	111	111	3.03e-21	1.7e-21	0.0195818	0.00712367	1	0	2.12928	3.20945	2.12928	1.08017	66.3441
CG8100	323	323	67	67	2.65e-41	1.28e-40	390	7	14	14	7	7	0.189247	0.0358489	1.76458e-06	1.06e-06	1	1	2.2693	-1	2.2693	3.2693	40.9725
CG8542	7001	7001	5498	5498	3.04e-41	1.46e-40	12499	4795	3317	3317	4411	4411	1.33e-35	1.11e-35	0.140547	0.0440249	1	0	0.348654	0.411227	0.348654	0.0625726	84.7839
CG10827	874	874	1529	1529	4.28e-41	2.06e-40	2403	390	679	679	359	359	1.84e-23	1.11e-23	0.332939	0.0958731	1	0	-0.806883	-0.919428	0.806883	0.112545	87.7593
CG4666	2053	2053	3006	3006	4.35e-41	2.09e-40	5059	581	1415	1415	535	535	2.41e-91	5.04e-91	3.93053e-25	7.84e-25	1	1	-0.550111	-1.40319	0.550111	0.85308	39.2043
CG11212	481	481	151	151	5e-41	2.4e-40	632	241	132	132	222	222	1.99e-06	5.86e-07	1.03652e-05	5.74e-06	1	1	1.67149	0.750022	1.67149	0.921467	64.4627
CG3841	258	258	658	658	5.56e-41	2.66e-40	916	147	392	392	136	136	9.13e-30	6.61e-30	0.327223	0.0944042	1	0	-1.35072	-1.52725	1.35072	0.17653	88.4413
CG2200	676	676	1262	1262	6.7e-41	3.2e-40	1938	321	609	609	296	296	1.09e-25	7.03e-26	0.269863	0.0794737	1	0	-0.900617	-1.04085	0.900617	0.140228	86.5275
CG13656	66	66	319	319	6.9e-41	3.3e-40	385	27	202	202	25	25	1.37e-35	1.15e-35	0.0453495	0.0155181	1	0	-2.27302	-3.01436	2.27302	0.741337	75.4065
CG2767	2194	2194	1395	1395	8.36e-41	3.99e-40	3589	708	446	446	652	652	5.49e-10	1.99e-10	0.305928	0.08894	1	0	0.653298	0.547828	0.653298	0.10547	86.0998
CG32848	1436	1436	806	806	8.66e-41	4.13e-40	2242	361	518	518	333	333	2.42e-10	8.89e-11	1.07551e-35	3.12e-35	1	1	0.833204	-0.63743	0.833204	1.47063	36.1659
CG6355	2836	2836	1917	1917	1.07e-40	5.11e-40	4753	1468	823	823	1351	1351	6.71e-30	4.87e-30	0.0532562	0.0180325	1	0	0.565007	0.715063	0.565007	0.150056	79.015
CG8869	824	824	368	368	1.24e-40	5.88e-40	1192	1398	270	270	1286	1286	1.74e-158	6.53e-158	1.57251e-16	2e-16	1	1	1.16294	2.25186	1.16294	1.08892	51.6435
CG15279	1160	1160	1895	1895	1.27e-40	6.04e-40	3055	435	1348	1348	401	401	1.84e-119	5.07e-119	1.78995e-27	3.89e-27	1	1	-0.708073	-1.74915	0.708073	1.04107	40.4811
CG8493	606	606	227	227	1.38e-40	6.52e-40	833	530	130	130	488	488	1.15e-49	1.29e-49	0.00670518	0.00262902	1	1	1.41663	1.90837	1.41663	0.491744	74.2322
CG8358	310	310	735	735	2.12e-40	1e-39	1045	93	442	442	86	86	1.07e-58	1.44e-58	4.29106e-09	3.28e-09	1	1	-1.24548	-2.36164	1.24548	1.11616	52.7378
CG17839	1271	1271	686	686	2.25e-40	1.07e-39	1957	412	473	473	379	379	0.0014277	0.000339066	8.26588e-24	1.55e-23	1	1	0.889684	-0.319642	0.889684	1.20933	42.3859
CG9527	2752	2752	3825	3825	4.64e-40	2.19e-39	6577	813	1555	1555	748	748	1.28e-64	1.85e-64	1.67429e-15	2.01e-15	1	1	-0.474979	-1.0558	0.474979	0.580825	44.9874
CG3151	4352	4352	3202	3202	4.79e-40	2.26e-39	7554	1567	1593	1593	1442	1442	0.0064642	0.00144534	4.37362e-21	7.14e-21	1	1	0.442705	-0.143675	0.442705	0.58638	43.0193
CG14028	7511	7511	5975	5975	5.71e-40	2.69e-39	13486	2553	2618	2618	2349	2349	0.000142654	3.68e-05	4.27975e-24	8.13e-24	1	1	0.330066	-0.156418	0.330066	0.486485	40.422
CG10365	1340	1340	740	740	6.13e-40	2.89e-39	2080	658	506	506	606	606	0.00297261	0.000687483	5.05514e-08	3.54e-08	1	1	0.856636	0.26018	0.856636	0.596455	58.9527
CG14482	3029	3029	2085	2085	6.36e-40	2.99e-39	5114	1713	1236	1236	1576	1576	1.55e-10	5.73e-11	0.0062185	0.00245076	1	1	0.538794	0.350589	0.538794	0.188205	74.112
CG8062	1330	1330	733	733	7.14e-40	3.35e-39	2063	1018	518	518	937	937	2.58e-28	1.79e-28	0.971486	0.244777	1	0	0.859541	0.855097	0.859541	0.00444419	99.4856
CG14194	458	458	949	949	8.71e-40	4.09e-39	1407	328	408	408	302	302	7.9e-05	2.07e-05	7.8916e-06	4.43e-06	1	1	-1.05106	-0.434021	1.05106	0.61704	63.0094
CG4335	580	580	214	214	8.83e-40	4.14e-39	794	124	109	109	115	115	0.738406	0.126394	2.05384e-09	1.62e-09	1	1	1.43844	0.0773057	1.43844	1.36114	51.3807
CG7021	829	829	376	376	1.13e-39	5.28e-39	1205	485	303	303	447	447	1.63e-07	5.18e-08	4.0078e-05	2.08e-05	1	1	1.14064	0.560957	1.14064	0.579682	66.3038
CG3380	4519	4519	3351	3351	1.16e-39	5.42e-39	7870	1071	1808	1808	986	986	3.48e-55	4.38e-55	1.15874e-90	9.88e-90	1	1	0.431412	-0.874735	0.431412	1.30615	24.8286
CG15902	170	170	9	9	1.17e-39	5.45e-39	179	58	13	13	54	54	4.47e-07	1.38e-07	0.00161856	0.000690533	1	1	4.23947	2.05445	4.23947	2.18502	65.9892
CG7875	9354	9354	11233	11233	3.39e-39	1.58e-38	20587	1722	5599	5599	1584	1584	4.940656e-324	4.446591e-323	2.2547e-282	8.02e-281	1	1	-0.264088	-1.8216	0.264088	1.55751	14.4976
CG4769	23450	23450	20700	20700	3.89e-39	1.81e-38	44150	8200	10119	10119	7543	7543	6.33e-84	1.19e-83	3.8988e-121	4.49e-120	1	1	0.179957	-0.423856	0.179957	0.603814	22.9604
CG7808	9970	9970	11901	11901	5.66e-39	2.63e-38	21871	9819	6229	6229	9032	9032	1.57e-114	4.17e-114	3.2066e-147	4.89e-146	1	1	-0.255417	0.536045	0.255417	0.791462	24.398
CG11797	676	676	278	278	6.33e-39	2.94e-38	954	513	13	13	472	472	2.31e-121	6.52e-121	3.65037e-40	1.22e-39	1	1	1.28194	5.1822	1.28194	3.90026	24.7373
CG1527	1380	1380	777	777	6.52e-39	3.03e-38	2157	1279	424	424	1177	1177	6.65e-82	1.23e-81	5.69356e-10	4.71e-10	1	1	0.828682	1.47298	0.828682	0.644296	56.2589
CG31548	2218	2218	1432	1432	6.87e-39	3.19e-38	3650	901	504	504	829	829	4.74e-19	2.5e-19	0.375435	0.106573	1	0	0.631228	0.717948	0.631228	0.0867205	87.9211
CG18319	2295	2295	3266	3266	7.18e-39	3.32e-38	5561	1482	1622	1622	1364	1364	2.53e-06	7.4e-07	8.83901e-05	4.41e-05	1	1	-0.509031	-0.24993	0.509031	0.2591	66.2687
CG33995	3947	3947	2872	2872	7.94e-39	3.67e-38	6819	1505	1708	1708	1385	1385	6.84e-09	2.33e-09	9.15388e-34	2.49e-33	1	1	0.458701	-0.302422	0.458701	0.761123	37.6039
CG2671	1672	1672	1001	1001	8.47e-39	3.91e-38	2673	1863	570	570	1714	1714	3.37e-132	1.03e-131	3.27197e-21	5.4e-21	1	1	0.740133	1.58833	0.740133	0.8482	46.5981
CG4563	833	833	384	384	1.33e-38	6.13e-38	1217	265	204	204	244	244	0.0652708	0.0131319	1.80768e-07	1.2e-07	1	1	1.11721	0.258312	1.11721	0.858898	56.5359
CG2555	155	155	6	6	1.57e-38	7.22e-38	161	75	0	1	69	69	1.2e-19	6.46e-20	0.678161	0.179164	1	0	4.69116	6.10852	4.69116	1.41736	76.797
CG10539	3015	3015	2090	2090	1.86e-38	8.58e-38	5105	2073	1109	1109	1907	1907	2.86e-48	3.12e-48	0.00020446	9.82e-05	1	1	0.528655	0.782045	0.528655	0.25339	67.599
CG4842	486	486	978	978	2.14e-38	9.84e-38	1464	439	555	555	404	404	1.21e-06	3.63e-07	9.0133e-06	5.02e-06	1	1	-1.00888	-0.458132	1.00888	0.550746	64.6873
CG11814	1145	1145	1852	1852	2.15e-38	9.89e-38	2997	649	1007	1007	597	597	9.78e-25	6.11e-25	0.523641	0.142782	1	0	-0.693736	-0.754261	0.693736	0.0605243	91.9757
CG8663	2902	2902	1997	1997	2.27e-38	1.04e-37	4899	907	1316	1316	835	835	2.67e-25	1.7e-25	1.79279e-56	9.02e-56	1	1	0.539213	-0.656311	0.539213	1.19552	31.0833
CG4772	404	404	116	116	2.52e-38	1.15e-37	520	118	31	31	109	109	2.25e-11	8.67e-12	1	0.246323	1	0	1.80023	1.81399	1.80023	0.0137575	99.2416
CG6090	1525	1525	2326	2326	2.74e-38	1.25e-37	3851	2020	1393	1393	1859	1859	3.14e-16	1.48e-16	1.59976e-49	7e-49	1	1	-0.609042	0.416332	0.609042	1.02537	37.2636
CG7892	518	518	182	182	3.28e-38	1.5e-37	700	487	90	90	448	448	4.1e-58	5.46e-58	0.000101334	5.02e-05	1	1	1.50901	2.3155	1.50901	0.806488	65.17
CG6574	1124	1124	592	592	3.3e-38	1.51e-37	1716	479	245	245	441	441	6.59e-14	2.84e-14	0.569906	0.153741	1	0	0.924973	0.847997	0.924973	0.076976	92.3174
CG1412	1533	1533	899	899	3.97e-38	1.81e-37	2432	885	415	415	815	815	1.67e-30	1.24e-30	0.057869	0.0194683	1	0	0.769965	0.973689	0.769965	0.203724	79.0771
CG18327	973	973	484	484	4.03e-38	1.83e-37	1457	244	187	187	225	225	0.0681948	0.0136867	7.22854e-06	4.07e-06	1	1	1.00743	0.266887	1.00743	0.740546	57.6342
CG5659	1560	1560	2367	2367	4.09e-38	1.86e-37	3927	789	1167	1167	726	726	3.02e-24	1.86e-24	0.316221	0.0915421	1	0	-0.601514	-0.684763	0.601514	0.0832494	87.8426
CG16857	2094	2094	1341	1341	5.64e-38	2.56e-37	3435	805	720	720	741	741	0.600819	0.104886	3.65171e-11	3.3e-11	1	1	0.642952	0.0414766	0.642952	0.601476	51.6665
CG12030	9149	9149	7489	7489	6.45e-38	2.93e-37	16638	1899	2438	2438	1747	1747	1.13e-26	7.49e-27	4.61436e-53	2.18e-52	1	1	0.288841	-0.480819	0.288841	0.769659	27.2878
CG10460	1258	1258	1989	1989	7.03e-38	3.19e-37	3247	390	652	652	359	359	2.28e-20	1.25e-20	0.0690132	0.0229036	1	0	-0.660911	-0.860888	0.660911	0.199977	76.7709
CG16858	8137	8137	6578	6578	8e-38	3.62e-37	14715	3429	2144	2144	3155	3155	4.99e-44	4.95e-44	8.89384e-08	6.07e-08	1	1	0.306848	0.557335	0.306848	0.250487	55.0563
CG3991	4384	4384	3263	3263	1.1e-37	4.99e-37	7647	3088	1093	1093	2841	2841	9.26e-177	3.92e-176	1.55209e-56	7.82e-56	1	1	0.426049	1.37811	0.426049	0.952057	30.9155
CG10105	265	265	647	647	1.42e-37	6.42e-37	912	246	349	349	227	227	4.2e-07	1.3e-07	4.53027e-05	2.34e-05	1	1	-1.28777	-0.620535	1.28777	0.667239	65.8704
CG18628	421	421	128	128	1.89e-37	8.52e-37	549	169	92	92	156	156	5.79e-05	1.54e-05	7.88499e-05	3.96e-05	1	1	1.71768	0.76184	1.71768	0.955836	64.2479
CG7795	57	57	284	284	2.24e-37	1.01e-36	341	140	32	32	129	129	5.24e-15	2.36e-15	1.25908e-43	4.74e-43	1	1	-2.31686	2.01123	2.31686	4.32808	34.8665
CG4786	440	440	904	904	2.77e-37	1.25e-36	1344	279	425	425	257	257	1.3e-10	4.84e-11	0.0294301	0.0103863	1	0	-1.03882	-0.725694	1.03882	0.313125	76.8389
CG8808	1747	1747	1073	1073	3.81e-37	1.71e-36	2820	1146	983	983	1055	1055	0.115758	0.0225841	1.57106e-12	1.57e-12	1	1	0.70323	0.10198	0.70323	0.60125	53.9088
CG33054	578	578	223	223	4.24e-37	1.9e-36	801	207	118	118	191	191	3.89e-05	1.04e-05	0.00106696	0.000466721	1	1	1.37403	0.694786	1.37403	0.67924	66.919
CG11891	180	180	15	15	4.28e-37	1.92e-36	195	58	31	31	54	54	0.0165088	0.00355759	2.18218e-08	1.58e-08	1	1	3.58496	0.800691	3.58496	2.78427	56.2856
CG12091	2978	2978	2075	2075	4.41e-37	1.97e-36	5053	1418	1028	1028	1305	1305	1.06e-08	3.57e-09	0.0159963	0.00591931	1	0	0.521232	0.34421	0.521232	0.177023	74.6478
CG3706	439	439	901	901	4.43e-37	1.98e-36	1340	200	740	740	184	184	1.3e-79	2.32e-79	1.25031e-11	1.16e-11	1	1	-1.03731	-2.00782	1.03731	0.970513	51.6633
CG7496	347	347	89	89	4.8e-37	2.15e-36	436	196	25	25	181	181	2.24e-30	1.65e-30	0.0108205	0.00411507	1	1	1.96306	2.85599	1.96306	0.892931	68.7348
CG9476	327	327	737	737	5.84e-37	2.61e-36	1064	66	233	233	61	61	7.61e-25	4.78e-25	0.00077167	0.00034324	1	1	-1.17237	-1.93345	1.17237	0.761075	60.6364
CG3754	725	725	319	319	5.93e-37	2.65e-36	1044	175	152	152	161	161	0.651204	0.112891	7.57716e-09	5.7e-09	1	1	1.18442	0.0829894	1.18442	1.10144	51.8153
CG7533	1654	1654	1002	1002	6.22e-37	2.77e-36	2656	893	534	534	822	822	5.16e-15	2.32e-15	0.319449	0.0923679	1	0	0.723077	0.622299	0.723077	0.100778	87.7675
CG34339	441	441	141	141	6.33e-37	2.82e-36	582	194	74	74	179	179	3.26e-11	1.24e-11	0.143117	0.0447386	1	0	1.64508	1.27436	1.64508	0.370721	81.6093
CG4692	12171	12171	14233	14233	6.72e-37	2.99e-36	26404	5053	6270	6270	4648	4648	1.8e-54	2.24e-54	4.93623e-10	4.11e-10	1	1	-0.225792	-0.431855	0.225792	0.206063	52.2842
CG4123	6616	6616	5236	5236	7.53e-37	3.34e-36	11852	1605	1803	1803	1477	1477	1.35e-08	4.52e-09	7.5765e-28	1.68e-27	1	1	0.337494	-0.28773	0.337494	0.625224	35.0564
CG1458	1908	1908	1203	1203	7.99e-37	3.55e-36	3111	1094	626	626	1007	1007	3.51e-21	1.97e-21	0.826143	0.212185	1	0	0.665425	0.685829	0.665425	0.0204046	97.0248
CG11785	1548	1548	921	921	9.01e-37	3.99e-36	2469	865	506	506	796	796	8.82e-16	4.08e-16	0.358623	0.102309	1	0	0.749132	0.653631	0.749132	0.0955014	88.6932
CG15609	1603	1603	2403	2403	9.12e-37	4.04e-36	4006	1070	1361	1361	985	985	8.59e-15	3.83e-15	0.124979	0.0395216	1	0	-0.584062	-0.466471	0.584062	0.117591	83.2409
CG9444	271	271	650	650	1.26e-36	5.56e-36	921	61	376	376	57	57	1.05e-58	1.42e-58	1.81778e-11	1.67e-11	1	1	-1.26215	-2.7217	1.26215	1.45955	46.3735
CG3752	25218	25218	22458	22458	1.28e-36	5.66e-36	47676	7658	7614	7614	7044	7044	2.6e-06	7.6e-07	1.21392e-24	2.37e-24	1	1	0.167224	-0.11226	0.167224	0.279484	37.4348
CG9889	2672	2672	1826	1826	1.33e-36	5.85e-36	4498	789	856	856	726	726	0.00117482	0.000281491	1.9145e-20	3.04e-20	1	1	0.549233	-0.237641	0.549233	0.786874	41.107
CG17320	2971	2971	2075	2075	1.4e-36	6.15e-36	5046	900	958	958	828	828	0.00226083	0.000528524	8.3415e-20	1.28e-19	1	1	0.517837	-0.210395	0.517837	0.728232	41.5577
CG4233	14396	14396	12331	12331	1.42e-36	6.24e-36	26727	3976	4145	4145	3658	3658	3.72e-08	1.22e-08	1.90965e-27	4.14e-27	1	1	0.223378	-0.180317	0.223378	0.403695	35.6223
CG18190	4	4	140	140	1.59e-36	6.97e-36	144	636	167	167	585	585	3.56e-55	4.48e-55	1.41731e-70	9.33e-70	1	1	-5.12928	1.80859	5.12928	6.93787	42.5062
CG12199	849	849	406	406	1.84e-36	8.07e-36	1255	570	254	254	525	525	1.46e-22	8.52e-23	0.922414	0.233443	1	0	1.06428	1.04749	1.06428	0.0167959	98.4464
CG31198	21937	21937	24653	24653	2.66e-36	1.17e-35	46590	7155	14695	14695	6582	6582	4.940656e-324	4.446591e-323	0	0	1	1	-0.168397	-1.15873	0.168397	0.99033	14.5329
CG14787	202	202	24	24	3.01e-36	1.32e-35	226	45	6	6	42	42	1.01e-07	3.24e-08	0.798673	0.206208	1	0	3.07325	2.80735	3.07325	0.265894	92.0371
CG15309	1048	1048	549	549	3.26e-36	1.43e-35	1597	443	234	234	408	408	6.45e-12	2.55e-12	0.352387	0.100776	1	0	0.932761	0.802061	0.932761	0.1307	87.7099
CG4609	3175	3175	2251	2251	3.47e-36	1.52e-35	5426	1704	1059	1059	1568	1568	2.72e-23	1.63e-23	0.322049	0.0930209	1	0	0.496191	0.566223	0.496191	0.0700324	87.6317
CG9356	273	273	650	650	3.62e-36	1.58e-35	923	340	279	279	313	313	0.174956	0.0333338	1.71063e-19	2.58e-19	1	1	-1.25154	0.165898	1.25154	1.41744	46.8921
CG1021	2116	2116	1376	1376	3.84e-36	1.67e-35	3492	1003	623	623	923	923	2.38e-14	1.04e-14	0.553178	0.149854	1	0	0.620859	0.567098	0.620859	0.0537607	92.031
CG3192	6596	6596	5233	5233	4.7e-36	2.05e-35	11829	2600	2216	2216	2392	2392	0.00993002	0.00218137	8.66289e-06	4.83e-06	1	1	0.333953	0.11026	0.333953	0.223694	59.8861
CG6584	2638	2638	3629	3629	5.01e-36	2.18e-35	6267	964	1826	1826	887	887	5.6e-74	9.43e-74	4.04871e-17	5.36e-17	1	1	-0.460127	-1.04168	0.460127	0.581553	44.1716
CG9285	4458	4458	5719	5719	6.93e-36	3.01e-35	10177	5057	2486	2486	4652	4652	4.27e-147	1.45e-146	6.4183e-171	1.17e-169	1	1	-0.359366	0.904025	0.359366	1.26339	22.1454
CG10335	870	870	424	424	7.73e-36	3.36e-35	1294	402	117	117	370	370	1.27e-31	9.68e-32	0.000333598	0.000156134	1	1	1.03695	1.66102	1.03695	0.624066	62.4287
CG30410	2334	2334	3268	3268	8.01e-36	3.47e-35	5602	1115	1294	1294	1026	1026	2.87e-08	9.44e-09	0.0381422	0.0131971	1	0	-0.485603	-0.334807	0.485603	0.150797	76.3048
CG15784	3799	3799	4968	4968	8.17e-36	3.54e-35	8767	1198	2524	2524	1102	1102	2e-126	5.85e-126	9.08489e-42	3.19e-41	1	1	-0.387045	-1.19559	0.387045	0.808542	32.3728
CG1112	3824	3824	4996	4996	8.78e-36	3.8e-35	8820	828	2321	2321	762	762	2.2e-181	9.61e-181	6.35827e-78	4.63e-77	1	1	-0.385691	-1.60688	0.385691	1.22119	24.0024
CG14407	1374	1374	2109	2109	9.18e-36	3.97e-35	3483	562	1099	1099	517	517	2.24e-48	2.45e-48	2.69227e-07	1.76e-07	1	1	-0.618177	-1.08796	0.618177	0.469778	56.8201
CG32451	2583	2583	1763	1763	1.23e-35	5.31e-35	4346	1564	1219	1219	1439	1439	2.14e-05	5.85e-06	1.4682e-05	8e-06	1	1	0.551015	0.239368	0.551015	0.311647	63.8738
CG11980	665	665	286	286	1.85e-35	7.98e-35	951	1260	195	195	1159	1159	4.55e-167	1.81e-166	1.62932e-19	2.46e-19	1	1	1.21734	2.57133	1.21734	1.354	47.3427
CG3212	151	151	8	8	2.45e-35	1.05e-34	159	81	16	16	75	75	2.65e-10	9.73e-11	0.00288089	0.0011886	1	1	4.2384	2.22882	4.2384	2.00959	67.8363
CG1838	1039	1039	548	548	2.59e-35	1.12e-34	1587	560	245	245	516	516	4.42e-23	2.62e-23	0.283635	0.0830294	1	0	0.922948	1.07459	0.922948	0.151641	85.8884
CG31606	190	190	21	21	3.08e-35	1.32e-34	211	63	35	35	58	58	0.0220186	0.0046853	4.07453e-08	2.88e-08	1	1	3.17754	0.728698	3.17754	2.44884	56.4757
CG2222	674	674	293	293	3.13e-35	1.34e-34	967	478	256	256	440	440	3.02e-12	1.21e-12	0.00599013	0.00236604	1	1	1.20185	0.78136	1.20185	0.420488	74.0813
CG7532	5010	5010	6328	6328	3.25e-35	1.4e-34	11338	817	2332	2332	752	752	1.94e-186	8.78e-186	1.99202e-92	1.72e-91	1	1	-0.336939	-1.63276	0.336939	1.29582	20.6361
CG33093	203	203	26	26	3.42e-35	1.46e-34	229	52	13	13	48	48	7.67e-06	2.17e-06	0.0561637	0.0189335	1	0	2.9649	1.88452	2.9649	1.08037	73.2929
CG4287	1227	1227	688	688	3.49e-35	1.49e-34	1915	738	359	359	679	679	1.84e-23	1.11e-23	0.493447	0.135497	1	0	0.834655	0.919428	0.834655	0.084773	90.7798
CG17556	609	609	1121	1121	3.47e-35	1.49e-34	1730	312	483	483	287	287	1.61e-12	6.51e-13	0.320707	0.0926878	1	0	-0.880272	-0.750972	0.880272	0.1293	87.1926
CG8770	4350	4350	5582	5582	3.9e-35	1.67e-34	9932	724	1796	1796	666	666	6.41e-119	1.76e-118	1.03179e-53	4.97e-53	1	1	-0.359767	-1.43119	0.359767	1.07143	25.1375
CG7220	3124	3124	2221	2221	3.94e-35	1.68e-34	5345	1258	1245	1245	1158	1158	0.0793452	0.0158029	5.21387e-17	6.83e-17	1	1	0.492185	-0.10451	0.492185	0.596696	45.201
CG4288	1196	1196	1880	1880	3.99e-35	1.7e-34	3076	227	596	596	209	209	7.46e-44	7.37e-44	5.1914e-12	4.97e-12	1	1	-0.652515	-1.51181	0.652515	0.859294	43.1612
CG17186	55	55	269	269	5.36e-35	2.28e-34	324	134	157	157	124	124	0.0560738	0.0113665	2.58398e-13	2.74e-13	1	1	-2.2901	-0.340424	2.2901	1.94968	54.0146
CG11899	3705	3705	2717	2717	5.47e-35	2.33e-34	6422	1686	1039	1039	1551	1551	7.23e-24	4.39e-24	0.0589473	0.0198039	1	0	0.447459	0.578003	0.447459	0.130544	77.4146
CG10803	402	402	125	125	6.47e-35	2.75e-34	527	789	88	88	726	726	1.16e-125	3.38e-125	6.06586e-10	5e-10	1	1	1.68527	3.04439	1.68527	1.35913	55.3564
CG9709	793	793	1363	1363	6.5e-35	2.76e-34	2156	598	934	934	551	551	2.1e-23	1.26e-23	0.861322	0.219749	1	0	-0.781393	-0.76137	0.781393	0.0200226	97.5016
CG9847	3238	3238	2321	2321	7.66e-35	3.25e-34	5559	1369	1087	1087	1260	1260	0.000382574	9.54e-05	0.000192576	9.27e-05	1	1	0.480356	0.213072	0.480356	0.267285	64.2496
CG33717	1119	1119	610	610	8.29e-35	3.51e-34	1729	772	223	223	711	711	5.5e-60	7.49e-60	1.05438e-09	8.51e-10	1	1	0.875329	1.67281	0.875329	0.797477	52.327
CG4580	4	4	134	134	8.55e-35	3.62e-34	138	0	36	36	0	1	5.53e-10	2e-10	1	0.246323	1	0	-5.06609	-5.16993	5.06609	0.103836	97.9915
CG7625	3442	3442	2495	2495	8.68e-35	3.67e-34	5937	1538	1472	1472	1415	1415	0.297303	0.0546845	2.36673e-15	2.81e-15	1	1	0.464207	-0.0569756	0.464207	0.521183	47.109
CG6321	475	475	933	933	1.03e-34	4.35e-34	1408	221	529	529	204	204	4.18e-34	3.39e-34	0.00529782	0.00211161	1	1	-0.97395	-1.3747	0.97395	0.400749	70.8482
CG9511	3106	3106	2211	2211	1.03e-34	4.36e-34	5317	818	707	707	753	753	0.238904	0.044658	3.2126e-06	1.88e-06	1	1	0.490359	0.0909396	0.490359	0.399419	55.1102
CG9155	6746	6746	5393	5393	1.11e-34	4.66e-34	12139	2236	2834	2834	2057	2057	1.01e-28	7.1e-29	1.69223e-57	8.73e-57	1	1	0.322944	-0.462298	0.322944	0.785242	29.1417
CG7300	868	868	429	429	1.13e-34	4.78e-34	1297	375	315	315	345	345	0.258956	0.0481596	3.66103e-10	3.08e-10	1	1	1.01672	0.131245	1.01672	0.885473	53.4498
CG1886	1631	1631	1003	1003	1.23e-34	5.16e-34	2634	883	352	352	813	813	1.72e-42	1.67e-42	3.03232e-06	1.78e-06	1	1	0.701435	1.20768	0.701435	0.506245	58.0812
CG8636	2772	2772	1932	1932	1.39e-34	5.83e-34	4704	2454	1207	1207	2258	2258	2.88e-72	4.73e-72	9.94465e-09	7.41e-09	1	1	0.520832	0.90362	0.520832	0.382788	57.6384
CG17027	1261	1261	718	718	1.46e-34	6.12e-34	1979	326	269	269	300	300	0.208474	0.0392917	2.66747e-06	1.57e-06	1	1	0.812513	0.157356	0.812513	0.655156	55.3608
CG5028	24512	24512	21871	21871	1.46e-34	6.12e-34	46383	7802	8642	8642	7177	7177	2.34e-31	1.78e-31	2.30451e-59	1.23e-58	1	1	0.164469	-0.267984	0.164469	0.432453	27.5528
CG30371	2786	2786	1944	1944	1.47e-34	6.17e-34	4730	437	794	794	402	402	3.73e-30	2.72e-30	1.61276e-55	7.95e-55	1	1	0.519167	-0.981944	0.519167	1.50111	25.6978
CG1242	11537	11537	13476	13476	1.49e-34	6.22e-34	25013	38043	22466	22466	34993	34993	9.881313e-324	8.399116e-323	0	0	1	1	-0.224124	0.639323	0.224124	0.863447	20.6078
CG7067	1121	1121	614	614	1.99e-34	8.33e-34	1735	528	314	314	486	486	1.29e-09	4.57e-10	0.0625598	0.0209231	1	0	0.868476	0.630192	0.868476	0.238284	78.4701
CG33981	2101	2101	1381	1381	2.19e-34	9.15e-34	3482	1078	594	594	992	992	1.23e-23	7.42e-24	0.136142	0.0427652	1	0	0.605363	0.739877	0.605363	0.134514	81.8194
CG8694	2875	2875	2021	2021	2.38e-34	9.93e-34	4896	736	851	851	677	677	9.41e-06	2.65e-06	7.20334e-23	1.3e-22	1	1	0.508493	-0.330003	0.508493	0.838496	37.7503
CG1386	1705	1705	1064	1064	2.52e-34	1.05e-33	2769	376	642	642	346	346	3.19e-21	1.79e-21	5.1095e-47	2.11e-46	1	1	0.680274	-0.891801	0.680274	1.57207	30.2029
CG11093	8	8	147	147	3.18e-34	1.32e-33	155	78	109	109	72	72	0.00728442	0.00162035	7.72429e-15	8.91e-15	1	1	-4.19967	-0.598259	4.19967	3.60141	53.8345
CG34344	1838	1838	1171	1171	3.46e-34	1.44e-33	3009	625	614	614	575	575	0.270442	0.050103	8.34362e-14	9.09e-14	1	1	0.650396	-0.0946767	0.650396	0.745072	46.6077
CG32633	962	962	499	499	3.48e-34	1.45e-33	1461	452	294	294	416	416	5.32e-06	1.52e-06	0.00104892	0.0004594	1	1	0.946997	0.500767	0.946997	0.44623	67.9715
CG6231	2180	2180	1448	1448	4.09e-34	1.69e-33	3628	419	472	472	386	386	0.00368486	0.000845422	1.53432e-15	1.85e-15	1	1	0.590267	-0.290186	0.590267	0.880453	40.1346
CG33459	43	43	239	239	4.06e-34	1.69e-33	282	0	218	218	0	1	5.22e-64	7.53e-64	9.66718e-11	8.52e-11	1	1	-2.4746	-7.76818	2.4746	5.29358	31.8556
CG17633	11500	11500	13422	13422	4.25e-34	1.76e-33	24922	5285	9862	9862	4862	4862	4.940656e-324	4.446591e-323	9.4077e-147	1.42e-145	1	1	-0.222966	-1.02033	0.222966	0.797365	21.8523
CG5345	1934	1934	1249	1249	4.44e-34	1.84e-33	3183	1922	792	792	1768	1768	8.11e-85	1.55e-84	5.82215e-11	5.19e-11	1	1	0.630814	1.15855	0.630814	0.527732	54.4488
CG4405	3245	3245	2337	2337	4.68e-34	1.93e-33	5582	1052	1111	1111	968	968	0.001837	0.000432769	1.75409e-19	2.64e-19	1	1	0.473561	-0.19878	0.473561	0.672341	41.3265
CG17269	273	273	59	59	4.86e-34	2e-33	332	208	64	64	192	192	4.9e-16	2.29e-16	0.0405804	0.0139718	1	0	2.21011	1.58496	2.21011	0.625152	77.9509
CG8759	7153	7153	8683	8683	5.1e-34	2.1e-33	15836	9915	5268	5268	9120	9120	6.64e-229	3.72e-228	3.01e-222	8.21e-221	1	1	-0.279645	0.791778	0.279645	1.07142	20.6981
CG14031	174	174	17	17	5.71e-34	2.35e-33	191	101	7	7	93	93	2.73e-20	1.49e-20	0.658634	0.174625	1	0	3.35548	3.7318	3.35548	0.376323	89.9158
CG34206	395	395	124	124	5.94e-34	2.44e-33	519	16	20	20	15	15	0.49956	0.0885838	6.99909e-05	3.54e-05	1	1	1.67151	-0.415037	1.67151	2.08655	44.478
CG33556	2569	2569	1771	1771	7.13e-34	2.93e-33	4340	743	980	980	684	684	4.15e-13	1.73e-13	2.6746e-36	7.87e-36	1	1	0.536643	-0.518785	0.536643	1.05543	33.7072
CG3534	2810	2810	3795	3795	7.32e-34	3e-33	6605	516	1313	1313	475	475	1.27e-90	2.63e-90	6.30542e-36	1.84e-35	1	1	-0.43353	-1.46687	0.43353	1.03334	29.5548
CG33718	1121	1121	618	618	7.92e-34	3.25e-33	1739	777	225	225	715	715	4.47e-60	6.11e-60	5.48541e-10	4.55e-10	1	1	0.859108	1.66802	0.859108	0.808911	51.5047
CG1092	511	511	194	194	8.79e-34	3.6e-33	705	103	29	29	95	95	2.2e-09	7.71e-10	0.380372	0.107824	1	0	1.39727	1.71187	1.39727	0.314608	81.622
CG12896	296	296	71	71	8.98e-34	3.67e-33	367	24	7	7	23	23	0.00522288	0.00117757	0.632627	0.168531	1	0	2.05971	1.71621	2.05971	0.343499	85.7066
CG17894	4424	4424	3357	3357	1.01e-33	4.13e-33	7781	2811	1937	1937	2586	2586	4.84e-22	2.78e-22	0.733979	0.192091	1	0	0.398179	0.416898	0.398179	0.0187195	95.5098
CG18102	1831	1831	1170	1170	1.1e-33	4.47e-33	3001	931	664	664	857	857	8.25e-07	2.5e-07	0.00259167	0.00107724	1	1	0.646123	0.368112	0.646123	0.278011	69.9166
CG17999	165	165	463	463	1.18e-33	4.81e-33	628	54	702	702	50	50	3.65e-148	1.27e-147	4.38447e-24	8.32e-24	1	1	-1.48855	-3.81147	1.48855	2.32292	39.0544
CG5740	4231	4231	3191	3191	1.35e-33	5.49e-33	7422	1357	1348	1348	1249	1249	0.0544531	0.0110571	4.5473e-15	5.32e-15	1	1	0.40699	-0.110047	0.40699	0.517037	44.0452
CG16762	169	169	469	469	1.49e-33	6.06e-33	638	138	184	184	127	127	0.00145612	0.000345567	1.01599e-05	5.63e-06	1	1	-1.47256	-0.534877	1.47256	0.937687	61.0959
CG16903	780	780	374	374	1.96e-33	7.95e-33	1154	811	210	210	746	746	5.51e-71	8.85e-71	9.40272e-08	6.41e-08	1	1	1.06044	1.82879	1.06044	0.76835	57.9858
CG6199	2639	2639	1835	1835	2.26e-33	9.16e-33	4474	2008	795	795	1847	1847	1.75e-95	3.86e-95	1.93474e-20	3.07e-20	1	1	0.524211	1.21616	0.524211	0.691946	43.1039
CG13873	150	150	436	436	2.59e-33	1.05e-32	586	14	258	258	13	13	2.83e-60	3.88e-60	6.39175e-15	7.4e-15	1	1	-1.53937	-4.31079	1.53937	2.77142	35.7096
CG10039	268	268	623	623	2.66e-33	1.08e-32	891	106	391	391	98	98	1.84e-42	1.79e-42	4.47186e-05	2.31e-05	1	1	-1.217	-1.99631	1.217	0.779316	60.9623
CG1981	1985	1985	2817	2817	2.72e-33	1.1e-32	4802	1114	1363	1363	1025	1025	4.93e-12	1.96e-12	0.204486	0.0619046	1	0	-0.505021	-0.411162	0.505021	0.0938589	84.3276
CG10360	5624	5624	6973	6973	2.73e-33	1.1e-32	12597	3528	4567	4567	3246	3246	1.16e-50	1.34e-50	1.40478e-05	7.67e-06	1	1	-0.310183	-0.492584	0.310183	0.182401	62.9706
CG6530	158	158	449	449	3.01e-33	1.22e-32	607	89	220	220	82	82	9.95e-16	4.59e-16	0.749473	0.195438	1	0	-1.50679	-1.42381	1.50679	0.0829832	94.7802
CG7181	10429	10429	8767	8767	3.73e-33	1.51e-32	19196	3567	2961	2961	3281	3281	5.38e-05	1.43e-05	0.0152643	0.00566894	1	0	0.250446	0.148051	0.250446	0.102395	70.9799
CG8261	2809	2809	1980	1980	3.78e-33	1.53e-32	4789	1536	1181	1181	1413	1413	5.67e-06	1.62e-06	0.000562027	0.000255027	1	1	0.504556	0.258753	0.504556	0.245804	67.2419
CG3714	2044	2044	1347	1347	3.8e-33	1.53e-32	3391	1149	864	864	1057	1057	1.16e-05	3.25e-06	0.000208456	0.000100026	1	1	0.601645	0.290872	0.601645	0.310773	65.9396
CG12789	1450	1450	2170	2170	4.02e-33	1.62e-32	3620	319	886	886	294	294	2.45e-69	3.83e-69	1.23237e-21	2.08e-21	1	1	-0.581642	-1.59149	0.581642	1.00985	36.547
CG7464	585	585	244	244	4.31e-33	1.73e-32	829	329	90	90	303	303	4.62e-28	3.19e-28	0.0193765	0.00705632	1	0	1.26156	1.75132	1.26156	0.489765	72.0345
CG6191	1494	1494	2223	2223	4.56e-33	1.83e-32	3717	886	1517	1517	815	815	1.84e-48	2.02e-48	4.51701e-05	2.33e-05	1	1	-0.573328	-0.896349	0.573328	0.323021	63.9626
CG4144	726	726	1256	1256	6.17e-33	2.47e-32	1982	281	543	543	259	259	5.49e-24	3.35e-24	0.0319896	0.0112058	1	0	-0.790795	-1.068	0.790795	0.277205	74.0445
CG7390	10459	10459	12259	12259	7.16e-33	2.87e-32	22718	891	6194	6194	820	820	4.940656e-324	4.446591e-323	0	0	1	1	-0.229096	-2.91718	0.229096	2.68808	7.85336
CG34346	1755	1755	1117	1117	7.72e-33	3.09e-32	2872	786	537	537	723	723	1.78e-07	5.64e-08	0.0250276	0.00895745	1	0	0.651842	0.429074	0.651842	0.222768	74.5294
CG8392	2844	2844	2014	2014	8.99e-33	3.6e-32	4858	1811	865	865	1666	1666	6.87e-58	9.08e-58	9.94503e-10	8.04e-10	1	1	0.497858	0.945616	0.497858	0.447759	52.649
CG4590	3873	3873	2895	2895	1.23e-32	4.93e-32	6768	2202	1362	1362	2026	2026	3.06e-30	2.24e-30	0.0133717	0.00501155	1	0	0.419888	0.572907	0.419888	0.153019	73.2907
CG9088	1972	1972	1294	1294	1.35e-32	5.39e-32	3266	1914	834	834	1761	1761	1.92e-75	3.27e-75	3.42719e-09	2.65e-09	1	1	0.607822	1.07828	0.607822	0.470454	56.3698
CG1524	7060	7060	8545	8545	1.36e-32	5.41e-32	15605	6733	4676	4676	6194	6194	4.12e-48	4.47e-48	5.90979e-79	4.36e-78	1	1	-0.275412	0.405596	0.275412	0.681009	28.7961
CG1809	1039	1039	1654	1654	1.44e-32	5.73e-32	2693	317	1079	1079	292	292	3.18e-106	7.72e-106	1.28934e-29	3.05e-29	1	1	-0.670764	-1.88565	0.670764	1.21489	35.5719
CG11426	918	918	477	477	1.48e-32	5.9e-32	1395	280	352	352	258	258	0.000161752	4.15e-05	1.40293e-22	2.5e-22	1	1	0.944505	-0.448204	0.944505	1.39271	40.4116
CG15106	1565	1565	2302	2302	1.66e-32	6.61e-32	3867	1031	1051	1051	949	949	0.0238949	0.00506881	3.48362e-07	2.25e-07	1	1	-0.556725	-0.147283	0.556725	0.409442	57.622
CG1469	14787	14787	16899	16899	1.83e-32	7.27e-32	31686	5899	7641	7641	5426	5426	5.77e-84	1.09e-83	2.58553e-23	4.74e-23	1	1	-0.192608	-0.493872	0.192608	0.301264	38.9996
CG15080	2401	2401	1648	1648	2.1e-32	8.32e-32	4049	379	502	502	349	349	1.75e-07	5.55e-08	2.62632e-22	4.6e-22	1	1	0.542919	-0.52446	0.542919	1.06738	33.7154
CG10170	112	112	0	1	2.2e-32	8.7e-32	113	95	0	1	88	88	2.91e-25	1.84e-25	1	0.246323	1	0	6.80735	6.45943	6.80735	0.347923	95.1375
CG9805	4443	4443	5631	5631	2.43e-32	9.6e-32	10074	6258	3699	3699	5757	5757	4.25e-100	9.77e-100	2.7589e-122	3.19e-121	1	1	-0.341857	0.638182	0.341857	0.980039	25.8611
CG10390	82	82	310	310	2.74e-32	1.08e-31	392	43	18	18	40	40	0.00535486	0.001206	7.66554e-13	7.83e-13	1	1	-1.91857	1.152	1.91857	3.07058	38.4549
CG5867	4009	4009	3018	3018	2.75e-32	1.09e-31	7027	879	832	832	809	809	0.587084	0.102685	1.49984e-08	1.1e-08	1	1	0.40965	-0.0404438	0.40965	0.450093	47.6479
CG7997	1198	1198	1849	1849	3.06e-32	1.21e-31	3047	591	569	569	544	544	0.471917	0.0839268	3.6566e-08	2.6e-08	1	1	-0.626117	-0.064822	0.626117	0.561295	52.7295
CG31369	104	104	350	350	3.48e-32	1.37e-31	454	36	185	185	34	34	2.47e-26	1.62e-26	0.0320575	0.011227	1	0	-1.75077	-2.44392	1.75077	0.693147	71.6379
CG10877	659	659	298	298	4.9e-32	1.93e-31	957	389	139	139	358	358	2.63e-23	1.57e-23	0.227904	0.0682867	1	0	1.14497	1.36487	1.14497	0.219909	83.888
CG3249	1865	1865	1213	1213	5.06e-32	1.99e-31	3078	2454	790	790	2258	2258	4.06e-162	1.57e-161	1.7171e-29	4.04e-29	1	1	0.620596	1.51512	0.620596	0.894525	40.9602
CG4164	990	990	1586	1586	5.2e-32	2.04e-31	2576	527	780	780	485	485	1.01e-16	4.86e-17	0.97185	0.244818	1	0	-0.679892	-0.685489	0.679892	0.00559704	99.1835
CG14989	1643	1643	1036	1036	6.38e-32	2.51e-31	2679	469	629	629	432	432	1.6e-09	5.63e-10	3.67942e-30	8.86e-30	1	1	0.665308	-0.542029	0.665308	1.20734	35.5277
CG16982	1819	1819	1177	1177	6.58e-32	2.58e-31	2996	1311	502	502	1206	1206	8.55e-67	1.29e-66	7.74926e-12	7.3e-12	1	1	0.628031	1.26447	0.628031	0.636439	49.6675
CG1582	872	872	448	448	7.45e-32	2.92e-31	1320	844	305	305	777	777	4.99e-48	5.41e-48	0.00264561	0.0010978	1	1	0.960829	1.34911	0.960829	0.388276	71.2197
CG12837	304	304	80	80	7.57e-32	2.96e-31	384	108	40	40	100	100	4.14e-07	1.28e-07	0.0775651	0.0254799	1	0	1.926	1.32193	1.926	0.604071	76.1243
CG7720	1771	1771	1139	1139	7.63e-32	2.98e-31	2910	508	505	505	468	468	0.248443	0.0463041	4.76369e-12	4.57e-12	1	1	0.636796	-0.109775	0.636796	0.746571	46.0323
CG6612	982	982	1574	1574	7.72e-32	3.02e-31	2556	472	551	551	435	435	0.000246175	6.24e-05	0.00219712	0.000921198	1	1	-0.680641	-0.341037	0.680641	0.339604	66.7135
CG9057	5872	5872	4667	4667	7.87e-32	3.07e-31	10539	5154	3178	3178	4741	4741	2.05e-69	3.22e-69	1.68595e-08	1.23e-08	1	1	0.331357	0.577072	0.331357	0.245716	57.4203
CG8198	775	775	1309	1309	7.92e-32	3.09e-31	2084	379	475	475	349	349	1.29e-05	3.58e-06	0.0112095	0.00424853	1	1	-0.756197	-0.4447	0.756197	0.311496	70.8253
CG5725	3551	3551	2629	2629	8.2e-32	3.2e-31	6180	1170	1010	1010	1077	1077	0.14852	0.0285755	3.4397e-06	2.01e-06	1	1	0.433711	0.092663	0.433711	0.341048	55.9801
CG12841	179	179	22	22	8.95e-32	3.48e-31	201	22	5	5	21	21	0.00249392	0.000580781	0.20863	0.0630036	1	0	3.02438	2.07039	3.02438	0.953995	76.0205
CG11034	101	101	342	342	1.08e-31	4.2e-31	443	71	283	283	66	66	3.91e-33	3.09e-33	0.189312	0.0576809	1	0	-1.75964	-2.10026	1.75964	0.340623	83.7819
CG11384	110	110	358	358	1.11e-31	4.33e-31	468	30	64	64	28	28	0.000222501	5.66e-05	0.185245	0.0565609	1	0	-1.70246	-1.19265	1.70246	0.509811	76.9553
CG15793	494	494	934	934	1.12e-31	4.33e-31	1428	383	326	326	353	353	0.318382	0.0583007	4.69017e-14	5.18e-14	1	1	-0.918912	0.114796	0.918912	1.03371	47.0605
CG10178	1986	1986	1315	1315	1.25e-31	4.84e-31	3301	402	404	404	370	370	0.235539	0.044064	5.5159e-10	4.57e-10	1	1	0.594803	-0.12683	0.594803	0.721633	45.1828
CG5735	573	573	243	243	1.57e-31	6.1e-31	816	187	138	138	173	173	0.0536848	0.0109091	6.04692e-06	3.43e-06	1	1	1.23758	0.326104	1.23758	0.911475	57.5871
CG2096	1762	1762	1135	1135	1.69e-31	6.52e-31	2897	810	549	549	746	746	4.85e-08	1.58e-08	0.0519889	0.0176278	1	0	0.634522	0.442369	0.634522	0.192152	76.756
CG16836	89	89	319	319	1.76e-31	6.8e-31	408	105	262	262	97	97	1.18e-18	6.12e-19	0.108588	0.0347321	1	0	-1.84168	-1.43351	1.84168	0.408169	81.8579
CG14277	700	700	329	329	1.95e-31	7.53e-31	1029	274	129	129	253	253	2.18e-10	8.01e-11	0.522941	0.142639	1	0	1.08927	0.971766	1.08927	0.117501	90.2632
CG3861	78795	78795	74232	74232	1.97e-31	7.62e-31	153027	26693	28746	28746	24553	24553	9.41e-74	1.58e-73	3.0275e-103	2.88e-102	1	1	0.0860628	-0.227462	0.0860628	0.313525	21.5379
CG31446	562	562	1024	1024	2.06e-31	7.94e-31	1586	222	459	459	205	205	2.72e-23	1.62e-23	0.0405352	0.0139582	1	0	-0.865574	-1.16287	0.865574	0.297297	74.4342
CG14168	3226	3226	2356	2356	2.17e-31	8.36e-31	5582	968	725	725	891	891	3.99e-05	1.07e-05	0.0595624	0.0199942	1	0	0.453407	0.297444	0.453407	0.155962	74.4059
CG31063	1480	1480	912	912	2.34e-31	9.02e-31	2392	748	450	450	689	689	1.47e-12	5.96e-13	0.437545	0.122308	1	0	0.698491	0.614579	0.698491	0.0839125	89.275
CG31919	3749	3749	2809	2809	3.46e-31	1.33e-30	6558	1426	1644	1644	1312	1312	1.1e-09	3.9e-10	7.92839e-31	1.95e-30	1	1	0.416449	-0.325443	0.416449	0.741892	35.9522
CG7590	5552	5552	6844	6844	3.85e-31	1.48e-30	12396	2135	2974	2974	1964	1964	4.53e-47	4.81e-47	1.82836e-09	1.45e-09	1	1	-0.301832	-0.59861	0.301832	0.296778	50.4222
CG8405	1182	1182	683	683	4.05e-31	1.55e-30	1865	726	350	350	668	668	1.27e-23	7.69e-24	0.238743	0.0711694	1	0	0.791273	0.932493	0.791273	0.141221	84.8556
CG5330	2173	2173	3007	3007	4.17e-31	1.6e-30	5180	6788	3013	3013	6244	6244	2.63e-252	1.67e-251	9.6276e-195	2.13e-193	1	1	-0.468637	1.05127	0.468637	1.51991	23.5668
CG3299	2812	2812	2008	2008	4.47e-31	1.71e-30	4820	1377	1023	1023	1267	1267	3.72e-07	1.16e-07	0.0170125	0.00626418	1	0	0.485837	0.30861	0.485837	0.177227	73.2715
CG11265	2755	2755	1960	1960	4.6e-31	1.76e-30	4715	1392	760	760	1281	1281	5.62e-31	4.21e-31	0.000889559	0.000392265	1	1	0.491199	0.753199	0.491199	0.262	65.215
CG9214	1241	1241	1888	1888	4.63e-31	1.77e-30	3129	478	925	925	440	440	4.93e-40	4.56e-40	2.24719e-06	1.34e-06	1	1	-0.605356	-1.07195	0.605356	0.466594	56.4724
CG14935	2084	2084	1401	1401	4.64e-31	1.77e-30	3485	770	1053	1053	709	709	2.46e-16	1.17e-16	4.99453e-41	1.72e-40	1	1	0.572898	-0.570648	0.572898	1.14355	33.377
CG31956	1172	1172	676	676	4.92e-31	1.87e-30	1848	592	308	308	545	545	4.2e-16	1.97e-16	0.829798	0.212984	1	0	0.793877	0.823326	0.793877	0.0294485	96.4232
CG3136	411	411	143	143	5.07e-31	1.93e-30	554	284	107	107	262	262	3.97e-16	1.87e-16	0.290805	0.0848853	1	0	1.52312	1.29196	1.52312	0.231167	86.8228
CG8479	2370	2370	1638	1638	5.28e-31	2.01e-30	4008	1555	959	959	1431	1431	4.22e-22	2.43e-22	0.562741	0.152058	1	0	0.532952	0.577421	0.532952	0.0444693	92.2986
CG1373	13	13	151	151	5.72e-31	2.17e-30	164	86	125	125	80	80	0.00204362	0.000479863	1.55399e-12	1.55e-12	1	1	-3.53797	-0.643856	3.53797	2.89411	55.005
CG9774	1334	1334	802	802	7.44e-31	2.82e-30	2136	901	344	344	829	829	1.15e-46	1.21e-46	1.79223e-06	1.08e-06	1	1	0.734085	1.26896	0.734085	0.534879	57.8491
CG15261	2753	2753	3678	3678	8.11e-31	3.08e-30	6431	738	1041	1041	679	679	2.4e-18	1.23e-18	0.0133479	0.00500493	1	0	-0.417917	-0.616487	0.417917	0.19857	67.7901
CG8957	358	358	737	737	8.21e-31	3.11e-30	1095	190	212	212	175	175	0.0671139	0.0134813	1.52999e-05	8.33e-06	1	1	-1.04171	-0.276709	1.04171	0.764996	57.6579
CG1909	496	496	929	929	8.9e-31	3.37e-30	1425	171	454	454	158	158	4.19e-34	3.4e-34	6.59438e-05	3.35e-05	1	1	-0.905338	-1.52277	0.905338	0.617429	59.4535
CG34166	11183	11183	9524	9524	9.53e-31	3.6e-30	20707	1101	1052	1052	1013	1013	0.403034	0.0725561	1.84858e-05	9.98e-06	1	1	0.231668	-0.0545005	0.231668	0.286168	44.7377
CG12218	1657	1657	1058	1058	1e-30	3.8e-30	2715	2357	801	801	2168	2168	5.67e-144	1.88e-143	7.00338e-22	1.2e-21	1	1	0.647234	1.43649	0.647234	0.789257	45.0566
CG33274	377	377	124	124	1.06e-30	4.01e-30	501	267	103	103	246	246	1.25e-14	5.53e-15	0.134423	0.0422683	1	0	1.60422	1.25601	1.60422	0.34821	82.1653
CG5151	753	753	370	370	1.13e-30	4.28e-30	1123	465	178	178	428	428	1.01e-24	6.31e-25	0.129748	0.0408823	1	0	1.02512	1.26573	1.02512	0.240609	80.9906
CG1208	2436	2436	3306	3306	1.48e-30	5.59e-30	5742	574	874	874	528	528	2.03e-20	1.11e-20	0.00121325	0.000526585	1	1	-0.440573	-0.727095	0.440573	0.286523	60.5935
CG12262	9090	9090	10705	10705	1.7e-30	6.41e-30	19795	2855	6105	6105	2627	2627	1.558126e-311	1.230566e-310	1.2097e-141	1.7e-140	1	1	-0.235933	-1.21658	0.235933	0.980642	19.3932
CG9258	7691	7691	6332	6332	1.73e-30	6.5e-30	14023	3252	3461	3461	2992	2992	5.6e-09	1.91e-09	1.80556e-29	4.24e-29	1	1	0.28051	-0.210079	0.28051	0.490589	36.378
CG5047	299	299	649	649	1.9e-30	7.12e-30	948	223	324	324	206	206	3.35e-07	1.04e-07	0.00505827	0.00202303	1	1	-1.11807	-0.653349	1.11807	0.464724	70.6391
CG6822	1791	1791	1169	1169	2.18e-30	8.2e-30	2960	1032	618	618	950	950	4.86e-17	2.36e-17	0.974514	0.245464	1	0	0.61549	0.620321	0.61549	0.00483027	99.2213
CG7381	1264	1264	1908	1908	2.19e-30	8.21e-30	3172	84	838	838	78	78	1.28e-161	4.91e-161	1.94536e-83	1.52e-82	1	1	-0.594065	-3.4254	0.594065	2.83134	17.3429
CG14855	133	133	8	8	2.41e-30	9.05e-30	141	39	2	2	36	36	5.4e-09	1.85e-09	1	0.246323	1	0	4.05528	4.16993	4.05528	0.114643	97.2507
CG11162	200	200	33	33	2.45e-30	9.17e-30	233	69	13	13	64	64	3.02e-09	1.05e-09	0.580834	0.156338	1	0	2.59946	2.29956	2.59946	0.299902	89.6563
CG17928	1590	1590	1009	1009	3.15e-30	1.18e-29	2599	237	339	339	218	218	3.33e-07	1.04e-07	2.56867e-21	4.27e-21	1	1	0.656101	-0.636957	0.656101	1.29306	33.6607
CG17207	4	4	118	118	3.42e-30	1.28e-29	122	0	32	32	0	1	7.92e-09	2.68e-09	1	0.246323	1	0	-4.88264	-5	4.88264	0.117357	97.6529
CG3214	5054	5054	3970	3970	3.55e-30	1.32e-29	9024	2120	1936	1936	1950	1950	0.83481	0.141494	1.15138e-09	9.25e-10	1	1	0.348287	0.0103952	0.348287	0.337891	50.7575
CG12171	2466	2466	1729	1729	4.54e-30	1.7e-29	4195	819	701	701	754	754	0.172786	0.0329434	4.02376e-06	2.33e-06	1	1	0.512235	0.10515	0.512235	0.407085	55.7189
CG6680	1120	1120	1726	1726	5.04e-30	1.88e-29	2846	337	687	687	310	310	1.81e-33	1.44e-33	3.32811e-06	1.94e-06	1	1	-0.623934	-1.14804	0.623934	0.524108	54.3476
CG10181	1249	1249	1885	1885	5.14e-30	1.91e-29	3134	239	1080	1080	220	220	1.68e-136	5.26e-136	7.09164e-53	3.34e-52	1	1	-0.593791	-2.29546	0.593791	1.70166	25.8681
CG12340	621	621	1089	1089	6.26e-30	2.33e-29	1710	892	542	542	821	821	4.15e-14	1.8e-14	5.61035e-40	1.87e-39	1	1	-0.810339	0.599089	0.810339	1.40943	36.5056
CG31810	144	144	12	12	6.7e-30	2.49e-29	156	75	2	2	69	69	2.17e-18	1.11e-18	0.235148	0.0701916	1	0	3.58496	5.10852	3.58496	1.52356	70.1761
CG4600	8566	8566	10117	10117	7.73e-30	2.87e-29	18683	2297	3522	3522	2113	2113	2.61e-79	4.66e-79	1.07489e-28	2.46e-28	1	1	-0.240088	-0.737102	0.240088	0.497014	32.5719
CG18557	34	34	200	200	8.48e-30	3.14e-29	234	3	63	63	3	3	1.3e-15	5.98e-16	0.0327503	0.0114494	1	0	-2.55639	-4.39232	2.55639	1.83592	58.2015
CG6738	131	131	8	8	8.6e-30	3.19e-29	139	37	2	2	35	35	1.02e-08	3.45e-09	1	0.246323	1	0	4.03342	4.12928	4.03342	0.09586	97.6785
CG5502	25706	25706	23199	23199	8.86e-30	3.28e-29	48905	24560	12869	12869	22591	22591	4.940656e-324	4.446591e-323	3.154e-230	9e-229	1	1	0.148043	0.811848	0.148043	0.663806	18.2352
CG31758	1564	1564	2264	2264	9.4e-30	3.48e-29	3828	604	972	972	556	556	1.22e-26	8.08e-27	0.00268337	0.00111159	1	1	-0.533633	-0.805871	0.533633	0.272238	66.2182
CG1681	4318	4318	3328	3328	9.74e-30	3.6e-29	7646	1019	1264	1264	938	938	3.97e-12	1.58e-12	1.72241e-30	4.19e-30	1	1	0.375708	-0.430337	0.375708	0.806044	31.7924
CG11076	1091	1091	624	624	1.01e-29	3.72e-29	1715	1420	305	305	1307	1307	1.41e-147	4.84e-147	1.57823e-29	3.72e-29	1	1	0.806033	2.09938	0.806033	1.29334	38.3939
CG12582	1422	1422	881	881	1.24e-29	4.59e-29	2303	899	450	450	827	827	2.99e-26	1.95e-26	0.0769511	0.0252917	1	0	0.690708	0.877962	0.690708	0.187255	78.6717
CG7542	2626	2626	1869	1869	1.27e-29	4.69e-29	4495	829	787	787	763	763	0.559099	0.0983138	3.67156e-10	3.09e-10	1	1	0.4906	-0.0446806	0.4906	0.535281	47.8223
CG16944	159389	159389	153075	153075	1.4e-29	5.17e-29	312464	61219	61120	61120	56310	56310	9.46e-45	9.51e-45	2.02876e-71	1.36e-70	1	1	0.0583134	-0.118253	0.0583134	0.176567	24.8269
CG1840	146	146	407	407	1.71e-29	6.31e-29	553	84	208	208	78	78	8.14e-15	3.64e-15	0.805185	0.207519	1	0	-1.47906	-1.41504	1.47906	0.0640229	95.851
CG34198	531	531	964	964	2.25e-29	8.28e-29	1495	124	564	564	115	115	5.61e-72	9.19e-72	1.67209e-19	2.52e-19	1	1	-0.860321	-2.29406	0.860321	1.43374	37.5021
CG15528	4	4	115	115	2.47e-29	9.08e-29	119	4	60	60	4	4	7.36e-14	3.16e-14	0.453244	0.126108	1	0	-4.84549	-3.90689	4.84549	0.938599	83.7727
CG3479	1073	1073	1659	1659	2.73e-29	1e-28	2732	786	948	948	723	723	4.07e-08	1.33e-08	0.00956357	0.0036729	1	1	-0.628664	-0.390891	0.628664	0.237772	72.5574
CG4839	766	766	387	387	2.74e-29	1.01e-28	1153	323	213	213	298	298	0.000196262	5.01e-05	0.00160774	0.000686396	1	1	0.985011	0.484459	0.985011	0.500552	66.3056
CG18549	1529	1529	969	969	2.85e-29	1.04e-28	2498	705	449	449	649	649	1.73e-09	6.07e-10	0.236087	0.0704461	1	0	0.65802	0.531503	0.65802	0.126517	83.8737
CG13401	311	311	91	91	3.09e-29	1.13e-28	402	340	82	82	313	313	6.86e-33	5.39e-33	0.547997	0.148565	1	0	1.77298	1.93247	1.77298	0.159491	91.7468
CG9331	15400	15400	13492	13492	3.14e-29	1.15e-28	28892	2411	4154	4154	2218	2218	7.63e-132	2.31e-131	2.3197e-159	3.93e-158	1	1	0.190826	-0.905242	0.190826	1.09607	14.8284
CG7675	584	584	261	261	3.34e-29	1.22e-28	845	344	103	103	317	317	1.99e-26	1.31e-26	0.0209219	0.00758421	1	0	1.16192	1.62184	1.16192	0.45992	71.6421
CG1744	6846	6846	8223	8223	3.37e-29	1.23e-28	15069	2079	3964	3964	1913	1913	7.67e-161	2.91e-160	9.45284e-66	5.77e-65	1	1	-0.264404	-1.05112	0.264404	0.786717	25.1545
CG33976	200	200	491	491	3.9e-29	1.42e-28	691	53	223	223	49	49	1.09e-27	7.4e-28	0.00042891	0.000197768	1	1	-1.29572	-2.18619	1.29572	0.890467	59.2685
CG6145	2834	2834	3742	3742	3.97e-29	1.44e-28	6576	884	1513	1513	814	814	3.7e-48	4.02e-48	6.31316e-12	6e-12	1	1	-0.40097	-0.894311	0.40097	0.493341	44.8356
CG6398	979	979	544	544	4.18e-29	1.52e-28	1523	674	275	275	620	620	2.37e-31	1.8e-31	0.0127144	0.0047842	1	1	0.847702	1.17284	0.847702	0.325134	72.2779
CG6544	1206	1206	717	717	4.62e-29	1.68e-28	1923	350	304	304	322	322	0.496879	0.0881371	7.8182e-07	4.88e-07	1	1	0.750185	0.0829894	0.750185	0.667196	52.9276
CG4019	6604	6604	5381	5381	5.6e-29	2.03e-28	11985	1401	2167	2167	1289	1289	7.38e-51	8.5e-51	2.06778e-76	1.49e-75	1	1	0.295466	-0.749447	0.295466	1.04491	22.0435
CG2986	366	366	734	734	5.62e-29	2.04e-28	1100	1341	859	859	1234	1234	2.47e-16	1.17e-16	8.85121e-44	3.36e-43	1	1	-1.00394	0.522612	1.00394	1.52655	39.6737
CG6598	3478	3478	4473	4473	6.26e-29	2.27e-28	7951	2506	1873	1873	2306	2306	2.26e-11	8.68e-12	5.02154e-33	1.34e-32	1	1	-0.362985	0.300042	0.362985	0.663026	35.3782
CG6812	787	787	1293	1293	9.17e-29	3.32e-28	2080	390	683	683	359	359	6.22e-24	3.79e-24	0.0701036	0.023234	1	0	-0.716287	-0.927902	0.716287	0.211615	77.1942
CG11334	1327	1327	814	814	1.02e-28	3.68e-28	2141	718	334	334	661	661	1.8e-25	1.15e-25	0.016865	0.00621455	1	0	0.705068	0.984802	0.705068	0.279734	71.5949
CG40080	86	86	299	299	1.12e-28	4.04e-28	385	242	228	228	223	223	0.850627	0.143805	2.9292e-16	3.66e-16	1	1	-1.79774	-0.0319901	1.79774	1.76575	50.4489
CG9940	1132	1132	663	663	1.12e-28	4.06e-28	1795	986	411	411	907	907	2.45e-43	2.41e-43	0.000899268	0.000396191	1	1	0.771793	1.14196	0.771793	0.370171	67.5847
CG16705	4414	4414	5521	5521	1.15e-28	4.16e-28	9935	852	2344	2344	784	784	8.75e-179	3.76e-178	1.59848e-86	1.32e-85	1	1	-0.322843	-1.58005	0.322843	1.2572	20.4325
CG1954	1724	1724	1132	1132	1.27e-28	4.59e-28	2856	987	651	651	908	908	8.14e-11	3.05e-11	0.17775	0.0545099	1	0	0.606886	0.480035	0.606886	0.126851	82.7116
CG9621	1299	1299	1928	1928	1.4e-28	5.04e-28	3227	398	943	943	367	367	9.62e-59	1.3e-58	4.77647e-15	5.58e-15	1	1	-0.569704	-1.36148	0.569704	0.791774	41.8445
CG15173	854	854	455	455	1.44e-28	5.19e-28	1309	272	276	276	251	251	0.295805	0.0544335	4.35795e-12	4.2e-12	1	1	0.90837	-0.136981	0.90837	1.04535	46.4944
CG7441	902	902	491	491	1.83e-28	6.56e-28	1393	415	237	237	382	382	6.11e-09	2.09e-09	0.191694	0.058327	1	0	0.877404	0.688686	0.877404	0.188719	82.2986
CG3618	608	608	281	281	1.93e-28	6.92e-28	889	477	149	149	439	439	3.97e-34	3.22e-34	0.0100328	0.0038369	1	1	1.1135	1.55891	1.1135	0.445407	71.4283
CG10913	738	738	372	372	2.02e-28	7.24e-28	1110	290	281	281	267	267	0.578707	0.10136	4.68681e-12	4.5e-12	1	1	0.988318	-0.0737304	0.988318	1.06205	48.202
CG4739	262	262	67	67	2.19e-28	7.86e-28	329	45	39	39	42	42	0.824313	0.139932	1.63793e-06	9.9e-07	1	1	1.96733	0.106915	1.96733	1.86042	51.3966
CG9078	1663	1663	1085	1085	2.25e-28	8.05e-28	2748	1255	619	619	1155	1155	1.62e-37	1.41e-37	0.00186747	0.000791499	1	1	0.616093	0.899882	0.616093	0.283788	68.4638
CG5910	761	761	389	389	2.51e-28	8.96e-28	1150	177	104	104	163	163	0.000367178	9.17e-05	0.117055	0.0371833	1	0	0.968126	0.648288	0.968126	0.319838	75.1672
CG31688	306	306	643	643	2.88e-28	1.03e-27	949	184	423	423	170	170	7.47e-26	4.82e-26	0.141214	0.0441999	1	0	-1.07129	-1.31512	1.07129	0.243836	81.4591
CG15661	293	293	624	624	3.06e-28	1.09e-27	917	67	477	477	62	62	2.41e-80	4.35e-80	9.55259e-20	1.46e-19	1	1	-1.09065	-2.94365	1.09065	1.853	37.0508
CG6220	0	1	98	98	3.16e-28	1.13e-27	99	0	49	49	0	1	9.06e-14	3.88e-14	1	0.246323	1	0	-6.61471	-5.61471	6.61471	1	86.8675
CG3331	3033	3033	2234	2234	3.18e-28	1.13e-27	5267	508	654	654	468	468	3.11e-08	1.02e-08	4.50936e-22	7.8e-22	1	1	0.441116	-0.482782	0.441116	0.923898	32.3159
CG12117	1438	1438	906	906	3.23e-28	1.15e-27	2344	602	411	411	554	554	4.67e-06	1.34e-06	0.0383612	0.013263	1	0	0.666481	0.430748	0.666481	0.235733	73.8717
CG32160	68	68	263	263	3.36e-28	1.2e-27	331	9	43	43	9	9	2.04e-06	6e-07	0.710809	0.186738	1	0	-1.95146	-2.25634	1.95146	0.304884	86.4877
CG30179	2474	2474	1759	1759	3.81e-28	1.35e-27	4233	580	874	874	534	534	1.1e-19	5.93e-20	8.79143e-41	3.01e-40	1	1	0.49209	-0.710794	0.49209	1.20288	29.0323
CG4634	4324	4324	5409	5409	3.86e-28	1.37e-27	9733	2770	2701	2701	2548	2548	0.0358952	0.00746028	1.49362e-06	9.07e-07	1	1	-0.322995	-0.0841284	0.322995	0.238867	57.4866
CG6492	1613	1613	1047	1047	3.98e-28	1.41e-27	2660	683	589	589	629	629	0.26378	0.0489791	1.74897e-07	1.16e-07	1	1	0.623485	0.0947924	0.623485	0.528693	54.1136
CG2991	1993	1993	1358	1358	4.51e-28	1.6e-27	3351	863	626	626	794	794	9.14e-06	2.57e-06	0.0245187	0.00879583	1	0	0.553458	0.342976	0.553458	0.210482	72.4479
CG16989	942	942	524	524	5.56e-28	1.97e-27	1466	765	330	330	704	704	8.86e-32	6.78e-32	0.0489193	0.0166445	1	0	0.84616	1.09311	0.84616	0.246949	77.4086
CG5493	489	489	895	895	5.57e-28	1.97e-27	1384	88	369	369	81	81	5.74e-45	5.8e-45	1.36812e-12	1.37e-12	1	1	-0.872053	-2.18763	0.872053	1.31557	39.863
CG17440	5	5	114	114	5.74e-28	2.03e-27	119	7	80	80	7	7	8.26e-17	3.99e-17	0.366973	0.104424	1	0	-4.51096	-3.51457	4.51096	0.996389	81.908
CG1915	9861	9861	11462	11462	5.81e-28	2.05e-27	21323	2876	6297	6297	2646	2646	4.940656e-324	4.446591e-323	1.2123e-162	2.08e-161	1	1	-0.217053	-1.25085	0.217053	1.0338	17.3524
CG12163	6963	6963	8318	8318	5.93e-28	2.09e-27	15281	3206	3423	3423	2949	2949	3.06e-09	1.06e-09	0.338188	0.0972135	1	0	-0.256528	-0.215035	0.256528	0.0414922	86.0774
CG16732	97	97	0	1	6.25e-28	2.2e-27	98	39	0	1	36	36	5.53e-10	2e-10	0.474516	0.131031	1	0	6.59991	5.16993	6.59991	1.42999	82.1917
CG12581	1986	1986	1354	1354	6.58e-28	2.32e-27	3340	729	566	566	671	671	0.00309113	0.000713086	0.00152737	0.000653789	1	1	0.552638	0.245511	0.552638	0.307127	64.2778
CG32391	15	15	145	145	6.83e-28	2.4e-27	160	7	56	56	7	7	1.36e-10	5.06e-11	0.803296	0.207141	1	0	-3.27302	-3	3.27302	0.273018	92.3007
CG8453	8471	8471	7105	7105	7.09e-28	2.49e-27	15576	3284	4766	4766	3021	3021	1.16e-87	2.32e-87	1.9314e-112	2.04e-111	1	1	0.253698	-0.657753	0.253698	0.91145	21.7739
CG2050	2288	2288	1606	1606	7.34e-28	2.58e-27	3894	7852	2303	2303	7223	7223	0	0	7.04601e-84	5.53e-83	1	1	0.510615	1.64908	0.510615	1.13847	30.9636
CG7968	994	994	564	564	7.53e-28	2.64e-27	1558	233	415	415	215	215	1.29e-15	5.93e-16	1.31048e-36	3.95e-36	1	1	0.817551	-0.948775	0.817551	1.76633	31.6405
CG30424	173	173	26	26	7.74e-28	2.71e-27	199	83	18	18	77	77	7.25e-10	2.6e-10	0.221114	0.0664225	1	0	2.73419	2.09686	2.73419	0.637327	81.0967
CG10348	418	418	159	159	8.08e-28	2.83e-27	577	45	34	34	42	42	0.422191	0.0757973	0.0030665	0.00126031	1	1	1.39448	0.304855	1.39448	1.08962	56.1361
CG7611	4894	4894	3872	3872	9.53e-28	3.34e-27	8766	2237	1391	1391	2058	2058	5.52e-30	4.02e-30	0.00011504	5.67e-05	1	1	0.337935	0.565121	0.337935	0.227185	59.7988
CG8536	477	477	197	197	1.04e-27	3.65e-27	674	228	133	133	210	210	3.79e-05	1.02e-05	0.00232765	0.000973268	1	1	1.27579	0.658963	1.27579	0.616831	67.4087
CG6992	469	469	192	192	1.15e-27	4.01e-27	661	161	77	77	149	149	1.92e-06	5.68e-07	0.179753	0.055062	1	0	1.28848	0.952382	1.28848	0.3361	79.3116
CG7717	1291	1291	1906	1906	1.25e-27	4.36e-27	3197	1645	1042	1042	1514	1514	9.4e-21	5.21e-21	5.04628e-46	2.03e-45	1	1	-0.562059	0.53901	0.562059	1.10107	33.7953
CG1668	3403	3403	2564	2564	1.67e-27	5.83e-27	5967	755	1741	1741	695	695	1e-102	2.35e-102	1.7589e-127	2.15e-126	1	1	0.408411	-1.32483	0.408411	1.73324	19.0699
CG9172	6937	6937	5715	5715	1.72e-27	5.99e-27	12652	2745	3056	3056	2525	2525	1.25e-12	5.09e-13	8.35579e-33	2.21e-32	1	1	0.279558	-0.275361	0.279558	0.55492	33.501
CG31783	2421	2421	1723	1723	1.93e-27	6.73e-27	4144	456	874	874	420	420	4.19e-37	3.63e-37	1.91231e-60	1.05e-59	1	1	0.49068	-1.05724	0.49068	1.54792	24.0694
CG13425	946	946	531	531	2.12e-27	7.38e-27	1477	720	347	347	663	663	1.62e-23	9.73e-24	0.41736	0.117227	1	0	0.833128	0.934073	0.833128	0.100945	89.193
CG8979	1097	1097	646	646	2.24e-27	7.78e-27	1743	655	337	337	603	603	3.27e-18	1.67e-18	0.556627	0.150655	1	0	0.763957	0.839409	0.763957	0.075452	91.0113
CG33306	900	900	1421	1421	2.24e-27	7.8e-27	2321	568	715	715	523	523	5.36e-08	1.74e-08	0.0481628	0.0164053	1	0	-0.65891	-0.451132	0.65891	0.207777	76.0263
CG3672	3337	3337	2509	2509	2.37e-27	8.22e-27	5846	1241	1353	1353	1142	1142	2.59e-05	7.04e-06	3.00199e-21	4.97e-21	1	1	0.411439	-0.244599	0.411439	0.656038	38.5431
CG11255	1727	1727	2424	2424	2.53e-27	8.79e-27	4151	1000	1202	1202	920	920	1e-09	3.58e-10	0.18565	0.0566705	1	0	-0.489122	-0.385731	0.489122	0.10339	82.5505
CG5224	383	383	744	744	2.84e-27	9.85e-27	1127	213	285	285	196	196	5.74e-05	1.52e-05	0.0106688	0.00406114	1	1	-0.957958	-0.540108	0.957958	0.41785	69.6288
CG13078	27	27	173	173	2.89e-27	9.99e-27	200	3	110	110	3	3	4.63e-29	3.29e-29	0.00117265	0.000509864	1	1	-2.67974	-5.1964	2.67974	2.51666	51.5692
CG6850	2111	2111	2874	2874	2.97e-27	1.03e-26	4985	1873	1777	1777	1723	1723	0.370328	0.0670873	4.09084e-10	3.43e-10	1	1	-0.445133	-0.044521	0.445133	0.400613	52.6321
CG5946	3089	3089	2296	2296	3.01e-27	1.04e-26	5385	1191	1188	1188	1096	1096	0.0568714	0.0115196	5.10906e-14	5.63e-14	1	1	0.428017	-0.116287	0.428017	0.544304	44.0201
CG5490	1154	1154	1734	1734	3.07e-27	1.06e-26	2888	2218	1360	1360	2041	2041	1.28e-31	9.8e-32	6.93246e-57	3.54e-56	1	1	-0.587461	0.58567	0.587461	1.17313	33.3672
CG1618	1629	1629	1069	1069	3.42e-27	1.18e-26	2698	604	625	625	556	556	0.0478019	0.00978266	2.02681e-14	2.29e-14	1	1	0.607725	-0.168771	0.607725	0.776496	43.9037
CG5751	163	163	23	23	3.51e-27	1.21e-26	186	44	22	22	41	41	0.022575	0.00479872	0.000213794	0.000102407	1	1	2.82517	0.89812	2.82517	1.92705	59.4495
CG32442	208	208	43	43	3.87e-27	1.33e-26	251	119	24	24	110	110	2.36e-14	1.03e-14	0.888084	0.225494	1	0	2.27417	2.1964	2.27417	0.0777778	96.6931
CG6141	11432	11432	13120	13120	4.74e-27	1.63e-26	24552	11019	7112	7112	10136	10136	7.79e-118	2.13e-117	8.5476e-134	1.12e-132	1	1	-0.19869	0.511161	0.19869	0.709851	21.8691
CG12286	1428	1428	909	909	5.35e-27	1.84e-26	2337	1611	605	605	1482	1482	1.77e-84	3.37e-84	4.27544e-12	4.12e-12	1	1	0.651644	1.29254	0.651644	0.640895	50.4158
CG33103	4177	4177	3250	3250	5.39e-27	1.85e-26	7427	2137	1319	1319	1966	1966	1.2e-29	8.67e-30	0.000511905	0.000233449	1	1	0.362027	0.575819	0.362027	0.213791	62.8718
CG31089	156	156	408	408	5.58e-27	1.91e-26	564	23	243	243	22	22	2.76e-48	3.01e-48	3.10816e-11	2.82e-11	1	1	-1.38702	-3.46538	1.38702	2.07836	40.0251
CG1842	6	6	114	114	5.8e-27	1.99e-26	120	483	143	143	445	445	5.09e-37	4.4e-37	7.64179e-51	3.42e-50	1	1	-4.24793	1.63779	4.24793	5.88572	41.919
CG6762	504	504	218	218	5.84e-27	2e-26	722	117	82	82	108	108	0.0694442	0.0139255	0.000947686	0.000416625	1	1	1.2091	0.397335	1.2091	0.81176	59.8309
CG30287	64	64	249	249	6.44e-27	2.21e-26	313	11	66	66	11	11	1.05e-10	3.93e-11	0.260022	0.0769336	1	0	-1.96	-2.58496	1.96	0.624961	75.8232
CG1944	273	273	585	585	6.72e-27	2.3e-26	858	80	216	216	74	74	2.76e-17	1.36e-17	0.0459143	0.0156895	1	0	-1.09954	-1.54543	1.09954	0.445898	71.1474
CG17508	1947	1947	1333	1333	6.99e-27	2.39e-26	3280	1423	978	978	1309	1309	4.77e-12	1.9e-12	0.115176	0.0366387	1	0	0.546576	0.420559	0.546576	0.126017	81.264
CG18030	141	141	15	15	7.36e-27	2.51e-26	156	256	10	10	236	236	3.43e-57	4.49e-57	0.0330203	0.0115339	1	0	3.23266	4.56071	3.23266	1.32805	70.8806
CG1354	1052	1052	1604	1604	7.35e-27	2.51e-26	2656	1683	1016	1016	1549	1549	5.52e-26	3.58e-26	3.13044e-51	1.42e-50	1	1	-0.608539	0.608437	0.608539	1.21698	33.3352
CG3835	6942	6942	5737	5737	1.01e-26	3.45e-26	12679	2393	1882	1882	2202	2202	5.91e-07	1.81e-07	0.356838	0.101871	1	0	0.275055	0.226548	0.275055	0.048507	85.0084
CG9451	713	713	364	364	1.03e-26	3.5e-26	1077	201	265	265	185	185	0.000189159	4.83e-05	1.80062e-19	2.71e-19	1	1	0.969964	-0.518467	0.969964	1.48843	39.4552
CG3431	1309	1309	817	817	1.06e-26	3.59e-26	2126	1383	349	349	1273	1273	2.3e-123	6.55e-123	4.23528e-29	9.82e-29	1	1	0.680057	1.86693	0.680057	1.18688	36.4264
CG31193	113	113	6	6	1.1e-26	3.74e-26	119	45	88	88	42	42	6.74e-05	1.78e-05	4.1676e-27	8.89e-27	1	1	4.23522	-1.06711	4.23522	5.30233	44.4057
CG2926	1772	1772	1191	1191	1.14e-26	3.87e-26	2963	1983	728	728	1824	1824	1.43e-107	3.54e-107	1.01694e-19	1.55e-19	1	1	0.573205	1.3251	0.573205	0.75189	43.2577
CG3626	1096	1096	652	652	1.68e-26	5.71e-26	1748	746	443	443	687	687	3.97e-13	1.65e-13	0.306999	0.0891987	1	0	0.749304	0.633003	0.749304	0.116301	86.5642
CG9436	2668	2668	1945	1945	1.71e-26	5.79e-26	4613	1068	967	967	983	983	0.734105	0.125723	3.3764e-08	2.41e-08	1	1	0.455989	0.0236755	0.455989	0.432313	51.3326
CG5322	493	493	213	213	1.86e-26	6.3e-26	706	385	58	58	355	355	3.81e-53	4.61e-53	5.86925e-10	4.85e-10	1	1	1.21073	2.61369	1.21073	1.40296	46.3227
CG33850	1	1	92	92	1.9e-26	6.42e-26	93	47	28	28	44	44	0.0763691	0.015249	1.04359e-19	1.59e-19	1	1	-6.52356	0.652077	6.52356	7.17564	47.62
CG3656	548	548	250	250	1.93e-26	6.54e-26	798	102	121	121	94	94	0.0759535	0.0151679	3.80176e-11	3.43e-11	1	1	1.13225	-0.364274	1.13225	1.49652	43.0714
CG17739	2400	2400	1718	1718	2.02e-26	6.82e-26	4118	524	767	767	482	482	6.99e-16	3.25e-16	2.43847e-34	6.76e-34	1	1	0.482304	-0.670193	0.482304	1.1525	29.5023
CG6020	17787	17787	15838	15838	2.25e-26	7.6e-26	33625	6105	6894	6894	5616	5616	3.06e-30	2.24e-30	8.35893e-53	3.93e-52	1	1	0.167433	-0.295798	0.167433	0.463231	26.5487
CG3174	3313	3313	4236	4236	2.28e-26	7.7e-26	7549	695	1490	1490	640	640	1.18e-77	2.06e-77	3.28336e-31	8.17e-31	1	1	-0.354564	-1.21917	0.354564	0.864604	29.0825
CG4042	436	436	809	809	2.32e-26	7.83e-26	1245	292	412	412	269	269	4.74e-08	1.55e-08	0.0537347	0.0181871	1	0	-0.891812	-0.615038	0.891812	0.276773	76.3155
CG10423	4117	4117	3208	3208	2.34e-26	7.87e-26	7325	4345	1951	1951	3997	3997	4.39e-158	1.63e-157	2.0792e-38	6.65e-38	1	1	0.359919	1.0347	0.359919	0.674784	34.7848
CG4120	883	883	491	491	2.38e-26	8e-26	1374	276	304	304	254	254	0.0379531	0.00787205	5.02872e-14	5.55e-14	1	1	0.84669	-0.259243	0.84669	1.10593	43.3617
CG7953	10098	10098	11665	11665	2.41e-26	8.1e-26	21763	2060	6589	6589	1895	1895	0	0	0	0	1	1	-0.208117	-1.79786	0.208117	1.58974	11.5758
CG1718	1404	1404	2025	2025	2.49e-26	8.36e-26	3429	781	1318	1318	719	719	1.23e-40	1.14e-40	3.56839e-05	1.86e-05	1	1	-0.528379	-0.874287	0.528379	0.345908	60.4354
CG16996	711	711	365	365	2.67e-26	8.96e-26	1076	419	205	205	386	386	8.5e-14	3.64e-14	0.787303	0.203873	1	0	0.961953	0.912977	0.961953	0.0489762	95.1553
CG31866	7	7	115	115	2.68e-26	8.98e-26	122	4	59	59	4	4	1.38e-13	5.87e-14	1	0.246323	1	0	-4.03814	-3.88264	4.03814	0.155492	96.2922
CG5621	544	544	248	248	2.71e-26	9.07e-26	792	165	192	192	152	152	0.0353358	0.00735146	1.49975e-14	1.7e-14	1	1	1.13327	-0.337035	1.13327	1.4703	43.5274
CG12006	522	522	923	923	3.27e-26	1.1e-25	1445	820	634	634	755	755	0.00127466	0.000304041	1.57601e-22	2.79e-22	1	1	-0.822281	0.251994	0.822281	1.07427	43.3565
CG34043	507	507	903	903	3.33e-26	1.11e-25	1410	145	435	435	134	134	4.5e-38	3.96e-38	7.62188e-08	5.24e-08	1	1	-0.83274	-1.69878	0.83274	0.866042	49.0198
CG11880	2511	2511	1815	1815	3.33e-26	1.11e-25	4326	1774	764	764	1632	1632	9.06e-72	1.48e-71	3.51811e-16	4.38e-16	1	1	0.468292	1.095	0.468292	0.626704	42.7666
CG5962	20393	20393	22589	22589	3.33e-26	1.11e-25	42982	3519	11305	11305	3237	3237	4.940656e-324	4.446591e-323	0	0	1	1	-0.147546	-1.80423	0.147546	1.65669	8.1778
CG18673	0	1	91	91	3.76e-26	1.25e-25	92	0	135	135	0	1	3.15e-39	2.84e-39	1	0.246323	1	0	-6.50779	-7.07682	6.50779	0.569021	91.9594
CG33105	91	91	0	1	3.76e-26	1.25e-25	92	40	0	1	37	37	2.84e-10	1.04e-10	0.500775	0.137248	1	0	6.50779	5.20945	6.50779	1.29834	83.3677
CG4523	3569	3569	2730	2730	3.93e-26	1.31e-25	6299	2002	1787	1787	1842	1842	0.370043	0.0670505	1.40748e-08	1.04e-08	1	1	0.386619	0.0437334	0.386619	0.342886	52.9975
CG13214	815	815	442	442	4.07e-26	1.35e-25	1257	117	134	134	108	108	0.107849	0.021134	5.94643e-09	4.52e-09	1	1	0.882754	-0.311202	0.882754	1.19396	42.5073
CG3203	6854	6854	8149	8149	4.06e-26	1.35e-25	15003	6375	4356	4356	5864	5864	1.98e-50	2.25e-50	2.10237e-74	1.49e-73	1	1	-0.249677	0.428881	0.249677	0.678558	26.898
CG9456	589	589	1010	1010	4.35e-26	1.44e-25	1599	176	450	450	162	162	2.69e-32	2.09e-32	3.74241e-06	2.17e-06	1	1	-0.778016	-1.47393	0.778016	0.695915	52.7851
CG1753	859	859	1355	1355	4.36e-26	1.45e-25	2214	1472	569	569	1354	1354	1.5e-73	2.52e-73	1.36765e-93	1.19e-92	1	1	-0.657563	1.25073	0.657563	1.90829	25.6275
CG34226	114	114	7	7	5.05e-26	1.68e-25	121	8	13	13	8	8	0.38331	0.0692711	1.18605e-08	8.8e-09	1	1	4.02554	-0.70044	4.02554	4.72597	45.9982
CG5044	1852	1852	1264	1264	5.25e-26	1.74e-25	3116	860	645	645	792	792	0.000115941	3.01e-05	0.00663363	0.00260263	1	1	0.551088	0.296201	0.551088	0.254886	68.3754
CG8549	397	397	153	153	5.56e-26	1.84e-25	550	352	114	114	324	324	2.17e-24	1.34e-24	0.564194	0.152384	1	0	1.37561	1.50696	1.37561	0.131353	91.2836
CG8657	772	772	1244	1244	5.76e-26	1.9e-25	2016	437	584	584	402	402	7.47e-09	2.53e-09	0.202594	0.0613925	1	0	-0.688314	-0.538773	0.688314	0.149541	82.1519
CG14907	132	132	13	13	5.74e-26	1.9e-25	145	133	24	24	123	123	3.18e-17	1.56e-17	0.0777523	0.0255296	1	0	3.34395	2.35755	3.34395	0.986402	77.2212
CG8160	73	73	261	261	6.1e-26	2.02e-25	334	30	16	16	28	28	0.0961417	0.0189598	4.2101e-08	2.98e-08	1	1	-1.83808	0.807355	1.83808	2.64544	40.9964
CG11148	3207	3207	2418	2418	6.71e-26	2.21e-25	5625	3098	1673	1673	2850	2850	3.11e-69	4.85e-69	9.99926e-10	8.09e-10	1	1	0.40741	0.768524	0.40741	0.361114	53.012
CG9427	480	480	207	207	6.99e-26	2.3e-25	687	120	56	56	111	111	2.51e-05	6.81e-06	0.401276	0.113058	1	0	1.2134	0.987061	1.2134	0.226343	84.279
CG31683	90	90	0	1	7.43e-26	2.45e-25	91	69	0	1	64	64	3.58e-18	1.82e-18	1	0.246323	1	0	6.49185	6	6.49185	0.491853	92.9571
CG3984	1390	1390	2000	2000	9.82e-26	3.23e-25	3390	186	603	603	172	172	7.11e-57	9.25e-57	1.11545e-23	2.09e-23	1	1	-0.524915	-1.80975	0.524915	1.28483	29.0049
CG2691	968	968	560	560	1.13e-25	3.72e-25	1528	3097	697	697	2849	2849	2.62e-306	2.02e-305	2.68583e-36	7.9e-36	1	1	0.78958	2.03123	0.78958	1.24164	38.8721
CG8712	61	61	237	237	1.19e-25	3.9e-25	298	147	87	87	136	136	0.00125658	0.000300162	2.6256e-21	4.36e-21	1	1	-1.95801	0.644519	1.95801	2.60253	42.9337
CG12977	180	180	437	437	1.28e-25	4.21e-25	617	111	107	107	103	103	0.836056	0.141677	2.51096e-07	1.65e-07	1	1	-1.27964	-0.0549665	1.27964	1.22467	51.0974
CG2718	4486	4486	3549	3549	1.41e-25	4.62e-25	8035	2475	1299	1299	2277	2277	9.58e-61	1.32e-60	2.11671e-15	2.52e-15	1	1	0.338017	0.809733	0.338017	0.471716	41.7443
CG2788	310	310	628	628	1.43e-25	4.69e-25	938	80	278	278	74	74	6.37e-29	4.49e-29	2.14184e-05	1.15e-05	1	1	-1.0185	-1.90949	1.0185	0.890991	53.3387
CG10267	534	534	245	245	1.61e-25	5.26e-25	779	406	226	226	374	374	1.63e-09	5.74e-10	0.016254	0.00600834	1	0	1.12406	0.726715	1.12406	0.397342	73.8831
CG1161	1392	1392	894	894	1.7e-25	5.55e-25	2286	570	393	393	525	525	1.49e-05	4.11e-06	0.0557769	0.0188161	1	0	0.638812	0.417788	0.638812	0.221024	74.2946
CG7888	1333	1333	847	847	1.79e-25	5.86e-25	2180	554	507	507	510	510	0.949998	0.158774	6.21539e-09	4.71e-09	1	1	0.654243	0.0085115	0.654243	0.645731	50.3274
CG10000	21	21	151	151	1.87e-25	6.12e-25	172	8	74	74	8	8	1.65e-14	7.24e-15	0.675312	0.178545	1	0	-2.84609	-3.20945	2.84609	0.363366	88.6783
CG1121	1729	1729	2397	2397	2.31e-25	7.55e-25	4126	396	867	867	365	365	1.57e-47	1.69e-47	4.59029e-15	5.37e-15	1	1	-0.471292	-1.24814	0.471292	0.776843	37.7597
CG4178	16737	16737	14887	14887	2.47e-25	8.05e-25	31624	433	2267	2267	399	399	8.335607e-316	6.679577e-315	0	0	1	1	0.168988	-2.50632	0.168988	2.67531	5.94128
CG7365	423	423	782	782	2.73e-25	8.9e-25	1205	91	464	464	84	84	1.11e-64	1.61e-64	1.86309e-18	2.66e-18	1	1	-0.886511	-2.46566	0.886511	1.57915	35.9543
CG33214	1910	1910	2608	2608	2.75e-25	8.95e-25	4518	1374	1443	1443	1264	1264	0.000620918	0.000152352	0.000263396	0.000124874	1	1	-0.449371	-0.191075	0.449371	0.258296	63.5003
CG12736	1024	1024	606	606	2.88e-25	9.36e-25	1630	669	284	284	616	616	6.18e-29	4.37e-29	0.0047073	0.00188943	1	1	0.756826	1.11704	0.756826	0.360213	67.7528
CG18107	81	81	272	272	2.93e-25	9.51e-25	353	178	280	280	164	164	4.07e-08	1.33e-08	2.07747e-05	1.11e-05	1	1	-1.74761	-0.771731	1.74761	0.975882	64.168
CG8503	666	666	1101	1101	3.15e-25	1.02e-24	1767	664	524	524	611	611	0.0106573	0.00233582	1.50579e-17	2.04e-17	1	1	-0.72522	0.221606	0.72522	0.946826	43.3732
CG1651	3534	3534	2715	2715	3.67e-25	1.19e-24	6249	2686	1832	1832	2471	2471	1.96e-22	1.14e-22	0.378857	0.107457	1	0	0.38035	0.431676	0.38035	0.0513257	88.1101
CG17385	944	944	1450	1450	3.78e-25	1.23e-24	2394	510	614	614	470	470	1.37e-05	3.79e-06	0.0306605	0.0107833	1	0	-0.619194	-0.385578	0.619194	0.233616	72.6063
CG12051	1738	1738	1180	1180	4.52e-25	1.46e-24	2918	3379	1395	1395	3109	3109	2.5e-147	8.55e-147	8.59832e-17	1.11e-16	1	1	0.558641	1.15619	0.558641	0.597544	48.3176
CG10737	4676	4676	3728	3728	4.6e-25	1.49e-24	8404	1637	1664	1664	1506	1506	0.00528722	0.00119158	6.21078e-15	7.2e-15	1	1	0.326873	-0.143934	0.326873	0.470807	40.978
CG7054	2019	2019	1414	1414	4.88e-25	1.58e-24	3433	1098	450	450	1010	1010	1.13e-49	1.26e-49	6.73734e-12	6.37e-12	1	1	0.513859	1.16636	0.513859	0.6525	44.0567
CG2781	1811	1811	1241	1241	5.18e-25	1.67e-24	3052	658	610	610	606	606	0.931446	0.156054	1.93678e-08	1.41e-08	1	1	0.545283	-0.00949145	0.545283	0.554775	49.5686
CG4080	755	755	1212	1212	5.26e-25	1.7e-24	1967	599	427	427	551	551	8.22e-05	2.16e-05	3.31625e-20	5.2e-20	1	1	-0.682841	0.367816	0.682841	1.05066	39.3909
CG4000	38301	38301	41212	41212	5.66e-25	1.83e-24	79513	10595	23710	23710	9746	9746	4.940656e-324	4.446591e-323	0	0	1	1	-0.105682	-1.28261	0.105682	1.17693	8.23962
CG11151	3420	3420	4328	4328	5.97e-25	1.93e-24	7748	1135	1876	1876	1044	1044	4.39e-54	5.43e-54	3.71344e-15	4.37e-15	1	1	-0.339704	-0.845538	0.339704	0.505834	40.1761
CG16721	2987	2987	2242	2242	6.61e-25	2.13e-24	5229	1441	1251	1251	1326	1326	0.144903	0.0279188	2.34959e-06	1.39e-06	1	1	0.413911	0.083999	0.413911	0.329912	55.6464
CG30118	4761	4761	3807	3807	6.61e-25	2.13e-24	8568	2186	2166	2166	2011	2011	0.0171709	0.00368817	3.53786e-15	4.18e-15	1	1	0.32261	-0.10712	0.32261	0.42973	42.8809
CG7456	702	702	367	367	6.99e-25	2.25e-24	1069	633	197	197	583	583	4.28e-45	4.33e-45	2.7271e-05	1.44e-05	1	1	0.935691	1.5653	0.935691	0.629609	59.7771
CG4610	491	491	219	219	7.07e-25	2.27e-24	710	612	190	190	563	563	1.13e-43	1.12e-43	0.0169952	0.00625873	1	0	1.16479	1.56714	1.16479	0.402343	74.3262
CG11015	5026	5026	6113	6113	7.2e-25	2.31e-24	11139	2090	3032	3032	1923	1923	2.78e-56	3.59e-56	8.17533e-14	8.92e-14	1	1	-0.28247	-0.656911	0.28247	0.374441	42.9997
CG10640	1928	1928	1340	1340	7.35e-25	2.36e-24	3268	1581	812	812	1455	1455	5.56e-42	5.34e-42	0.000108839	5.37e-05	1	1	0.524872	0.841468	0.524872	0.316595	62.3758
CG10840	2403	2403	1741	1741	7.83e-25	2.51e-24	4144	3370	1192	1192	3100	3100	7.2e-193	3.35e-192	4.90273e-43	1.8e-42	1	1	0.46492	1.37888	0.46492	0.913964	33.7172
CG10663	106	106	313	313	8.28e-25	2.65e-24	419	33	262	262	31	31	9.93e-47	1.05e-46	6.57441e-07	4.13e-07	1	1	-1.5621	-3.07923	1.5621	1.51713	50.7302
CG3922	3709	3709	4649	4649	8.51e-25	2.72e-24	8358	3455	2545	2545	3178	3178	6.13e-17	2.97e-17	1.13419e-38	3.66e-38	1	1	-0.32589	0.320453	0.32589	0.646344	33.5197
CG7739	1470	1470	2082	2082	8.93e-25	2.85e-24	3552	764	1163	1163	703	703	1.26e-26	8.34e-27	0.00865367	0.00334544	1	1	-0.502154	-0.726255	0.502154	0.224101	69.143
CG1836	1496	1496	2112	2112	1.03e-24	3.29e-24	3608	1505	1053	1053	1385	1385	1.9e-11	7.33e-12	9.12296e-32	2.33e-31	1	1	-0.4975	0.395381	0.4975	0.89288	35.7816
CG5909	272	272	567	567	1.09e-24	3.49e-24	839	124	242	242	115	115	1.59e-11	6.16e-12	1	0.246323	1	0	-1.05974	-1.07337	1.05974	0.0136311	98.7301
CG6359	1576	1576	1051	1051	1.09e-24	3.49e-24	2627	1026	494	494	944	944	7.37e-33	5.78e-33	0.000387608	0.00017977	1	1	0.584505	0.934276	0.584505	0.349771	62.5623
CG33466	222	222	494	494	1.13e-24	3.61e-24	716	162	237	237	150	150	1.14e-05	3.18e-06	0.0111662	0.00423407	1	1	-1.15395	-0.659925	1.15395	0.494027	70.0222
CG4568	109	109	7	7	1.2e-24	3.81e-24	116	37	21	21	35	35	0.0814268	0.0161979	5.52521e-07	3.49e-07	1	1	3.96083	0.736966	3.96083	3.22386	55.1287
CG3168	16642	16642	14825	14825	1.31e-24	4.17e-24	31467	5332	7356	7356	4905	4905	3.39e-109	8.55e-109	4.6117e-130	5.9e-129	1	1	0.166797	-0.584668	0.166797	0.751465	18.1644
CG12068	58	58	226	226	1.38e-24	4.38e-24	284	65	145	145	60	60	2.65e-09	9.22e-10	0.0250643	0.00896799	1	0	-1.9622	-1.27302	1.9622	0.689179	74.0067
CG8187	680	680	353	353	1.46e-24	4.64e-24	1033	352	179	179	324	324	1.01e-10	3.79e-11	0.607193	0.162638	1	0	0.945867	0.856034	0.945867	0.0898323	91.3264
CG3164	12475	12475	10911	10911	1.54e-24	4.89e-24	23386	4239	4869	4869	3900	3900	4.29e-25	2.71e-25	1.4636e-45	5.8e-45	1	1	0.193256	-0.320151	0.193256	0.513408	27.3477
CG10561	1568	1568	1046	1046	1.55e-24	4.9e-24	2614	518	481	481	477	477	0.922792	0.154699	5.74755e-08	4.01e-08	1	1	0.584043	-0.0120476	0.584043	0.59609	49.4896
CG14996	2891	2891	2166	2166	2.02e-24	6.39e-24	5057	1561	1131	1131	1436	1436	1.89e-09	6.63e-10	0.31596	0.0914773	1	0	0.416535	0.344457	0.416535	0.0720785	85.2484
CG10233	916	916	530	530	2.3e-24	7.3e-24	1446	81	195	195	75	75	1.76e-13	7.44e-14	2.33078e-27	5.03e-27	1	1	0.789355	-1.37851	0.789355	2.16787	26.6925
CG33173	421	421	175	175	2.32e-24	7.33e-24	596	655	375	375	603	603	3.07e-13	1.29e-13	0.000318009	0.000149324	1	1	1.26647	0.685267	1.26647	0.581198	68.5442
CG34335	8222	8222	9581	9581	2.37e-24	7.49e-24	17803	5718	4985	4985	5260	5260	0.00678577	0.00151312	9.02969e-17	1.16e-16	1	1	-0.220687	0.0774693	0.220687	0.298156	42.5344
CG18594	6114	6114	7293	7293	2.43e-24	7.68e-24	13407	2128	4123	4123	1958	1958	3.27e-173	1.35e-172	1.90811e-70	1.25e-69	1	1	-0.254396	-1.07431	0.254396	0.819918	23.6798
CG10208	737	737	396	396	2.47e-24	7.8e-24	1133	230	137	137	212	212	7.03e-05	1.85e-05	0.143071	0.0447299	1	0	0.896164	0.629888	0.896164	0.266276	77.0934
CG10958	100	100	300	300	2.59e-24	8.17e-24	400	64	123	123	59	59	2.4e-06	7.04e-07	0.0709446	0.0234842	1	0	-1.58496	-1.05987	1.58496	0.525091	75.1148
CG15203	385	385	721	721	3.24e-24	1.02e-23	1106	173	549	549	160	160	9.94e-51	1.14e-50	2.44542e-08	1.76e-08	1	1	-0.905141	-1.77873	0.905141	0.873593	50.8868
CG30425	7764	7764	6550	6550	3.5e-24	1.1e-23	14314	9604	4311	4311	8834	8834	4.940656e-324	4.446591e-323	2.8333e-107	2.83e-106	1	1	0.245305	1.03504	0.245305	0.789739	23.7
CG17646	1905	1905	1329	1329	3.76e-24	1.18e-23	3234	843	796	796	776	776	0.631802	0.109776	4.74717e-10	3.95e-10	1	1	0.51945	-0.0367118	0.51945	0.556162	48.2934
CG1814	723	723	387	387	3.94e-24	1.24e-23	1110	323	182	182	298	298	1.34e-07	4.26e-08	0.254618	0.0754074	1	0	0.901662	0.711374	0.901662	0.190288	82.5735
CG10534	107	107	7	7	4.23e-24	1.33e-23	114	28	2	2	26	26	3.03e-06	8.82e-07	1	0.246323	1	0	3.93411	3.70044	3.93411	0.233672	94.3934
CG3409	1828	1828	2493	2493	4.45e-24	1.4e-23	4321	1109	978	978	1021	1021	0.347536	0.0632935	7.97961e-11	7.06e-11	1	1	-0.447617	0.0620765	0.447617	0.509693	46.7578
CG14961	157	157	391	391	4.87e-24	1.53e-23	548	20	16	16	19	19	0.735879	0.125987	0.00219236	0.000919359	1	1	-1.3164	0.247928	1.3164	1.56433	45.6968
CG7631	199	199	455	455	5.32e-24	1.67e-23	654	37	217	217	35	35	2.99e-33	2.37e-33	1.29887e-07	8.75e-08	1	1	-1.1931	-2.63227	1.1931	1.43917	45.3259
CG8993	1656	1656	1124	1124	5.43e-24	1.7e-23	2780	662	502	502	609	609	0.0014609	0.000346651	0.00696149	0.00272256	1	1	0.559061	0.278755	0.559061	0.280306	66.6051
CG10672	1384	1384	902	902	5.66e-24	1.77e-23	2286	577	434	434	531	531	0.00198385	0.000466294	0.00387883	0.00157258	1	1	0.617645	0.291017	0.617645	0.326628	65.4096
CG7228	1982	1982	2669	2669	6.97e-24	2.18e-23	4651	1360	1365	1365	1251	1251	0.0271331	0.00571805	1.87895e-05	1.01e-05	1	1	-0.429342	-0.125819	0.429342	0.303523	58.5841
CG5550	209	209	469	469	7.25e-24	2.26e-23	678	52	206	206	48	48	1.7e-24	1.05e-24	0.000278693	0.000131643	1	1	-1.16608	-2.10154	1.16608	0.935453	55.4872
CG7433	3971	3971	4920	4920	8.02e-24	2.5e-23	8891	2325	2368	2368	2139	2139	0.000681676	0.000166713	0.00217358	0.000912107	1	1	-0.309156	-0.146733	0.309156	0.162423	65.5576
CG18853	83	83	0	1	8.79e-24	2.74e-23	84	42	0	1	39	39	7.46e-11	2.8e-11	0.54288	0.147405	1	0	6.37504	5.2854	6.37504	1.08964	85.4028
CG1698	751	751	410	410	9.06e-24	2.82e-23	1161	256	152	152	236	236	2.35e-05	6.39e-06	0.179869	0.0550853	1	0	0.873189	0.634716	0.873189	0.238473	78.548
CG1531	1659	1659	1129	1129	9.3e-24	2.89e-23	2788	1342	630	630	1235	1235	3.18e-45	3.23e-45	3.68367e-06	2.14e-06	1	1	0.555268	0.971087	0.555268	0.415819	57.1801
CG13890	762	762	1207	1207	9.3e-24	2.89e-23	1969	483	406	406	445	445	0.192673	0.0364642	2.96627e-11	2.7e-11	1	1	-0.663563	0.132326	0.663563	0.795888	45.4666
CG13969	636	636	1047	1047	9.76e-24	3.03e-23	1683	400	538	538	368	368	1.8e-08	5.97e-09	0.163041	0.0503767	1	0	-0.719163	-0.5479	0.719163	0.171262	80.7662
CG5001	1490	1490	991	991	1.1e-23	3.43e-23	2481	465	409	409	428	428	0.533855	0.0942379	6.95336e-06	3.93e-06	1	1	0.588355	0.06551	0.588355	0.522845	52.9477
CG10553	2393	2393	3138	3138	1.26e-23	3.9e-23	5531	635	1461	1461	585	585	4.77e-86	9.31e-86	7.13601e-32	1.83e-31	1	1	-0.391025	-1.32045	0.391025	0.929423	29.6131
CG11475	82	82	1	1	1.74e-23	5.39e-23	83	35	4	4	33	33	1.08e-06	3.25e-07	0.031051	0.0109081	1	0	6.35755	3.04439	6.35755	3.31316	65.7403
CG7769	1220	1220	775	775	1.83e-23	5.67e-23	1995	2334	735	735	2147	2147	6.6e-159	2.48e-158	6.4989e-23	1.17e-22	1	1	0.654613	1.54651	0.654613	0.891893	42.3285
CG33968	996	996	1493	1493	1.96e-23	6.08e-23	2489	360	554	554	332	332	8.44e-14	3.61e-14	0.186595	0.0569308	1	0	-0.583997	-0.738703	0.583997	0.154706	79.057
CG3126	1129	1129	703	703	1.97e-23	6.1e-23	1832	843	422	422	776	776	9.21e-25	5.76e-25	0.0835798	0.0272841	1	0	0.683449	0.878814	0.683449	0.195365	77.7695
CG17592	703	703	377	377	2.15e-23	6.65e-23	1080	493	289	289	454	454	1.53e-09	5.41e-10	0.0834836	0.0272563	1	0	0.89896	0.651623	0.89896	0.247337	78.4229
CG10118	6121	6121	5067	5067	2.22e-23	6.87e-23	11188	983	1482	1482	905	905	2.22e-32	1.72e-32	1.67869e-50	7.49e-50	1	1	0.272636	-0.711556	0.272636	0.984191	21.6924
CG7658	4	4	94	94	2.38e-23	7.34e-23	98	1	40	40	1	1	3.82e-11	1.45e-11	1	0.246323	1	0	-4.55459	-5.32193	4.55459	0.767339	85.5816
CG7664	1091	1091	674	674	2.57e-23	7.92e-23	1765	1292	450	450	1189	1189	6.62e-77	1.15e-76	2.9793e-11	2.71e-11	1	1	0.694831	1.40175	0.694831	0.706921	49.5687
CG18212	2073	2073	1481	1481	2.89e-23	8.91e-23	3554	1949	972	972	1793	1793	1.25e-55	1.59e-55	1.45804e-07	9.78e-08	1	1	0.485148	0.883347	0.485148	0.398199	54.9216
CG13533	451	451	801	801	3.13e-23	9.65e-23	1252	438	329	329	403	403	0.006932	0.00154489	1.63831e-16	2.08e-16	1	1	-0.828675	0.292692	0.828675	1.12137	42.4952
CG1539	7404	7404	6244	6244	3.18e-23	9.8e-23	13648	1565	2015	2015	1440	1440	1.27e-22	7.44e-23	8.35017e-40	2.77e-39	1	1	0.245834	-0.484711	0.245834	0.730545	25.1782
CG31265	451	451	200	200	3.26e-23	1e-22	651	106	180	180	98	98	9.98e-07	3e-07	6.9321e-22	1.19e-21	1	1	1.17313	-0.877143	1.17313	2.05027	36.3941
CG2009	1696	1696	2325	2325	3.28e-23	1.01e-22	4021	1780	1371	1371	1638	1638	1.22e-06	3.65e-07	2.56912e-24	4.93e-24	1	1	-0.455095	0.256707	0.455095	0.711801	39.0004
CG6342	6044	6044	5001	5001	3.34e-23	1.02e-22	11045	2639	2316	2316	2428	2428	0.107045	0.0209864	4.63146e-05	2.39e-05	1	1	0.273287	0.0681332	0.273287	0.205154	57.1203
CG5430	95	95	285	285	3.64e-23	1.12e-22	380	33	129	129	31	31	2.06e-15	9.4e-16	0.181446	0.055546	1	0	-1.58496	-2.05703	1.58496	0.472068	77.051
CG6981	1736	1736	2371	2371	3.67e-23	1.12e-22	4107	536	1151	1151	494	494	1.88e-60	2.59e-60	4.1803e-18	5.86e-18	1	1	-0.449729	-1.2203	0.449729	0.770576	36.8538
CG17836	6873	6873	5759	5759	3.8e-23	1.16e-22	12632	2433	2142	2142	2238	2238	0.151152	0.0290445	0.00015687	7.6e-05	1	1	0.255122	0.0632516	0.255122	0.19187	57.0752
CG14206	5159	5159	6215	6215	4.19e-23	1.28e-22	11374	6075	4205	4205	5588	5588	1.83e-44	1.83e-44	9.51466e-65	5.7e-64	1	1	-0.268663	0.410226	0.268663	0.678889	28.3534
CG2974	163	163	394	394	4.53e-23	1.38e-22	557	158	130	130	146	146	0.36661	0.0664944	4.50709e-11	4.04e-11	1	1	-1.27332	0.167457	1.27332	1.44078	46.9151
CG1692	366	366	685	685	4.81e-23	1.47e-22	1051	347	405	405	320	320	0.00179122	0.000422347	8.85604e-05	4.42e-05	1	1	-0.90426	-0.33985	0.90426	0.56441	61.57
CG6839	126	126	15	15	4.97e-23	1.52e-22	141	266	28	28	245	245	1.9e-44	1.9e-44	1	0.246323	1	0	3.07039	3.12928	3.07039	0.0588937	98.118
CG4867	841	841	483	483	5.52e-23	1.69e-22	1324	560	209	209	516	516	7.94e-31	5.92e-31	0.000518508	0.000236153	1	1	0.800083	1.30387	0.800083	0.503786	61.3622
CG10175	367	367	146	146	5.54e-23	1.69e-22	513	92	117	117	85	85	0.0289212	0.00607464	4.44014e-13	4.63e-13	1	1	1.32981	-0.460974	1.32981	1.79079	42.614
CG3456	2075	2075	1487	1487	6.35e-23	1.94e-22	3562	1016	471	471	935	935	1.19e-35	9.96e-36	7.24927e-08	4.99e-08	1	1	0.480707	0.989239	0.480707	0.508533	48.5936
CG33128	0	1	80	80	6.78e-23	2.06e-22	81	0	138	138	0	1	4.02e-40	3.72e-40	1	0.246323	1	0	-6.32193	-7.10852	6.32193	0.786596	88.9345
CG5999	80	80	0	1	6.78e-23	2.06e-22	81	46	0	1	43	43	5.12e-12	2.03e-12	1	0.246323	1	0	6.32193	5.42626	6.32193	0.895663	87.5906
CG7015	2590	2590	1928	1928	6.76e-23	2.06e-22	4518	2641	1119	1119	2430	2430	1.08e-109	2.73e-109	8.41738e-25	1.65e-24	1	1	0.425847	1.11875	0.425847	0.692899	38.0647
CG13607	2104	2104	1512	1512	6.85e-23	2.08e-22	3616	258	544	544	238	238	2.14e-28	1.49e-28	1.49944e-45	5.94e-45	1	1	0.476677	-1.19265	0.476677	1.66932	22.2123
CG12921	828	828	474	474	7.29e-23	2.21e-22	1302	391	161	161	360	360	1.59e-18	8.2e-19	0.0258446	0.00922433	1	0	0.804744	1.16094	0.804744	0.356193	69.3185
CG17333	1331	1331	870	870	7.5e-23	2.28e-22	2201	333	442	442	307	307	9.16e-07	2.76e-07	2.4425e-20	3.85e-20	1	1	0.613423	-0.525808	0.613423	1.13923	34.9997
CG6449	520	520	249	249	7.56e-23	2.29e-22	769	121	41	41	112	112	8.27e-09	2.8e-09	0.183228	0.0560287	1	0	1.06237	1.4498	1.06237	0.387437	73.2766
CG4848	813	813	463	463	8.19e-23	2.48e-22	1276	569	229	229	524	524	1.85e-27	1.25e-27	0.00766	0.00297865	1	1	0.812243	1.19422	0.812243	0.381976	68.0146
CG11409	383	383	157	157	8.32e-23	2.52e-22	540	222	39	39	205	205	2.21e-28	1.53e-28	8.20478e-05	4.11e-05	1	1	1.28658	2.39408	1.28658	1.1075	53.7401
CG31998	621	621	1018	1018	8.39e-23	2.54e-22	1639	849	541	541	781	781	4.37e-11	1.65e-11	1.59285e-30	3.89e-30	1	1	-0.713072	0.529694	0.713072	1.24277	36.4586
CG2707	17	17	130	130	9.66e-23	2.92e-22	147	1894	374	374	1743	1743	1.58e-210	8.17e-210	2.20246e-71	1.47e-70	1	1	-2.9349	2.22046	2.9349	5.15537	36.277
CG34424	1564	1564	1062	1062	1.06e-22	3.19e-22	2626	336	556	556	310	310	5.21e-17	2.53e-17	4.74708e-34	1.31e-33	1	1	0.558457	-0.842817	0.558457	1.40127	28.4966
CG34406	36	36	173	173	1.12e-22	3.38e-22	209	101	100	100	93	93	0.665933	0.115031	3.60136e-11	3.25e-11	1	1	-2.2647	-0.104697	2.2647	2.16001	51.1831
CG12813	269	269	547	547	1.21e-22	3.63e-22	816	74	370	370	69	69	7.63e-51	8.79e-51	1.83316e-11	1.68e-11	1	1	-1.02393	-2.42286	1.02393	1.39892	42.2615
CG13794	665	665	354	354	1.27e-22	3.82e-22	1019	166	140	140	153	153	0.483337	0.0858555	6.91945e-05	3.5e-05	1	1	0.909605	0.128105	0.909605	0.7815	53.7876
CG14606	391	391	163	163	1.29e-22	3.87e-22	554	191	85	85	176	176	1.84e-08	6.1e-09	0.37035	0.10525	1	0	1.2623	1.05004	1.2623	0.212256	85.6054
CG6058	32449	32449	30003	30003	1.31e-22	3.93e-22	62452	9191	13549	13549	8454	8454	8.69e-261	5.71e-260	1.529e-263	4.94e-262	1	1	0.113067	-0.68048	0.113067	0.793548	12.4714
CG6493	1267	1267	821	821	1.43e-22	4.3e-22	2088	1234	361	361	1136	1136	2.21e-93	4.75e-93	6.90316e-22	1.18e-21	1	1	0.625962	1.65389	0.625962	1.02793	37.8478
CG16728	259	259	532	532	1.52e-22	4.56e-22	791	300	275	275	276	276	1	0.164833	2.00651e-10	1.73e-10	1	1	-1.03847	0.00523665	1.03847	1.04371	49.8743
CG7616	288	288	572	572	2.04e-22	6.11e-22	860	203	220	220	187	187	0.112587	0.022002	2.32234e-05	1.24e-05	1	1	-0.989946	-0.234465	0.989946	0.755481	56.7166
CG7272	1513	1513	2098	2098	2.04e-22	6.12e-22	3611	458	827	827	422	422	8.87e-31	6.6e-31	4.04292e-07	2.59e-07	1	1	-0.471603	-0.970644	0.471603	0.499042	48.5866
CG13659	371	371	151	151	2.16e-22	6.46e-22	522	114	73	73	105	105	0.0198919	0.00424735	0.00383633	0.00155663	1	1	1.29687	0.524421	1.29687	0.77245	62.6713
CG6588	2902	2902	2207	2207	2.38e-22	7.11e-22	5109	1732	1410	1410	1594	1594	0.000838316	0.000203176	0.0011096	0.000483993	1	1	0.394961	0.176956	0.394961	0.218004	64.4345
CG3678	165	165	33	33	2.61e-22	7.8e-22	198	111	23	23	103	103	2.79e-13	1.17e-13	0.763752	0.198613	1	0	2.32193	2.16294	2.32193	0.15899	93.5915
CG2519	1124	1124	709	709	2.7e-22	8.07e-22	1833	1004	441	441	924	924	1.04e-39	9.5e-40	0.000224749	0.000107382	1	1	0.664785	1.06711	0.664785	0.40233	62.2974
CG6394	771	771	435	435	2.74e-22	8.19e-22	1206	537	179	179	494	494	5.44e-35	4.5e-35	2.55998e-05	1.36e-05	1	1	0.825715	1.46455	0.825715	0.638836	56.3801
CG3036	1956	1956	2612	2612	2.79e-22	8.34e-22	4568	1194	1400	1400	1099	1099	1.88e-09	6.58e-10	0.352853	0.100886	1	0	-0.417249	-0.349235	0.417249	0.0680131	85.9842
CG2530	1205	1205	774	774	2.89e-22	8.62e-22	1979	933	343	343	859	859	1.69e-51	1.99e-51	1.34679e-09	1.08e-09	1	1	0.638628	1.32445	0.638628	0.685822	48.2183
CG9672	855	855	499	499	2.91e-22	8.67e-22	1354	431	118	118	397	397	2.65e-36	2.25e-36	6.59146e-09	4.98e-09	1	1	0.776885	1.75035	0.776885	0.973468	44.3845
CG31449	6	6	97	97	3e-22	8.94e-22	103	22	415	415	21	21	3.83e-96	8.5e-96	0.620987	0.16588	1	0	-4.01495	-4.30465	4.01495	0.2897	93.2701
CG7920	1981	1981	1416	1416	3.04e-22	9.06e-22	3397	728	569	569	670	670	0.0044788	0.00101805	0.0107934	0.0041073	1	1	0.484408	0.235732	0.484408	0.248675	66.0782
CG3987	1670	1670	1155	1155	3.1e-22	9.2e-22	2825	541	635	635	498	498	5.23e-05	1.39e-05	5.49604e-18	7.64e-18	1	1	0.531955	-0.350611	0.531955	0.882566	37.6067
CG14857	336	336	637	637	3.15e-22	9.35e-22	973	59	283	283	55	55	4.1e-38	3.62e-38	6.36086e-11	5.66e-11	1	1	-0.922832	-2.3633	0.922832	1.44047	39.0485
CG14528	1464	1464	985	985	3.33e-22	9.89e-22	2449	196	475	475	181	181	2.47e-31	1.87e-31	1.41089e-49	6.2e-49	1	1	0.57172	-1.39194	0.57172	1.96366	22.5497
CG5885	2384	2384	1761	1761	3.7e-22	1.1e-21	4145	1524	984	984	1402	1402	1.14e-17	5.7e-18	0.335505	0.0964988	1	0	0.436989	0.510756	0.436989	0.0737668	85.5573
CG7874	15973	15973	14289	14289	3.77e-22	1.12e-21	30262	5869	6424	6424	5399	5399	4.37e-21	2.44e-21	2.44707e-39	8.07e-39	1	1	0.16073	-0.25078	0.16073	0.41151	28.0879
CG30281	317	317	118	118	4.08e-22	1.21e-21	435	75	26	26	69	69	1.18e-05	3.3e-06	1	0.246323	1	0	1.4257	1.40808	1.4257	0.0176112	98.7798
CG1511	811	811	1249	1249	4.26e-22	1.26e-21	2060	664	696	696	611	611	0.0201177	0.00429137	2.78321e-05	1.47e-05	1	1	-0.623	-0.187915	0.623	0.435085	58.88
CG7409	5713	5713	6794	6794	4.33e-22	1.28e-21	12507	2020	3238	3238	1859	1859	5.03e-84	9.51e-84	2.61139e-29	6.1e-29	1	1	-0.250013	-0.800576	0.250013	0.550564	31.2291
CG11328	1399	1399	933	933	4.41e-22	1.3e-21	2332	808	509	509	744	744	3.37e-11	1.28e-11	0.721125	0.18909	1	0	0.584447	0.547637	0.584447	0.03681	94.0749
CG9153	1800	1800	1266	1266	4.91e-22	1.45e-21	3066	1267	895	895	1166	1166	2.59e-09	9.01e-10	0.133684	0.0420467	1	0	0.50772	0.381608	0.50772	0.126111	80.1033
CG14457	170	170	36	36	5.1e-22	1.5e-21	206	57	23	23	53	53	0.000764582	0.000186102	0.0310107	0.0108955	1	0	2.23947	1.20436	2.23947	1.03511	68.3895
CG17919	1783	1783	1252	1252	5.16e-22	1.52e-21	3035	572	557	557	527	527	0.378428	0.0684791	9.15142e-09	6.85e-09	1	1	0.510072	-0.0798744	0.510072	0.589947	46.3694
CG31795	620	620	325	325	5.27e-22	1.55e-21	945	156	167	167	144	144	0.212144	0.0399513	2.14859e-09	1.69e-09	1	1	0.931828	-0.213779	0.931828	1.14561	44.8547
CG8557	2141	2141	1555	1555	5.28e-22	1.56e-21	3696	918	659	659	845	845	1.79e-06	5.29e-07	0.252584	0.0748681	1	0	0.46137	0.358673	0.46137	0.102697	81.7934
CG5455	2542	2542	3277	3277	5.7e-22	1.68e-21	5819	845	1688	1688	778	778	1.36e-76	2.35e-76	2.73278e-25	5.48e-25	1	1	-0.366412	-1.11747	0.366412	0.751061	32.7893
CG2151	7090	7090	5988	5988	5.79e-22	1.7e-21	13078	4993	3289	3289	4593	4593	5.54e-49	6.14e-49	1.01475e-08	7.56e-09	1	1	0.243711	0.481788	0.243711	0.238076	50.5848
CG7172	986	986	603	603	5.99e-22	1.76e-21	1589	509	371	371	469	469	0.00080747	0.000196163	0.0030864	0.00126785	1	1	0.70943	0.338169	0.70943	0.371261	65.646
CG1448	1666	1666	1155	1155	6.07e-22	1.78e-21	2821	668	517	517	615	615	0.00391934	0.00089684	0.00680695	0.00266636	1	1	0.528496	0.250422	0.528496	0.278073	65.5239
CG31269	99	99	7	7	6.45e-22	1.89e-21	106	51	4	4	47	47	2.42e-10	8.87e-11	0.748871	0.195322	1	0	3.822	3.55459	3.822	0.267413	93.4609
CG6948	2127	2127	2802	2802	6.9e-22	2.02e-21	4929	1371	1227	1227	1262	1262	0.495562	0.0879224	7.79995e-10	6.35e-10	1	1	-0.397637	0.0405767	0.397637	0.438214	47.5727
CG14808	252	252	80	80	7.07e-22	2.07e-21	332	70	51	51	65	65	0.227275	0.0426297	8.33492e-05	4.17e-05	1	1	1.65535	0.349942	1.65535	1.30541	55.9097
CG5630	1294	1294	850	850	7.88e-22	2.3e-21	2144	432	432	432	398	398	0.252009	0.0469368	1.20383e-09	9.67e-10	1	1	0.606303	-0.118263	0.606303	0.724566	45.5569
CG6393	853	853	501	501	8.55e-22	2.5e-21	1354	768	335	335	707	707	3.28e-31	2.47e-31	0.0137688	0.00515017	1	0	0.767735	1.07755	0.767735	0.309814	71.2483
CG5008	2018	2018	2675	2675	8.69e-22	2.54e-21	4693	308	1033	1033	284	284	3.95e-100	9.11e-100	4.51713e-48	1.93e-47	1	1	-0.406613	-1.86288	0.406613	1.45626	21.8271
CG1773	614	614	322	322	8.79e-22	2.57e-21	936	125	128	128	115	115	0.441483	0.0789588	2.74361e-07	1.79e-07	1	1	0.931178	-0.15451	0.931178	1.08569	46.1696
CG8548	1451	1451	979	979	9.27e-22	2.7e-21	2430	1615	588	588	1486	1486	3.3e-89	6.71e-89	4.69851e-17	6.18e-17	1	1	0.567667	1.33755	0.567667	0.769879	42.4409
CG18096	12	12	113	113	9.25e-22	2.7e-21	125	100	12	12	92	92	1.95e-16	9.29e-17	2.11365e-36	6.29e-36	1	1	-3.23522	2.9386	3.23522	6.17382	34.3842
CG3595	2102	2102	1525	1525	9.31e-22	2.71e-21	3627	1231	829	829	1133	1133	7.18e-12	2.83e-12	0.887184	0.22534	1	0	0.462953	0.450704	0.462953	0.0122496	97.4222
CG6859	1004	1004	619	619	1e-21	2.92e-21	1623	635	353	353	585	585	3.44e-14	1.5e-14	0.832661	0.213546	1	0	0.697748	0.728768	0.697748	0.0310205	95.7434
CG11454	329	329	127	127	1.02e-21	2.96e-21	456	212	65	65	195	195	2.88e-16	1.36e-16	0.430679	0.120581	1	0	1.37326	1.58496	1.37326	0.211703	86.643
CG7998	43366	43366	46229	46229	1.15e-21	3.35e-21	89595	14641	18260	18260	13467	13467	5.04e-160	1.9e-159	8.47886e-75	6.03e-74	1	1	-0.0922338	-0.439258	0.0922338	0.347024	20.9976
CG2025	645	645	1036	1036	1.23e-21	3.58e-21	1681	934	737	737	860	860	0.00225668	0.000527702	6.25952e-19	9.14e-19	1	1	-0.683653	0.222672	0.683653	0.906325	42.9976
CG33514	811	811	1243	1243	1.36e-21	3.95e-21	2054	253	538	538	233	233	1.29e-28	9.01e-29	5.22195e-06	2.98e-06	1	1	-0.616052	-1.20728	0.616052	0.591224	51.0283
CG9619	3217	3217	2496	2496	1.45e-21	4.21e-21	5713	1038	1367	1367	955	955	1.22e-17	6.06e-18	4.8574e-35	1.38e-34	1	1	0.366098	-0.517441	0.366098	0.883539	29.2964
CG15434	466	466	805	805	1.46e-21	4.24e-21	1271	144	223	223	133	133	2.13e-06	6.26e-07	0.804009	0.207281	1	0	-0.788659	-0.745617	0.788659	0.0430414	94.8249
CG3308	1587	1587	1094	1094	1.59e-21	4.61e-21	2681	748	798	798	689	689	0.00508204	0.00114786	1.60761e-15	1.93e-15	1	1	0.536689	-0.211885	0.536689	0.748574	41.7571
CG32695	379	379	160	160	1.66e-21	4.79e-21	539	86	84	84	80	80	0.814871	0.138529	8.91533e-07	5.54e-07	1	1	1.24413	-0.0703893	1.24413	1.31452	48.6245
CG8927	1253	1253	1776	1776	1.94e-21	5.61e-21	3029	278	361	361	256	256	2.71e-05	7.35e-06	0.964252	0.243079	1	0	-0.503245	-0.495855	0.503245	0.00739014	98.5528
CG11699	1040	1040	650	650	2.01e-21	5.8e-21	1690	582	251	251	536	536	1.34e-24	8.35e-25	0.00168154	0.000715912	1	1	0.678072	1.09455	0.678072	0.416474	61.9501
CG10146	75	75	0	1	2.04e-21	5.89e-21	76	1304	0	1	1200	1200	0	0	0.115531	0.0367421	1	0	6.22882	10.2288	6.22882	4	60.8948
CG5541	1536	1536	1053	1053	2.09e-21	6.04e-21	2589	923	491	491	849	849	1.01e-22	5.93e-23	0.0144592	0.00539362	1	0	0.544673	0.790042	0.544673	0.245369	68.9423
CG8680	2931	2931	3705	3705	2.1e-21	6.06e-21	6636	990	1401	1401	911	911	1.83e-24	1.13e-24	6.96494e-05	3.52e-05	1	1	-0.338081	-0.620934	0.338081	0.282853	54.4471
CG9116	122	122	16	16	2.21e-21	6.35e-21	138	87	1	1	81	81	3.43e-23	2.04e-23	0.00378136	0.0015356	1	1	2.93074	6.33985	2.93074	3.40911	46.2272
CG8250	1215	1215	791	791	2.55e-21	7.35e-21	2006	356	460	460	328	328	2.91e-06	8.49e-07	1.53739e-19	2.33e-19	1	1	0.619207	-0.487938	0.619207	1.10714	35.8679
CG31000	567	567	291	291	2.77e-21	7.98e-21	858	704	181	181	648	648	2.27e-62	3.18e-62	3.91948e-08	2.78e-08	1	1	0.96233	1.84	0.96233	0.877675	52.3004
CG12261	1401	1401	943	943	2.82e-21	8.1e-21	2344	1045	474	474	962	962	1.6e-38	1.43e-38	9.28434e-06	5.16e-06	1	1	0.571127	1.02115	0.571127	0.450023	55.9298
CG11981	2628	2628	1986	1986	3.33e-21	9.57e-21	4614	1745	920	920	1606	1606	8.29e-43	8.07e-43	5.21679e-08	3.65e-08	1	1	0.4041	0.803766	0.4041	0.399666	50.2758
CG6687	779	779	449	449	3.54e-21	1.02e-20	1228	490	138	138	451	451	1e-39	9.19e-40	1.65967e-08	1.21e-08	1	1	0.794908	1.70846	0.794908	0.913551	46.5278
CG17469	816	816	1244	1244	3.67e-21	1.05e-20	2060	1375	781	781	1265	1265	7.5e-27	5e-27	2.60918e-46	1.06e-45	1	1	-0.608345	0.695743	0.608345	1.30409	31.81
CG6908	2067	2067	1503	1503	3.65e-21	1.05e-20	3570	654	1014	1014	602	602	8.68e-25	5.43e-25	2.28296e-43	8.52e-43	1	1	0.459693	-0.752222	0.459693	1.21192	27.5001
CG11414	1570	1570	1084	1084	3.71e-21	1.06e-20	2654	1282	713	713	1180	1180	5.02e-27	3.36e-27	0.0312903	0.0109827	1	0	0.5344	0.726813	0.5344	0.192413	73.5265
CG7560	565	565	929	929	3.8e-21	1.09e-20	1494	47	467	467	44	44	2.73e-90	5.6e-90	8.78186e-41	3.01e-40	1	1	-0.717428	-3.40785	0.717428	2.69042	21.0522
CG1857	5672	5672	4710	4710	3.79e-21	1.09e-20	10382	1238	2432	2432	1139	1139	5.26e-106	1.27e-105	9.1352e-124	1.08e-122	1	1	0.26813	-1.09438	0.26813	1.36251	16.4433
CG32562	181	181	408	408	4.04e-21	1.15e-20	589	328	250	250	302	302	0.0298614	0.0062633	2.52439e-16	3.17e-16	1	1	-1.17258	0.27262	1.17258	1.4452	44.7929
CG34227	4727	4727	5690	5690	4.02e-21	1.15e-20	10417	501	2879	2879	461	461	0	0	2.5297e-262	8.06e-261	1	1	-0.267504	-2.64273	0.267504	2.37523	10.1223
CG10341	465	465	220	220	4.3e-21	1.23e-20	685	711	183	183	654	654	8.1e-63	1.15e-62	8.68847e-06	4.84e-06	1	1	1.07973	1.83745	1.07973	0.75772	58.7624
CG13057	9518	9518	10864	10864	4.32e-21	1.23e-20	20382	3443	7221	7221	3167	3167	4.940656e-324	4.446591e-323	1.8112e-167	3.22e-166	1	1	-0.190825	-1.18908	0.190825	0.998257	16.0481
CG7109	4504	4504	5444	5444	4.45e-21	1.27e-20	9948	2837	2804	2804	2610	2610	0.00870987	0.00192363	0.00051685	0.000235485	1	1	-0.27346	-0.103437	0.27346	0.170024	61.6618
CG2968	9190	9190	7956	7956	4.5e-21	1.28e-20	17146	3932	3831	3831	3617	3617	0.0135785	0.00294856	4.09321e-13	4.28e-13	1	1	0.208022	-0.0829274	0.208022	0.290949	41.6901
CG10680	2530	2530	1903	1903	4.61e-21	1.31e-20	4433	669	1073	1073	616	616	6.1e-29	4.32e-29	1.96935e-47	8.21e-47	1	1	0.410862	-0.800648	0.410862	1.21151	25.3248
CG5903	6342	6342	7448	7448	4.74e-21	1.35e-20	13790	2768	3666	3666	2547	2547	6.66e-46	6.94e-46	4.63106e-11	4.15e-11	1	1	-0.231915	-0.525408	0.231915	0.293493	44.14
CG17970	215	215	457	457	5.45e-21	1.55e-20	672	48	371	371	45	45	6.87e-65	1.01e-64	1.73712e-16	2.2e-16	1	1	-1.08786	-3.04342	1.08786	1.95556	35.7445
CG10228	1692	1692	1188	1188	5.63e-21	1.6e-20	2880	1266	761	761	1165	1165	3.07e-20	1.68e-20	0.230691	0.0690039	1	0	0.510195	0.614362	0.510195	0.104167	83.0447
CG9616	107	107	11	11	6.4e-21	1.82e-20	118	42	6	6	39	39	5.42e-07	1.66e-07	0.566539	0.152883	1	0	3.28204	2.70044	3.28204	0.581596	84.9469
CG6343	19604	19604	17789	17789	6.43e-21	1.82e-20	37393	7005	7756	7756	6444	6444	3.44e-28	2.38e-28	2.10544e-46	8.59e-46	1	1	0.140163	-0.267356	0.140163	0.407519	25.592
CG11897	2783	2783	2127	2127	7.87e-21	2.23e-20	4910	5526	1425	1425	5083	5083	0	0	6.1579e-132	8e-131	1	1	0.387821	1.83472	0.387821	1.4469	21.1379
CG4797	925	925	1373	1373	8.43e-21	2.39e-20	2298	312	672	672	287	287	2.9e-36	2.47e-36	2.45886e-08	1.77e-08	1	1	-0.569806	-1.22741	0.569806	0.657604	46.4235
CG10844	9197	9197	7971	7971	8.51e-21	2.41e-20	17168	2585	4751	4751	2378	2378	5.8e-177	2.47e-176	2.4107e-184	4.97e-183	1	1	0.206403	-0.998482	0.206403	1.20489	14.6251
CG11447	380	380	164	164	9.29e-21	2.63e-20	544	199	100	100	184	184	7.06e-07	2.15e-07	0.157326	0.0487644	1	0	1.2123	0.879706	1.2123	0.332598	78.4713
CG1667	235	235	484	484	9.31e-21	2.63e-20	719	229	259	259	211	211	0.0300542	0.00630294	2.35442e-05	1.26e-05	1	1	-1.04235	-0.295709	1.04235	0.746637	58.2647
CG3621	2416	2416	1809	1809	9.73e-21	2.75e-20	4225	1061	913	913	976	976	0.153702	0.0295034	6.797e-05	3.44e-05	1	1	0.417428	0.0962663	0.417428	0.321162	56.5169
CG6884	212	212	61	61	1.03e-20	2.9e-20	273	181	37	37	167	167	6.38e-21	3.55e-21	0.30279	0.0880903	1	0	1.79718	2.17425	1.79718	0.377068	82.6576
CG3999	2117	2117	1552	1552	1.06e-20	3e-20	3669	299	457	457	276	276	2.36e-11	9.08e-12	2.76188e-23	5.05e-23	1	1	0.447893	-0.727526	0.447893	1.17542	27.5913
CG8630	2320	2320	3000	3000	1.14e-20	3.22e-20	5320	170	327	327	157	157	8.35e-15	3.73e-15	1.87059e-06	1.12e-06	1	1	-0.370838	-1.05853	0.370838	0.687688	35.0334
CG4267	783	783	456	456	1.21e-20	3.41e-20	1239	314	161	161	289	289	1.67e-09	5.89e-10	0.731738	0.191545	1	0	0.779978	0.844009	0.779978	0.0640303	92.4135
CG1830	3130	3130	2435	2435	1.22e-20	3.43e-20	5565	1482	1439	1439	1364	1364	0.162185	0.0310484	5.64106e-11	5.04e-11	1	1	0.362241	-0.0772229	0.362241	0.439464	45.1838
CG5855	705	705	397	397	1.29e-20	3.63e-20	1102	468	148	148	431	431	4.99e-33	3.93e-33	1.14228e-05	6.29e-06	1	1	0.828484	1.54209	0.828484	0.713606	53.7247
CG5700	379	379	681	681	1.3e-20	3.65e-20	1060	61	106	106	57	57	0.000153263	3.94e-05	0.861123	0.219721	1	0	-0.845457	-0.89503	0.845457	0.0495735	94.4613
CG8923	32	32	155	155	1.46e-20	4.09e-20	187	286	192	192	264	264	0.000865213	0.000209447	2.65977e-22	4.66e-22	1	1	-2.27612	0.459432	2.27612	2.73556	45.4164
CG30288	8	8	97	97	1.5e-20	4.19e-20	105	0	40	40	0	1	3.82e-11	1.45e-11	0.44546	0.124224	1	0	-3.59991	-5.32193	3.59991	1.72202	67.643
CG3764	1173	1173	765	765	1.71e-20	4.78e-20	1938	655	379	379	603	603	8.88e-13	3.63e-13	0.659076	0.174723	1	0	0.616671	0.66996	0.616671	0.0532888	92.046
CG8317	1629	1629	1141	1141	1.74e-20	4.88e-20	2770	780	558	558	718	718	8.33e-06	2.35e-06	0.131587	0.0414298	1	0	0.513688	0.363719	0.513688	0.149969	77.4026
CG1031	1831	1831	2437	2437	1.76e-20	4.92e-20	4268	1270	859	859	1169	1169	6.21e-12	2.46e-12	7.82988e-28	1.74e-27	1	1	-0.412474	0.444545	0.412474	0.857019	32.4913
CG12976	147	147	352	352	1.93e-20	5.39e-20	499	69	80	80	64	64	0.211153	0.0397691	0.00120445	0.000522858	1	1	-1.25976	-0.321928	1.25976	0.937831	57.3246
CG4872	338	338	138	138	2.02e-20	5.64e-20	476	130	31	31	120	120	1.47e-13	6.24e-14	0.045478	0.0155512	1	0	1.29235	1.95269	1.29235	0.660339	66.1832
CG7478	149676	149676	144652	144652	2.07e-20	5.77e-20	294328	34425	69794	69794	31665	31665	9.881313e-324	8.399116e-323	0	0	1	1	0.0492566	-1.14021	0.0492566	1.18947	3.97639
CG12072	1178	1178	770	770	2.14e-20	5.97e-20	1948	759	508	508	699	699	4.26e-08	1.39e-08	0.156438	0.0485208	1	0	0.613409	0.460464	0.613409	0.152945	80.0425
CG5582	1883	1883	1357	1357	2.39e-20	6.66e-20	3240	586	763	763	540	540	7.06e-10	2.54e-10	2.90302e-24	5.55e-24	1	1	0.472612	-0.498724	0.472612	0.971336	32.7306
CG10592	1590	1590	1110	1110	2.41e-20	6.71e-20	2700	1103	819	819	1015	1015	5.18e-06	1.48e-06	0.0184641	0.00675814	1	0	0.518467	0.309544	0.518467	0.208923	71.2778
CG33935	33	33	156	156	2.53e-20	7.04e-20	189	295	201	201	272	272	0.00126434	0.000301885	6.68612e-22	1.15e-21	1	1	-2.24101	0.436411	2.24101	2.67742	45.5635
CG31530	1698	1698	1201	1201	2.59e-20	7.22e-20	2899	468	715	715	431	431	4.37e-17	2.13e-17	1.91268e-33	5.14e-33	1	1	0.4996	-0.730255	0.4996	1.22986	28.8877
CG8612	302	302	574	574	2.68e-20	7.46e-20	876	260	283	283	240	240	0.0661764	0.0133027	2.65269e-05	1.41e-05	1	1	-0.926502	-0.237768	0.926502	0.688735	57.3601
CG7816	1130	1130	1612	1612	3.29e-20	9.13e-20	2742	814	804	804	749	749	0.170581	0.0325267	9.88909e-06	5.49e-06	1	1	-0.512529	-0.10223	0.512529	0.410299	55.5389
CG9165	2666	2666	3382	3382	3.43e-20	9.53e-20	6048	2015	1281	1281	1854	1854	1.25e-24	7.81e-25	9.97967e-43	3.62e-42	1	1	-0.3432	0.533371	0.3432	0.876571	28.1364
CG2864	253	253	505	505	3.5e-20	9.71e-20	758	371	278	278	342	342	0.0113419	0.00248224	4.67879e-16	5.81e-16	1	1	-0.997146	0.298911	0.997146	1.29606	43.4827
CG11172	1184	1184	777	777	3.54e-20	9.82e-20	1961	678	431	431	624	624	3.08e-09	1.07e-09	0.533059	0.145076	1	0	0.607683	0.533858	0.607683	0.0738244	89.1675
CG11665	997	997	1452	1452	3.57e-20	9.89e-20	2449	1118	753	753	1029	1029	6.7e-11	2.52e-11	5.72891e-28	1.28e-27	1	1	-0.542376	0.450521	0.542376	0.992897	35.3277
CG15067	9249	9249	8039	8039	3.62e-20	1e-19	17288	1866	3621	3621	1717	1717	7.54e-153	2.71e-152	1.0413e-166	1.83e-165	1	1	0.202281	-1.0765	0.202281	1.27878	13.6579
CG6901	200	200	56	56	3.65e-20	1.01e-19	256	127	62	62	117	117	4.79e-05	1.27e-05	0.00428343	0.00172777	1	1	1.8365	0.916168	1.8365	0.920333	66.6163
CG8157	316	316	125	125	3.71e-20	1.03e-19	441	67	54	54	62	62	0.515913	0.0912276	0.000318712	0.000149626	1	1	1.338	0.199309	1.338	1.13869	54.0237
CG17766	1944	1944	1412	1412	4.11e-20	1.14e-19	3356	1191	902	902	1096	1096	1.55e-05	4.29e-06	0.0301787	0.010626	1	0	0.461288	0.281048	0.461288	0.18024	71.9046
CG3747	4376	4376	3558	3558	4.3e-20	1.19e-19	7934	1350	2193	2193	1242	1242	7.72e-60	1.05e-59	5.9096e-78	4.32e-77	1	1	0.298546	-0.820241	0.298546	1.11879	21.0639
CG17264	64	64	214	214	4.58e-20	1.26e-19	278	48	79	79	45	45	0.00288824	0.000668856	0.00741222	0.00289008	1	1	-1.74147	-0.811928	1.74147	0.929539	65.1989
CG8184	2594	2594	3298	3298	4.76e-20	1.31e-19	5892	1895	1840	1840	1744	1744	0.112531	0.0219964	1.18655e-05	6.53e-06	1	1	-0.346413	-0.0773057	0.346413	0.269107	56.2797
CG9894	2247	2247	1673	1673	4.81e-20	1.33e-19	3920	1190	843	843	1095	1095	1.13e-08	3.81e-09	0.555924	0.150498	1	0	0.425563	0.377326	0.425563	0.0482363	89.8192
CG11353	114	114	15	15	5.05e-20	1.39e-19	129	82	26	26	76	76	7.44e-07	2.26e-07	0.00880696	0.00340095	1	1	2.926	1.54749	2.926	1.37851	67.9752
CG3362	1034	1034	1494	1494	5.48e-20	1.51e-19	2528	539	726	726	496	496	5.04e-11	1.9e-11	0.859404	0.219361	1	0	-0.530944	-0.549629	0.530944	0.0186855	96.6004
CG4259	318	318	593	593	5.8e-20	1.6e-19	911	146	179	179	135	135	0.0151072	0.00326626	0.0120924	0.00456343	1	1	-0.899005	-0.407	0.899005	0.492005	64.6297
CG10031	316	316	590	590	6.25e-20	1.72e-19	906	120	325	325	111	111	1.98e-25	1.26e-25	0.000567983	0.000257492	1	1	-0.90079	-1.54988	0.90079	0.64909	58.12
CG8302	1054	1054	1517	1517	6.48e-20	1.78e-19	2571	138	873	873	127	127	1.69e-137	5.31e-137	5.51657e-65	3.31e-64	1	1	-0.525346	-2.78115	0.525346	2.25581	18.8895
CG4163	16	16	116	116	6.69e-20	1.84e-19	132	11	51	51	11	11	2.78e-07	8.69e-08	0.373446	0.106033	1	0	-2.85798	-2.21299	2.85798	0.644987	81.5874
CG2993	380	380	168	168	6.86e-20	1.88e-19	548	218	163	163	201	201	0.0523121	0.0106487	1.73457e-05	9.39e-06	1	1	1.17754	0.302324	1.17754	0.875215	57.3639
CG9025	2706	2706	2075	2075	7.21e-20	1.98e-19	4781	836	524	524	769	769	1.01e-11	3.93e-12	0.0661731	0.0220205	1	0	0.383051	0.553417	0.383051	0.170366	69.2156
CG3666	748	748	435	435	7.21e-20	1.98e-19	1183	158	180	180	146	146	0.06743	0.0135431	2.75556e-09	2.14e-09	1	1	0.782023	-0.302029	0.782023	1.08405	41.9074
CG31777	349	349	634	634	7.35e-20	2.01e-19	983	92	318	318	85	85	9.38e-33	7.35e-33	1.06538e-07	7.24e-08	1	1	-0.861256	-1.90349	0.861256	1.04224	45.2461
CG14688	2486	2486	1883	1883	7.38e-20	2.02e-19	4369	866	581	581	797	797	6.5e-09	2.22e-09	0.553174	0.149854	1	0	0.400793	0.456042	0.400793	0.0552483	87.8853
CG2467	3651	3651	2912	2912	7.56e-20	2.07e-19	6563	924	1252	1252	850	850	1.74e-18	8.97e-19	7.23528e-34	1.98e-33	1	1	0.326281	-0.5587	0.326281	0.884981	26.9373
CG8983	5612	5612	6620	6620	8.23e-20	2.25e-19	12232	4042	3187	3187	3718	3718	1.76e-10	6.49e-11	3.81349e-26	7.87e-26	1	1	-0.238316	0.222328	0.238316	0.460644	34.0958
CG5753	2378	2378	1790	1790	8.45e-20	2.31e-19	4168	1664	1004	1004	1531	1531	1.01e-25	6.52e-26	0.00731884	0.00285639	1	1	0.409789	0.608715	0.409789	0.198926	67.3204
CG9559	851	851	1270	1270	8.57e-20	2.34e-19	2121	1083	736	736	997	997	3.92e-10	1.43e-10	5.61268e-27	1.19e-26	1	1	-0.577597	0.437888	0.577597	1.01549	36.2566
CG18143	1492	1492	2032	2032	9.26e-20	2.52e-19	3524	701	502	502	645	645	2.69e-05	7.3e-06	2.91628e-16	3.65e-16	1	1	-0.445653	0.361612	0.445653	0.807265	35.5692
CG2698	1300	1300	876	876	9.32e-20	2.54e-19	2176	827	528	528	761	761	9.22e-11	3.45e-11	0.693817	0.182926	1	0	0.569509	0.527359	0.569509	0.0421503	93.1089
CG17544	1149	1149	753	753	9.92e-20	2.7e-19	1902	1028	394	394	946	946	1.08e-52	1.3e-52	2.30023e-09	1.8e-09	1	1	0.609657	1.26364	0.609657	0.653988	48.2459
CG2918	4702	4702	5626	5626	1.01e-19	2.74e-19	10328	3120	2754	2754	2870	2870	0.125153	0.0243102	3.15122e-11	2.86e-11	1	1	-0.258835	0.0595222	0.258835	0.318357	44.8438
CG8221	1259	1259	843	843	1.07e-19	2.92e-19	2102	45	615	615	42	42	1.46e-131	4.41e-131	8.3135e-148	1.28e-146	1	1	0.578674	-3.87213	0.578674	4.4508	11.5057
CG10686	2681	2681	2056	2056	1.09e-19	2.97e-19	4737	13065	2685	2685	12018	12018	4.940656e-324	4.446591e-323	5.4147e-249	1.62e-247	1	1	0.382931	2.1622	0.382931	1.77927	17.7102
CG1124	1134	1134	1609	1609	1.16e-19	3.15e-19	2743	395	649	649	364	364	2.65e-19	1.41e-19	0.00267048	0.00110719	1	1	-0.504744	-0.83428	0.504744	0.329536	60.5005
CG16723	69	69	0	1	1.2e-19	3.26e-19	70	24	0	1	23	23	2.98e-06	8.67e-07	0.447495	0.124692	1	0	6.10852	4.52356	6.10852	1.58496	79.3986
CG9354	7116	7116	6074	6074	1.2e-19	3.26e-19	13190	5731	3272	3272	5272	5272	1.15e-104	2.74e-104	1.35827e-29	3.21e-29	1	1	0.22842	0.688178	0.22842	0.459758	33.192
CG17531	1509	1509	2050	2050	1.2e-19	3.26e-19	3559	610	3220	3220	562	562	0	0	4.4876e-155	7.25e-154	1	1	-0.442031	-2.51842	0.442031	2.07639	17.5519
CG1250	3323	3323	2624	2624	1.29e-19	3.48e-19	5947	2075	1231	1231	1909	1909	7.43e-34	5.99e-34	6.51438e-06	3.69e-06	1	1	0.340719	0.632986	0.340719	0.292268	53.8272
CG8665	3199	3199	3966	3966	1.33e-19	3.59e-19	7165	1199	2705	2705	1103	1103	4.79e-153	1.73e-152	7.59264e-59	4.02e-58	1	1	-0.310064	-1.2942	0.310064	0.984132	23.958
CG31999	840	840	1254	1254	1.37e-19	3.7e-19	2094	479	726	726	441	441	6.55e-17	3.18e-17	0.20352	0.0616272	1	0	-0.578076	-0.719191	0.578076	0.141115	80.3787
CG4289	1033	1033	661	661	1.43e-19	3.85e-19	1694	620	388	388	571	571	3.76e-09	1.29e-09	0.482395	0.132819	1	0	0.644118	0.557434	0.644118	0.086684	88.1385
CG8028	1163	1163	766	766	1.46e-19	3.93e-19	1929	202	190	190	186	186	0.877074	0.147774	0.000122469	6.01e-05	1	1	0.602435	-0.0306968	0.602435	0.633132	48.7578
CG16755	13	13	107	107	1.5e-19	4.04e-19	120	9	48	48	9	9	1.52e-07	4.83e-08	0.342499	0.0983605	1	0	-3.04103	-2.41504	3.04103	0.62599	82.9292
CG14641	838	838	507	507	1.51e-19	4.08e-19	1345	697	281	281	642	642	3.24e-33	2.57e-33	0.00038903	0.000180327	1	1	0.724964	1.192	0.724964	0.467039	60.819
CG5730	3522	3522	2803	2803	1.6e-19	4.31e-19	6325	1416	1330	1330	1303	1303	0.612376	0.106724	8.7119e-08	5.96e-08	1	1	0.329423	-0.0295892	0.329423	0.359012	47.851
CG10623	1578	1578	1110	1110	1.72e-19	4.62e-19	2688	1351	600	600	1243	1243	1.35e-51	1.59e-51	2.47488e-09	1.94e-09	1	1	0.507538	1.05079	0.507538	0.543254	48.3005
CG5634	1176	1176	778	778	2.02e-19	5.44e-19	1954	810	323	323	746	746	4.08e-39	3.67e-39	1.42425e-07	9.56e-08	1	1	0.596046	1.20764	0.596046	0.611595	49.3562
CG31241	250	250	87	87	2.09e-19	5.62e-19	337	380	51	51	350	350	6.07e-56	7.75e-56	7.21207e-06	4.06e-06	1	1	1.52284	2.77879	1.52284	1.25594	54.8024
CG14394	185	185	50	50	2.1e-19	5.64e-19	235	57	22	22	53	53	0.000449648	0.000111393	0.159609	0.0494034	1	0	1.88753	1.26849	1.88753	0.619036	75.3034
CG1977	7171	7171	6132	6132	2.17e-19	5.84e-19	13303	2765	3262	3262	2544	2544	4.44e-21	2.48e-21	1.03206e-37	3.22e-37	1	1	0.225817	-0.358658	0.225817	0.584475	27.8686
CG11321	4223	4223	3435	3435	2.23e-19	5.99e-19	7658	1078	1710	1710	992	992	8.83e-44	8.72e-44	2.35628e-61	1.33e-60	1	1	0.297958	-0.785584	0.297958	1.08354	21.5677
CG31992	4546	4546	3727	3727	2.24e-19	6.02e-19	8273	3507	2123	2123	3226	3226	1.17e-51	1.37e-51	6.87203e-10	5.63e-10	1	1	0.286583	0.603642	0.286583	0.317059	47.4756
CG34059	1	1	68	68	2.37e-19	6.35e-19	69	2	50	50	2	2	6.12e-13	2.52e-13	0.576387	0.155318	1	0	-6.08746	-4.64386	6.08746	1.44361	80.8313
CG4300	1121	1121	734	734	2.37e-19	6.35e-19	1855	2029	492	492	1867	1867	1.59e-187	7.24e-187	5.13656e-40	1.72e-39	1	1	0.610934	1.92399	0.610934	1.31306	31.7535
CG1982	19399	19399	21212	21212	2.4e-19	6.43e-19	40611	1622	4545	4545	1492	1492	0	0	1.4369e-260	4.41e-259	1	1	-0.128898	-1.60703	0.128898	1.47813	8.02089
CG11263	23	23	130	130	2.54e-19	6.8e-19	153	172	85	85	159	159	2.5e-06	7.34e-07	7.62841e-24	1.43e-23	1	1	-2.49881	0.903492	2.49881	3.4023	42.3447
CG7834	3866	3866	4698	4698	2.55e-19	6.81e-19	8564	1843	2296	2296	1696	1696	2.13e-21	1.21e-21	0.00547012	0.00217534	1	1	-0.281205	-0.436986	0.281205	0.155781	64.351
CG10106	4561	4561	5461	5461	2.56e-19	6.84e-19	10022	2989	2895	2895	2750	2750	0.0552797	0.0112152	0.000116721	5.74e-05	1	1	-0.259815	-0.0741317	0.259815	0.185683	58.3201
CG17378	133	133	323	323	2.6e-19	6.95e-19	456	77	164	164	71	71	1.2e-09	4.25e-10	0.792082	0.20483	1	0	-1.28011	-1.2078	1.28011	0.072303	94.6538
CG7254	17884	17884	16225	16225	2.73e-19	7.28e-19	34109	4600	6773	6773	4232	4232	1.15e-130	3.46e-130	1.4972e-144	2.17e-143	1	1	0.140451	-0.678455	0.140451	0.818906	14.6401
CG11154	92937	92937	96849	96849	2.76e-19	7.36e-19	189786	35561	50069	50069	32710	32710	9.881313e-324	8.399116e-323	0	0	1	1	-0.0594841	-0.614186	0.0594841	0.554702	9.68503
CG8884	814	814	491	491	3.27e-19	8.71e-19	1305	363	244	244	334	334	0.000208284	5.31e-05	0.065206	0.0217252	1	0	0.729306	0.452967	0.729306	0.276339	72.5212
CG15412	893	893	553	553	3.37e-19	8.96e-19	1446	408	409	409	376	376	0.253385	0.047177	3.42686e-10	2.89e-10	1	1	0.691381	-0.121368	0.691381	0.812749	45.9655
CG6045	4485	4485	3676	3676	3.51e-19	9.33e-19	8161	2005	2290	2290	1845	1845	4.8e-12	1.91e-12	2.25293e-27	4.87e-27	1	1	0.286971	-0.311727	0.286971	0.598698	32.4016
CG33248	212	212	439	439	3.57e-19	9.49e-19	651	145	195	195	134	134	0.000912054	0.00022042	0.0132154	0.00495915	1	1	-1.05016	-0.541241	1.05016	0.508916	67.3578
CG11219	1108	1108	1571	1571	3.62e-19	9.61e-19	2679	349	717	717	322	322	3.48e-35	2.9e-35	4.42471e-09	3.38e-09	1	1	-0.503725	-1.15491	0.503725	0.651187	43.6159
CG12702	14	14	108	108	3.68e-19	9.78e-19	122	125	60	60	115	115	3.9e-05	1.04e-05	8.25786e-22	1.4e-21	1	1	-2.94753	0.938599	2.94753	3.88613	43.1325
CG10171	228	228	461	461	4.48e-19	1.19e-18	689	248	221	221	229	229	0.741454	0.126889	2.64308e-09	2.06e-09	1	1	-1.01573	0.0513012	1.01573	1.06703	48.7684
CG2658	1523	1523	1069	1069	4.65e-19	1.23e-18	2592	1038	594	594	955	955	3.99e-20	2.17e-20	0.0666942	0.0221789	1	0	0.510654	0.685038	0.510654	0.174384	74.5439
CG3690	1721	1721	1236	1236	4.65e-19	1.23e-18	2957	482	244	244	444	444	2.17e-14	9.48e-15	0.00253748	0.00105597	1	1	0.477568	0.863679	0.477568	0.38611	55.2947
CG4608	465	465	231	231	4.8e-19	1.27e-18	696	139	122	122	128	128	0.751902	0.12857	1.82887e-05	9.88e-06	1	1	1.00934	0.0692627	1.00934	0.940075	51.7765
CG11956	1362	1362	935	935	4.92e-19	1.3e-18	2297	771	665	665	710	710	0.235377	0.0440438	6.59894e-06	3.73e-06	1	1	0.542688	0.0944647	0.542688	0.448224	54.7666
CG1644	780	780	466	466	4.91e-19	1.3e-18	1246	553	98	98	509	509	7.04e-68	1.08e-67	7.00676e-22	1.2e-21	1	1	0.743144	2.37681	0.743144	1.63367	31.2664
CG5037	3249	3249	2569	2569	5.02e-19	1.32e-18	5818	1462	1330	1330	1345	1345	0.786638	0.134021	1.93875e-06	1.16e-06	1	1	0.338789	0.0161799	0.338789	0.322609	51.2232
CG18179	164	164	40	40	5.06e-19	1.34e-18	204	423	6	6	390	390	6.49e-107	1.59e-106	1.40612e-14	1.6e-14	1	1	2.03562	6.02237	2.03562	3.98674	33.8011
CG5214	19281	19281	17570	17570	5.13e-19	1.35e-18	36851	7659	7501	7501	7045	7045	0.000161377	4.14e-05	2.09742e-15	2.5e-15	1	1	0.134066	-0.0904832	0.134066	0.224549	37.3843
CG17168	813	813	492	492	5.44e-19	1.43e-18	1305	780	246	246	718	718	3.48e-54	4.3e-54	8.65541e-10	7.02e-10	1	1	0.724597	1.54533	0.724597	0.820728	46.8896
CG9676	661	661	1026	1026	5.75e-19	1.51e-18	1687	390	509	509	359	359	3.99e-07	1.24e-07	0.30606	0.0889585	1	0	-0.634309	-0.503682	0.634309	0.130627	82.9232
CG4501	2478	2478	3145	3145	6.01e-19	1.58e-18	5623	1966	2065	2065	1809	1809	4.16e-05	1.11e-05	0.0118189	0.00446777	1	1	-0.343884	-0.190949	0.343884	0.152934	69.2172
CG9005	5058	5058	5992	5992	6.63e-19	1.75e-18	11050	3287	2370	2370	3024	3024	5.49e-19	2.89e-19	2.9384e-35	8.39e-35	1	1	-0.244471	0.351571	0.244471	0.596042	29.0859
CG13188	468	468	781	781	7.02e-19	1.84e-18	1249	133	228	228	123	123	2.25e-08	7.44e-09	0.41648	0.117006	1	0	-0.738814	-0.890376	0.738814	0.151561	82.9778
CG3348	737	737	434	434	7.01e-19	1.84e-18	1171	220	137	137	203	203	0.000407583	0.00010137	0.280887	0.0823033	1	0	0.76397	0.567304	0.76397	0.196666	79.5275
CG5295	2144	2144	2766	2766	7.05e-19	1.85e-18	4910	1307	1233	1233	1203	1203	0.55683	0.0979777	3.69002e-06	2.14e-06	1	1	-0.367496	-0.0355362	0.367496	0.33196	52.5403
CG12532	2139	2139	1598	1598	8.85e-19	2.32e-18	3737	1522	865	865	1400	1400	1.78e-29	1.28e-29	0.000480557	0.000220084	1	1	0.420669	0.694655	0.420669	0.273986	60.558
CG5789	2166	2166	1622	1622	9.78e-19	2.56e-18	3788	3997	1278	1278	3677	3677	2.95e-265	1.97e-264	1.08748e-62	6.24e-62	1	1	0.417259	1.52464	0.417259	1.10738	27.3677
CG14118	301	301	559	559	1.05e-18	2.74e-18	860	57	64	64	53	53	0.35528	0.0646392	0.0316759	0.011107	1	0	-0.893085	-0.27208	0.893085	0.621005	58.9849
CG18446	101	101	12	12	1.08e-18	2.82e-18	113	193	37	37	178	178	2.58e-23	1.54e-23	0.142081	0.0444545	1	0	3.07325	2.26628	3.07325	0.806969	79.203
CG32062	815	815	496	496	1.08e-18	2.84e-18	1311	490	289	289	451	451	2.82e-09	9.8e-10	0.602943	0.161605	1	0	0.71646	0.642058	0.71646	0.074402	90.5923
CG12405	283	283	110	110	1.11e-18	2.9e-18	393	33	16	16	31	31	0.0399861	0.00827386	0.395992	0.111735	1	0	1.3633	0.954196	1.3633	0.409102	76.9182
CG31901	989	989	634	634	1.12e-18	2.94e-18	1623	302	410	410	278	278	5.47e-07	1.68e-07	1.44521e-19	2.19e-19	1	1	0.641488	-0.560539	0.641488	1.20203	34.797
CG5065	1282	1282	873	873	1.19e-18	3.12e-18	2155	423	508	508	390	390	9.25e-05	2.42e-05	6.15167e-16	7.58e-16	1	1	0.554343	-0.381354	0.554343	0.935697	37.2032
CG8639	3446	3446	4218	4218	1.2e-18	3.14e-18	7664	1837	1410	1410	1690	1690	5.32e-07	1.63e-07	2.7177e-19	4.04e-19	1	1	-0.291636	0.261328	0.291636	0.552964	34.5295
CG32834	3402	3402	2713	2713	1.28e-18	3.34e-18	6115	932	1033	1033	858	858	6.23e-05	1.65e-05	6.6714e-15	7.71e-15	1	1	0.326494	-0.267791	0.326494	0.594285	35.4585
CG4404	805	805	489	489	1.36e-18	3.55e-18	1294	1097	267	267	1010	1010	6.6e-102	1.54e-101	3.88938e-21	6.38e-21	1	1	0.719154	1.91944	0.719154	1.20029	37.4668
CG11448	1195	1195	802	802	1.37e-18	3.56e-18	1997	733	506	506	675	675	9.75e-07	2.94e-07	0.145784	0.0455085	1	0	0.575336	0.41575	0.575336	0.159586	78.2853
CG10964	594	594	938	938	1.37e-18	3.56e-18	1532	395	438	438	364	364	0.00990192	0.00217549	0.00223195	0.000935482	1	1	-0.659125	-0.266992	0.659125	0.392133	62.6987
CG9204	725	725	427	427	1.37e-18	3.58e-18	1152	503	234	234	463	463	2.9e-18	1.48e-18	0.133304	0.0419433	1	0	0.763745	0.984504	0.763745	0.220759	77.5766
CG3117	122	122	301	301	1.5e-18	3.9e-18	423	24	84	84	23	23	2.4e-09	8.37e-10	0.145627	0.0454711	1	0	-1.30288	-1.86876	1.30288	0.565873	69.7193
CG7294	92	92	9	9	1.82e-18	4.73e-18	101	32	5	5	30	30	2.24e-05	6.11e-06	0.351693	0.100613	1	0	3.35364	2.58496	3.35364	0.768674	81.3533
CG18497	4752	4752	3935	3935	1.93e-18	5.01e-18	8687	2857	2022	2022	2628	2628	6.42e-19	3.37e-19	0.0463702	0.0158361	1	0	0.272171	0.378182	0.272171	0.106011	71.9683
CG8827	6206	6206	5268	5268	2.09e-18	5.42e-18	11474	2083	3117	3117	1916	1916	8.74e-65	1.28e-64	1.29423e-80	9.81e-80	1	1	0.236408	-0.702061	0.236408	0.938469	20.122
CG10757	323	323	586	586	2.11e-18	5.47e-18	909	237	238	238	218	218	0.373615	0.067653	1.40032e-05	7.65e-06	1	1	-0.859367	-0.126633	0.859367	0.732733	53.9769
CG10908	394	394	185	185	2.32e-18	6.01e-18	579	175	101	101	161	161	0.000252665	6.4e-05	0.0705788	0.0233758	1	0	1.09067	0.672705	1.09067	0.417965	72.2952
CG11440	890	890	558	558	2.4e-18	6.22e-18	1448	537	254	254	494	494	1.2e-18	6.21e-19	0.0359277	0.0124961	1	0	0.67354	0.959683	0.67354	0.286142	70.1836
CG14591	1285	1285	879	879	2.51e-18	6.5e-18	2164	287	407	407	264	264	3.76e-08	1.23e-08	1.24273e-19	1.89e-19	1	1	0.547833	-0.624491	0.547833	1.17232	31.8479
CG3774	1664	1664	1197	1197	2.52e-18	6.51e-18	2861	695	463	463	640	640	1.09e-07	3.51e-08	0.942752	0.238148	1	0	0.475232	0.46706	0.475232	0.00817257	98.3094
CG14562	280	280	527	527	2.59e-18	6.69e-18	807	330	291	291	304	304	0.62279	0.108319	7.97349e-10	6.49e-10	1	1	-0.912376	0.0630522	0.912376	0.975428	48.33
CG3979	5152	5152	6077	6077	2.67e-18	6.9e-18	11229	2228	2231	2231	2050	2050	0.00593392	0.00133021	0.025555	0.0091289	1	0	-0.238227	-0.122067	0.238227	0.11616	67.2222
CG7402	205	205	422	422	2.93e-18	7.56e-18	627	61	232	232	57	57	3.28e-26	2.14e-26	4.21535e-05	2.18e-05	1	1	-1.04162	-2.02509	1.04162	0.983472	51.4357
CG4067	8124	8124	9273	9273	3.12e-18	8.06e-18	17397	1703	3794	3794	1567	1567	3.21e-209	1.66e-208	1.6993e-116	1.86e-115	1	1	-0.190846	-1.27571	0.190846	1.08487	14.9599
CG11473	1205	1205	814	814	3.13e-18	8.08e-18	2019	365	489	489	336	336	1.12e-07	3.58e-08	3.57174e-20	5.58e-20	1	1	0.565932	-0.541373	0.565932	1.10731	33.8226
CG30174	1761	1761	1281	1281	3.24e-18	8.36e-18	3042	375	647	647	345	345	5.87e-22	3.37e-22	6.65069e-37	2.01e-36	1	1	0.459124	-0.907169	0.459124	1.36629	25.1517
CG15917	945	945	603	603	3.26e-18	8.38e-18	1548	202	228	228	186	186	0.0437702	0.0090047	5.05551e-09	3.85e-09	1	1	0.648156	-0.293731	0.648156	0.941888	40.7634
CG11158	323	323	584	584	3.52e-18	9.06e-18	907	130	287	287	120	120	6.94e-17	3.36e-17	0.0319081	0.0111808	1	0	-0.854434	-1.25802	0.854434	0.403582	67.9192
CG12945	497	497	259	259	3.57e-18	9.17e-18	756	540	145	145	497	497	5.18e-46	5.4e-46	1.56319e-06	9.48e-07	1	1	0.940294	1.77719	0.940294	0.836899	52.9089
CG7384	292	292	542	542	3.71e-18	9.52e-18	834	631	319	319	581	581	1.92e-18	9.87e-19	5.05034e-35	1.43e-34	1	1	-0.892324	0.864982	0.892324	1.75731	33.6773
CG11368	341	341	150	150	3.74e-18	9.61e-18	491	118	32	32	109	109	5.02e-11	1.9e-11	0.0734578	0.0242457	1	0	1.18481	1.76818	1.18481	0.583375	67.0071
CG7789	613	613	345	345	3.85e-18	9.88e-18	958	362	179	179	333	333	9.59e-12	3.76e-12	0.731696	0.191545	1	0	0.829291	0.895563	0.829291	0.0662719	92.6
CG11160	1005	1005	652	652	3.96e-18	1.02e-17	1657	331	336	336	305	305	0.236021	0.0441442	1.63625e-08	1.2e-08	1	1	0.624252	-0.139652	0.624252	0.763904	44.9699
CG5410	1340	1340	1828	1828	4.35e-18	1.11e-17	3168	1101	916	916	1013	1013	0.0288061	0.00605199	1.49962e-12	1.5e-12	1	1	-0.448033	0.145215	0.448033	0.593248	43.0271
CG12655	149	149	339	339	4.43e-18	1.13e-17	488	61	248	248	57	57	1.47e-29	1.06e-29	0.000238877	0.000113822	1	1	-1.18597	-2.12131	1.18597	0.935333	55.9077
CG4443	917	917	582	582	4.61e-18	1.18e-17	1499	517	347	347	476	476	7.81e-06	2.21e-06	0.121287	0.038443	1	0	0.655903	0.456026	0.655903	0.199877	76.6439
CG4421	137	137	29	29	5.48e-18	1.4e-17	166	57	15	15	53	53	4.12e-06	1.19e-06	0.462083	0.128175	1	0	2.24005	1.82103	2.24005	0.419021	84.2418
CG2666	4570	4570	3780	3780	5.58e-18	1.43e-17	8350	480	982	982	442	442	2.09e-47	2.24e-47	2.35434e-62	1.34e-61	1	1	0.273808	-1.15168	0.273808	1.42548	16.1131
CG33715	3339	3339	2669	2669	5.63e-18	1.44e-17	6008	940	1077	1077	865	865	1.65e-06	4.88e-07	2.70121e-17	3.62e-17	1	1	0.323117	-0.316246	0.323117	0.639363	33.5713
CG15546	854	854	533	533	6.1e-18	1.56e-17	1387	301	296	296	277	277	0.452103	0.080665	9.32394e-08	6.36e-08	1	1	0.680101	-0.0957112	0.680101	0.775812	46.713
CG9631	1075	1075	1514	1514	6.21e-18	1.58e-17	2589	321	684	684	296	296	5.01e-36	4.25e-36	3.95882e-10	3.32e-10	1	1	-0.494029	-1.2084	0.494029	0.714371	40.8829
CG4428	1679	1679	1215	1215	6.42e-18	1.64e-17	2894	644	440	440	593	593	2.16e-06	6.36e-07	0.741253	0.193726	1	0	0.466646	0.430529	0.466646	0.0361173	92.8162
CG8444	6788	6788	7831	7831	6.6e-18	1.68e-17	14619	3042	4394	4394	2799	2799	1.91e-79	3.42e-79	5.63359e-26	1.16e-25	1	1	-0.20621	-0.650623	0.20621	0.444413	31.6942
CG7778	1968	1968	1463	1463	6.71e-18	1.71e-17	3431	531	645	645	489	489	4.03e-06	1.16e-06	1.00722e-16	1.29e-16	1	1	0.4278	-0.399465	0.4278	0.827265	34.0859
CG33329	318	318	136	136	7.14e-18	1.82e-17	454	109	126	126	101	101	0.110973	0.0217202	1.61246e-10	1.4e-10	1	1	1.22542	-0.319068	1.22542	1.54449	44.2405
CG2121	495	495	805	805	7.26e-18	1.85e-17	1300	156	335	335	144	144	1.36e-18	7.05e-19	0.00180264	0.000765477	1	1	-0.70156	-1.21809	0.70156	0.516532	57.595
CG8331	2886	2886	2268	2268	7.66e-18	1.95e-17	5154	1458	1147	1147	1342	1342	0.000100076	2.61e-05	0.0902943	0.0292929	1	0	0.347651	0.226519	0.347651	0.121131	74.1604
CG16901	1458	1458	1029	1029	7.73e-18	1.96e-17	2487	2379	816	816	2189	2189	2.03e-143	6.67e-143	1.57706e-28	3.58e-28	1	1	0.502748	1.42363	0.502748	0.920883	35.3145
CG10824	490	490	798	798	8.33e-18	2.11e-17	1288	129	434	434	119	119	4.48e-43	4.39e-43	1.77876e-12	1.76e-12	1	1	-0.703607	-1.86673	0.703607	1.16313	37.6919
CG1146	734	734	1102	1102	8.43e-18	2.14e-17	1836	431	646	646	397	397	1.21e-14	5.34e-15	0.321118	0.0927956	1	0	-0.586272	-0.702395	0.586272	0.116123	83.4676
CG8849	1070	1070	708	708	8.64e-18	2.19e-17	1778	542	329	329	499	499	3.79e-09	1.3e-09	1	0.246323	1	0	0.59579	0.600952	0.59579	0.0051627	99.1409
CG7967	1187	1187	804	804	8.9e-18	2.25e-17	1991	668	379	379	615	615	6.96e-14	3e-14	0.249613	0.0741307	1	0	0.562053	0.698389	0.562053	0.136336	80.4785
CG16873	525	525	282	282	9.17e-18	2.32e-17	807	114	59	59	105	105	0.000408176	0.000101487	0.788681	0.204187	1	0	0.896622	0.831602	0.896622	0.0650198	93.2387
CG4007	79	79	227	227	9.67e-18	2.44e-17	306	45	158	158	42	42	5.1e-17	2.48e-17	0.241365	0.0718637	1	0	-1.52277	-1.91146	1.52277	0.388696	79.665
CG13270	79	79	227	227	9.67e-18	2.44e-17	306	37	142	142	35	35	1.73e-16	8.26e-17	0.14866	0.0463061	1	0	-1.52277	-2.02046	1.52277	0.497696	75.3672
CG4094	18083	18083	19752	19752	9.77e-18	2.47e-17	37835	6353	7929	7929	5844	5844	8.21e-71	1.31e-70	2.75378e-27	5.92e-27	1	1	-0.127365	-0.440183	0.127365	0.312818	28.9345
CG15353	98	98	258	258	9.81e-18	2.48e-17	356	44	100	100	41	41	7.24e-07	2.2e-07	0.740275	0.193491	1	0	-1.39652	-1.2863	1.39652	0.110213	92.6853
CG6953	5412	5412	6341	6341	1.09e-17	2.74e-17	11753	850	2973	2973	782	782	4.31e-298	3.24e-297	8.1937e-177	1.56e-175	1	1	-0.228549	-1.92668	0.228549	1.69813	11.8623
CG7437	690	690	407	407	1.11e-17	2.81e-17	1097	428	271	271	394	394	2.1e-06	6.18e-07	0.129978	0.0409442	1	0	0.761568	0.539903	0.761568	0.221665	77.4555
CG6115	2788	2788	2185	2185	1.26e-17	3.18e-17	4973	1137	888	888	1046	1046	0.000354486	8.86e-05	0.138197	0.0433551	1	0	0.351597	0.236251	0.351597	0.115346	75.2976
CG31915	485	485	254	254	1.46e-17	3.67e-17	739	289	113	113	266	266	2.43e-15	1.1e-15	0.138832	0.0435322	1	0	0.933156	1.2351	0.933156	0.301947	75.5529
CG2803	1404	1404	987	987	1.48e-17	3.72e-17	2391	1722	498	498	1584	1584	2.99e-131	9.04e-131	3.80145e-35	1.08e-34	1	1	0.508421	1.66935	0.508421	1.16093	30.4561
CG4710	4361	4361	3600	3600	1.54e-17	3.87e-17	7961	2274	1799	1799	2092	2092	2.82e-06	8.24e-07	0.298037	0.0868207	1	0	0.276662	0.217688	0.276662	0.0589744	82.4291
CG16889	7376	7376	6376	6376	1.56e-17	3.92e-17	13752	1888	2735	2735	1737	1737	1.13e-50	1.29e-50	1.43541e-66	8.88e-66	1	1	0.210187	-0.654943	0.210187	0.86513	19.5465
CG9640	2836	2836	2230	2230	1.74e-17	4.36e-17	5066	982	883	883	904	904	0.636143	0.110466	8.7017e-05	4.35e-05	1	1	0.346814	0.0339093	0.346814	0.312904	52.57
CG15818	1067	1067	1498	1498	1.74e-17	4.36e-17	2565	211	1158	1158	195	195	7.79e-167	3.07e-166	1.39126e-72	9.41e-72	1	1	-0.489477	-2.57009	0.489477	2.08061	19.0452
CG33232	2233	2233	2839	2839	1.82e-17	4.55e-17	5072	1097	1629	1629	1010	1010	1.26e-33	1.01e-33	1.15718e-06	7.11e-07	1	1	-0.3464	-0.689631	0.3464	0.343232	50.2297
CG1558	24	24	124	124	1.89e-17	4.74e-17	148	77	52	52	71	71	0.104204	0.0204466	7.64563e-13	7.82e-13	1	1	-2.36923	0.449307	2.36923	2.81854	45.6696
CG3842	720	720	432	432	1.9e-17	4.75e-17	1152	350	190	190	322	322	5.86e-09	2e-09	0.912602	0.231103	1	0	0.736966	0.761061	0.736966	0.0240957	96.8339
CG8683	1076	1076	1508	1508	1.92e-17	4.82e-17	2584	611	706	706	563	563	6.6e-05	1.74e-05	0.110847	0.0354038	1	0	-0.486958	-0.326533	0.486958	0.160425	75.2195
CG7841	715	715	1074	1074	2.03e-17	5.07e-17	1789	357	327	327	329	329	0.96886	0.161795	7.46017e-06	4.2e-06	1	1	-0.586979	0.00879695	0.586979	0.595776	49.6281
CG3223	915	915	1316	1316	2.05e-17	5.11e-17	2231	316	364	364	291	291	0.00486623	0.00110184	0.125596	0.0396861	1	0	-0.524316	-0.322919	0.524316	0.201397	72.2484
CG4729	1850	1850	2404	2404	2.06e-17	5.14e-17	4254	803	932	932	739	739	2.58e-06	7.55e-07	0.620795	0.165847	1	0	-0.377912	-0.334756	0.377912	0.043156	89.7508
CG10990	1404	1404	989	989	2.17e-17	5.43e-17	2393	2296	937	937	2112	2112	6.79e-103	1.6e-102	5.87285e-16	7.24e-16	1	1	0.505501	1.17249	0.505501	0.666988	43.1135
CG4615	764	764	467	467	2.3e-17	5.74e-17	1231	301	239	239	277	277	0.103256	0.0202703	0.00133345	0.000575901	1	1	0.71015	0.212875	0.71015	0.497275	58.8153
CG00000	1944	1944	1450	1450	2.31e-17	5.76e-17	3394	1431	725	725	1317	1317	1.27e-39	1.16e-39	1.42761e-07	9.58e-08	1	1	0.422975	0.861202	0.422975	0.438227	49.1145
CG15926	513	513	822	822	2.51e-17	6.26e-17	1335	345	458	458	318	318	5.65e-07	1.73e-07	0.248522	0.0738426	1	0	-0.68018	-0.526321	0.68018	0.153859	81.5526
CG3399	722	722	435	435	2.88e-17	7.18e-17	1157	496	324	324	457	457	2.2e-06	6.46e-07	0.0878367	0.0285447	1	0	0.730983	0.4962	0.730983	0.234783	75.6895
CG10157	1770	1770	2310	2310	2.9e-17	7.22e-17	4080	530	949	949	488	488	1.86e-34	1.52e-34	3.44894e-10	2.91e-10	1	1	-0.384143	-0.959527	0.384143	0.575383	40.0347
CG4475	2745	2745	3408	3408	2.98e-17	7.4e-17	6153	1170	1957	1957	1077	1077	3.96e-58	5.27e-58	6.42142e-17	8.35e-17	1	1	-0.312119	-0.861626	0.312119	0.549506	36.2245
CG33080	2490	2490	3123	3123	3.05e-17	7.59e-17	5613	676	1162	1162	622	622	7.46e-38	6.54e-38	1.14841e-12	1.16e-12	1	1	-0.326787	-0.901624	0.326787	0.574837	36.2443
CG17562	1373	1373	965	965	3.22e-17	7.99e-17	2338	281	596	596	259	259	2.39e-31	1.81e-31	1.03879e-46	4.26e-46	1	1	0.508731	-1.20236	0.508731	1.71109	22.9176
CG3936	1075	1075	718	718	3.31e-17	8.22e-17	1793	1175	521	521	1081	1081	3.12e-45	3.17e-45	5.71848e-06	3.26e-06	1	1	0.582281	1.05301	0.582281	0.47073	55.2967
CG9819	1662	1662	1210	1210	3.38e-17	8.38e-17	2872	747	519	519	688	688	1.28e-06	3.81e-07	0.627051	0.16719	1	0	0.457913	0.406674	0.457913	0.0512393	89.9364
CG9765	1873	1873	2426	2426	3.45e-17	8.54e-17	4299	1241	1446	1446	1142	1142	2.48e-09	8.64e-10	0.651832	0.172934	1	0	-0.373229	-0.340505	0.373229	0.0327237	91.939
CG5639	339	339	596	596	3.6e-17	8.93e-17	935	189	321	321	174	174	3.84e-11	1.46e-11	0.685475	0.180901	1	0	-0.814027	-0.883486	0.814027	0.0694589	92.1381
CG17274	87	87	9	9	3.64e-17	9.02e-17	96	49	4	4	46	46	4.46e-10	1.62e-10	1	0.246323	1	0	3.27302	3.52356	3.27302	0.250543	92.8895
CG14567	224	224	440	440	3.82e-17	9.45e-17	664	56	122	122	52	52	1.15e-07	3.68e-08	0.365432	0.104034	1	0	-0.974005	-1.2303	0.974005	0.256293	79.1682
CG15693	8199	8199	9313	9313	3.98e-17	9.85e-17	17512	8757	5452	5452	8055	8055	1.05e-111	2.71e-111	1.3902e-111	1.46e-110	1	1	-0.183798	0.563099	0.183798	0.746897	19.7485
CG1427	366	366	172	172	3.99e-17	9.87e-17	538	402	117	117	370	370	1.27e-31	9.68e-32	0.00539653	0.00214747	1	1	1.08944	1.66102	1.08944	0.571582	65.5884
CG32373	116	116	21	21	4.04e-17	9.97e-17	137	239	6	6	220	220	3.3e-57	4.32e-57	1.44914e-05	7.9e-06	1	1	2.46566	5.1964	2.46566	2.73073	47.4495
CG33978	1615	1615	1171	1171	4.08e-17	1.01e-16	2786	421	599	599	388	388	1.95e-11	7.54e-12	7.48968e-24	1.41e-23	1	1	0.463793	-0.626499	0.463793	1.09029	29.8435
CG8913	2441	2441	3065	3065	4.29e-17	1.06e-16	5506	958	1774	1774	882	882	3.03e-68	4.69e-68	5.83631e-22	1e-21	1	1	-0.328415	-1.00816	0.328415	0.679741	32.5758
CG11378	2523	2523	1960	1960	4.29e-17	1.06e-16	4483	677	911	911	623	623	2e-13	8.43e-14	2.79006e-26	5.78e-26	1	1	0.364287	-0.548219	0.364287	0.912505	28.5314
CG6602	1372	1372	1849	1849	4.38e-17	1.08e-16	3221	366	650	650	337	337	1.3e-23	7.82e-24	2.0807e-06	1.24e-06	1	1	-0.430465	-0.947691	0.430465	0.517226	45.4225
CG4371	141	141	320	320	4.55e-17	1.12e-16	461	61	377	377	57	57	6.06e-59	8.22e-59	2.31021e-10	1.98e-10	1	1	-1.18238	-2.72553	1.18238	1.54315	43.3815
CG13570	173	173	367	367	4.59e-17	1.13e-16	540	277	141	141	255	255	1.08e-08	3.64e-09	6.85249e-23	1.23e-22	1	1	-1.08501	0.854802	1.08501	1.93981	35.8702
CG10805	490	490	790	790	4.64e-17	1.14e-16	1280	2092	1019	1019	1925	1925	1.9e-63	2.72e-63	6.22858e-60	3.38e-59	1	1	-0.689071	0.917704	0.689071	1.60678	30.0138
CG6641	800	800	498	498	4.77e-17	1.17e-16	1298	152	188	188	140	140	0.00935097	0.00205913	7.17322e-10	5.86e-10	1	1	0.683854	-0.425306	0.683854	1.10916	38.1399
CG32513	646	646	378	378	4.8e-17	1.18e-16	1024	453	172	172	417	417	1.87e-24	1.16e-24	0.00186085	0.000788831	1	1	0.773148	1.27764	0.773148	0.504491	60.5138
CG30026	475	475	250	250	5e-17	1.23e-16	725	154	108	108	142	142	0.0366672	0.00761014	0.0149485	0.00556261	1	0	0.925999	0.39486	0.925999	0.53114	63.5491
CG14125	2005	2005	1508	1508	5.19e-17	1.27e-16	3513	1260	1094	1094	1159	1159	0.177536	0.0337941	2.94959e-05	1.56e-05	1	1	0.410966	0.0832678	0.410966	0.327698	55.6364
CG18660	556	556	310	310	5.21e-17	1.28e-16	866	156	152	152	144	144	0.684176	0.117934	3.7325e-06	2.17e-06	1	1	0.842817	-0.0780025	0.842817	0.920819	47.7886
CG11133	0	1	60	60	5.38e-17	1.32e-16	61	399	32	32	368	368	1.66e-73	2.79e-73	2.22122e-50	9.88e-50	1	1	-5.90689	3.52356	5.90689	9.43045	38.5131
CG9629	5265	5265	6160	6160	5.85e-17	1.43e-16	11425	1241	1945	1945	1142	1142	9.39e-48	1.01e-47	1.2948e-19	1.97e-19	1	1	-0.226497	-0.768208	0.226497	0.541711	29.4838
CG1236	1002	1002	661	661	5.94e-17	1.45e-16	1663	517	256	256	476	476	3.46e-16	1.63e-16	0.0285086	0.0100857	1	0	0.60016	0.894818	0.60016	0.294657	67.0707
CG8319	148	148	37	37	6.33e-17	1.55e-16	185	232	47	47	214	214	1.24e-26	8.16e-27	0.624054	0.166483	1	0	2	2.18688	2	0.186878	91.4546
CG3588	768	768	1132	1132	6.65e-17	1.63e-16	1900	290	913	913	267	267	5.14e-83	9.6e-83	7.74905e-25	1.53e-24	1	1	-0.559696	-1.77378	0.559696	1.21408	31.5539
CG7314	264	264	493	493	6.79e-17	1.66e-16	757	103	239	239	95	95	1.85e-15	8.46e-16	0.0425392	0.0146114	1	0	-0.90105	-1.33101	0.90105	0.429961	67.6966
CG3321	9264	9264	8162	8162	7.23e-17	1.77e-16	17426	3512	3645	3645	3231	3231	6.29e-07	1.92e-07	4.46853e-18	6.25e-18	1	1	0.182713	-0.173938	0.182713	0.356651	33.8756
CG8756	8968	8968	10121	10121	7.4e-17	1.81e-16	19089	964	1603	1603	887	887	3.37e-47	3.59e-47	4.79819e-27	1.02e-26	1	1	-0.174494	-0.853768	0.174494	0.679275	20.4381
CG10628	305	305	132	132	7.5e-17	1.83e-16	437	385	46	46	355	355	3.06e-60	4.2e-60	2.36747e-11	2.16e-11	1	1	1.20827	2.94811	1.20827	1.73984	40.9846
CG18345	4569	4569	5402	5402	7.63e-17	1.86e-16	9971	1915	2018	2018	1762	1762	3.34e-05	8.98e-06	0.410018	0.115296	1	0	-0.241615	-0.195712	0.241615	0.0459029	84.0348
CG4944	772	772	1136	1136	7.73e-17	1.88e-16	1908	1271	582	582	1170	1170	1.62e-45	1.66e-45	7.43732e-58	3.87e-57	1	1	-0.55729	1.00742	0.55729	1.56471	26.2625
CG11421	491	491	263	263	8.05e-17	1.96e-16	754	105	183	183	97	97	3.08e-07	9.62e-08	2.38366e-18	3.38e-18	1	1	0.90066	-0.915787	0.90066	1.81645	33.1478
CG3558	1873	1873	1397	1397	8.72e-17	2.12e-16	3270	1254	878	878	1154	1154	9.98e-10	3.56e-10	0.732089	0.191617	1	0	0.423019	0.39435	0.423019	0.0286685	93.653
CG5020	1343	1343	945	945	8.76e-17	2.13e-16	2288	541	559	559	498	498	0.0649141	0.013065	4.1435e-10	3.47e-10	1	1	0.507073	-0.166703	0.507073	0.673776	42.9414
CG16704	745	745	457	457	8.97e-17	2.18e-16	1202	160	360	360	148	148	2.02e-21	1.15e-21	6.08454e-36	1.78e-35	1	1	0.705046	-1.2824	0.705046	1.98745	26.1856
CG4365	1476	1476	1964	1964	9.02e-17	2.19e-16	3440	1076	983	983	990	990	0.892554	0.150089	2.45084e-07	1.61e-07	1	1	-0.412102	0.0102371	0.412102	0.422339	49.3866
CG8226	1578	1578	1144	1144	9.04e-17	2.19e-16	2722	1261	563	563	1160	1160	1.09e-47	1.17e-47	4.34029e-10	3.62e-10	1	1	0.46401	1.04292	0.46401	0.578908	44.4915
CG12001	553	553	866	866	9.1e-17	2.21e-16	1419	250	380	380	230	230	1.34e-09	4.74e-10	0.619048	0.165434	1	0	-0.647088	-0.724366	0.647088	0.077278	89.3316
CG14762	1296	1296	906	906	9.47e-17	2.3e-16	2202	728	893	893	670	670	1.86e-08	6.18e-09	3.47509e-22	6.04e-22	1	1	0.516483	-0.414499	0.516483	0.930982	35.6819
CG8600	620	620	949	949	9.51e-17	2.3e-16	1569	799	485	485	735	735	8.46e-13	3.46e-13	1.38627e-27	3.03e-27	1	1	-0.61414	0.59976	0.61414	1.2139	33.5956
CG2765	5217	5217	6101	6101	1.01e-16	2.43e-16	11318	2381	3439	3439	2191	2191	1.6e-62	2.25e-62	6.5327e-19	9.52e-19	1	1	-0.225825	-0.6504	0.225825	0.424574	34.721
CG9120	59	59	0	1	1.06e-16	2.56e-16	60	46	1	1	43	43	5.12e-12	2.03e-12	1	0.246323	1	0	5.88264	5.42626	5.88264	0.456378	92.8005
CG4456	93	93	12	12	1.1e-16	2.66e-16	105	37	2	2	35	35	1.02e-08	3.45e-09	0.357539	0.102059	1	0	2.9542	4.12928	2.9542	1.17509	71.5426
CG31274	29	29	131	131	1.1e-16	2.66e-16	160	17	29	29	16	16	0.0724543	0.0145008	0.0234157	0.00842353	1	0	-2.17544	-0.857981	2.17544	1.31746	62.2818
CG17221	465	465	754	754	1.16e-16	2.8e-16	1219	261	409	409	241	241	4.51e-11	1.71e-11	0.688655	0.181721	1	0	-0.697334	-0.763068	0.697334	0.0657339	91.3856
CG6907	717	717	436	436	1.16e-16	2.81e-16	1153	652	279	279	600	600	9.5e-28	6.48e-28	0.00489772	0.00196137	1	1	0.717645	1.1047	0.717645	0.387052	64.963
CG5057	447	447	731	731	1.18e-16	2.84e-16	1178	321	398	398	296	296	0.000122903	3.18e-05	0.0451338	0.0154464	1	0	-0.709597	-0.427171	0.709597	0.282425	71.5303
CG3455	3251	3251	2616	2616	1.18e-16	2.84e-16	5867	1833	890	890	1687	1687	2.7e-56	3.48e-56	4.39685e-18	6.15e-18	1	1	0.313521	0.922583	0.313521	0.609062	33.983
CG10377	4288	4288	3554	3554	1.2e-16	2.89e-16	7842	5184	2428	2428	4769	4769	1.62e-170	6.63e-170	8.24047e-48	3.48e-47	1	1	0.270861	0.973918	0.270861	0.703057	27.8115
CG7702	430	430	709	709	1.25e-16	3e-16	1139	230	424	424	212	212	3.03e-17	1.49e-17	0.0639296	0.0213463	1	0	-0.721449	-1	0.721449	0.278551	72.1449
CG14411	1032	1032	1444	1444	1.25e-16	3e-16	2476	1303	941	941	1199	1199	2.67e-08	8.78e-09	2.22426e-22	3.91e-22	1	1	-0.484628	0.349565	0.484628	0.834193	36.7471
CG4364	2747	2747	3395	3395	1.42e-16	3.41e-16	6142	4094	2665	2665	3766	3766	5.06e-43	4.95e-43	1.92963e-54	9.32e-54	1	1	-0.305555	0.498897	0.305555	0.804452	27.5273
CG33056	1107	1107	751	751	1.45e-16	3.48e-16	1858	551	542	542	507	507	0.293823	0.054093	5.36959e-09	4.09e-09	1	1	0.55977	-0.0963071	0.55977	0.656078	46.0395
CG3373	2804	2804	3458	3458	1.46e-16	3.52e-16	6262	2248	1664	1664	2068	2068	4.03e-11	1.53e-11	7.74768e-25	1.53e-24	1	1	-0.302452	0.313581	0.302452	0.616032	32.9294
CG10361	1119	1119	761	761	1.48e-16	3.55e-16	1880	131	109	109	121	121	0.468334	0.0833166	0.0470315	0.01604	1	0	0.556242	0.150679	0.556242	0.405563	57.8331
CG32479	684	684	1025	1025	1.56e-16	3.75e-16	1709	1203	633	633	1107	1107	3.71e-30	2.71e-30	6.11227e-44	2.34e-43	1	1	-0.583556	0.806378	0.583556	1.38993	29.5697
CG17369	18399	18399	20015	20015	1.7e-16	4.09e-16	38414	8913	10503	10503	8199	8199	8.62e-64	1.24e-63	7.07021e-20	1.09e-19	1	1	-0.121454	-0.357282	0.121454	0.235827	33.994
CG15304	5688	5688	6602	6602	1.73e-16	4.15e-16	12290	2313	2567	2567	2128	2128	1.59e-10	5.87e-11	0.270659	0.079668	1	0	-0.214982	-0.270585	0.214982	0.0556035	79.4507
CG1569	44	44	159	159	1.77e-16	4.25e-16	203	467	187	187	430	430	5.42e-23	3.21e-23	1.01491e-33	2.76e-33	1	1	-1.85345	1.2013	1.85345	3.05475	37.7623
CG14695	54	54	177	177	1.84e-16	4.39e-16	231	6	41	41	6	6	1.77e-07	5.61e-08	0.122291	0.0387413	1	0	-1.71272	-2.77259	1.71272	1.05987	61.7732
CG14207	5989	5989	5121	5121	1.88e-16	4.49e-16	11110	1818	2439	2439	1673	1673	5.46e-33	4.29e-33	1.05967e-47	4.44e-47	1	1	0.22589	-0.543852	0.22589	0.769742	22.6881
CG14590	345	345	597	597	1.92e-16	4.59e-16	942	89	214	214	82	82	9.49e-15	4.22e-15	0.00502222	0.00200926	1	1	-0.791135	-1.38391	0.791135	0.59278	57.1664
CG32667	2875	2875	3534	3534	1.93e-16	4.61e-16	6409	363	937	937	334	334	1.6e-66	2.41e-66	6.17394e-36	1.8e-35	1	1	-0.29774	-1.4882	0.29774	1.19046	20.0067
CG7025	375	375	636	636	1.99e-16	4.75e-16	1011	230	394	394	212	212	1.28e-13	5.45e-14	0.422993	0.118551	1	0	-0.762136	-0.894131	0.762136	0.131995	85.2376
CG31664	58	58	0	1	2.08e-16	4.97e-16	59	29	0	1	27	27	2.16e-07	6.8e-08	0.542636	0.147356	1	0	5.85798	4.75489	5.85798	1.10309	84.1534
CG3131	1199	1199	829	829	2.1e-16	5e-16	2028	1419	374	374	1306	1306	8.5e-121	2.38e-120	5.77248e-34	1.58e-33	1	1	0.532388	1.80404	0.532388	1.27166	29.5108
CG10658	1373	1373	975	975	2.17e-16	5.17e-16	2348	307	474	474	283	283	3.87e-12	1.54e-12	4.61843e-24	8.75e-24	1	1	0.493858	-0.744085	0.493858	1.23794	28.517
CG9358	801	801	1165	1165	2.21e-16	5.27e-16	1966	130	409	409	120	120	6.82e-38	5.99e-38	5.43203e-15	6.32e-15	1	1	-0.540456	-1.76907	0.540456	1.22861	30.5503
CG13868	6514	6514	7486	7486	2.22e-16	5.28e-16	14000	2331	3144	3144	2145	2145	4.2e-43	4.12e-43	9.29861e-14	1.01e-13	1	1	-0.200651	-0.551624	0.200651	0.350972	36.3747
CG31674	302	302	539	539	2.57e-16	6.11e-16	841	100	223	223	92	92	1.06e-13	4.51e-14	0.0364686	0.0126663	1	0	-0.835737	-1.27734	0.835737	0.441601	65.428
CG31136	1888	1888	1417	1417	2.63e-16	6.25e-16	3305	780	806	806	718	718	0.0258102	0.00545255	9.96142e-11	8.77e-11	1	1	0.414019	-0.166796	0.414019	0.580815	41.6169
CG8801	5690	5690	6598	6598	2.7e-16	6.42e-16	12288	8138	5325	5325	7486	7486	1.44e-81	2.64e-81	1.34012e-82	1.04e-81	1	1	-0.2136	0.491414	0.2136	0.705014	23.2524
CG33135	391	391	194	194	2.8e-16	6.66e-16	585	121	126	126	112	112	0.399465	0.0719925	1.76555e-07	1.18e-07	1	1	1.01111	-0.169925	1.01111	1.18104	46.1242
CG7722	298	298	130	130	2.86e-16	6.78e-16	428	185	95	95	171	171	3.68e-06	1.07e-06	0.156442	0.0485208	1	0	1.1968	0.847997	1.1968	0.348804	77.4325
CG4735	32	32	135	135	2.96e-16	7.02e-16	167	437	161	161	402	402	8.91e-25	5.57e-25	6.25355e-34	1.71e-33	1	1	-2.07682	1.32013	2.07682	3.39695	37.9413
CG31531	2497	2497	3109	3109	3.12e-16	7.4e-16	5606	1057	1747	1747	973	973	2.3e-50	2.61e-50	2.22423e-14	2.5e-14	1	1	-0.316255	-0.844368	0.316255	0.528113	37.4546
CG5941	498	498	272	272	3.16e-16	7.48e-16	770	481	184	184	443	443	1.36e-25	8.71e-26	0.0187154	0.00684092	1	0	0.872539	1.2676	0.872539	0.395062	68.8339
CG32016	563	563	872	872	3.3e-16	7.8e-16	1435	706	488	488	650	650	1.75e-06	5.18e-07	2.05339e-19	3.07e-19	1	1	-0.631193	0.413559	0.631193	1.04475	37.6619
CG33964	60	60	186	186	3.44e-16	8.14e-16	246	70	152	152	65	65	3.28e-09	1.13e-09	0.208112	0.0628859	1	0	-1.63227	-1.22556	1.63227	0.406709	80.0533
CG13175	60	60	186	186	3.44e-16	8.14e-16	246	70	152	152	65	65	3.28e-09	1.13e-09	0.208112	0.0628859	1	0	-1.63227	-1.22556	1.63227	0.406709	80.0533
CG3590	1641	1641	2143	2143	3.46e-16	8.16e-16	3784	1199	875	875	1103	1103	3.23e-07	1.01e-07	4.22558e-19	6.22e-19	1	1	-0.385057	0.334078	0.385057	0.719134	34.8723
CG7145	5623	5623	4791	4791	3.72e-16	8.78e-16	10414	2489	2542	2542	2290	2290	0.000304305	7.65e-05	3.43412e-14	3.82e-14	1	1	0.231013	-0.150616	0.231013	0.38163	37.7076
CG6760	1293	1293	1742	1742	3.74e-16	8.83e-16	3035	527	433	433	485	485	0.0922723	0.0182339	5.88882e-08	4.1e-08	1	1	-0.430022	0.163618	0.430022	0.59364	42.0082
CG5904	695	695	423	423	3.8e-16	8.95e-16	1118	612	261	261	563	563	2.76e-26	1.8e-26	0.00530358	0.00211322	1	1	0.716355	1.10909	0.716355	0.39273	64.5898
CG5741	380	380	187	187	3.87e-16	9.13e-16	567	341	139	139	314	314	1.23e-16	5.91e-17	0.457583	0.127085	1	0	1.02296	1.17568	1.02296	0.152719	87.0102
CG17525	303	303	134	134	3.97e-16	9.34e-16	437	78	84	84	72	72	0.378537	0.0684838	4.10946e-07	2.63e-07	1	1	1.17708	-0.222392	1.17708	1.39948	45.6843
CG12143	1844	1844	1382	1382	4.29e-16	1.01e-15	3226	386	750	750	356	356	6.76e-33	5.31e-33	3.84185e-47	1.59e-46	1	1	0.416081	-1.07501	0.416081	1.49109	21.8166
CG34215	232	232	442	442	4.81e-16	1.13e-15	674	41	254	254	38	38	2.2e-40	2.04e-40	1.26649e-12	1.27e-12	1	1	-0.929922	-2.74076	0.929922	1.81084	33.9294
CG32702	411	411	678	678	5.45e-16	1.28e-15	1089	392	375	375	361	361	0.631836	0.109776	1.7286e-06	1.04e-06	1	1	-0.722147	-0.0548918	0.722147	0.667255	51.9754
CG6281	1480	1480	1071	1071	5.72e-16	1.34e-15	2551	566	487	487	521	521	0.298615	0.0548951	0.000643492	0.000289372	1	1	0.466639	0.0973616	0.466639	0.369277	55.8236
CG30264	160	160	46	46	5.85e-16	1.37e-15	206	45	12	12	42	42	5.21e-05	1.38e-05	1	0.246323	1	0	1.79837	1.80735	1.79837	0.00898878	99.5027
CG3767	1517	1517	1997	1997	5.83e-16	1.37e-15	3514	640	1116	1116	589	589	9.46e-38	8.26e-38	2.5037e-09	1.96e-09	1	1	-0.396613	-0.921997	0.396613	0.525384	43.0167
CG10006	966	966	1356	1356	5.89e-16	1.38e-15	2322	343	360	360	316	316	0.0980869	0.0193178	0.0191982	0.00699863	1	0	-0.489262	-0.188072	0.489262	0.30119	61.8965
CG4486	2914	2914	2328	2328	6.05e-16	1.42e-15	5242	651	849	849	599	599	5.4e-11	2.04e-11	1.03326e-21	1.75e-21	1	1	0.32391	-0.503209	0.32391	0.827118	28.1409
CG32147	227	227	434	434	6.55e-16	1.53e-15	661	165	211	211	152	152	0.0022881	0.000534594	0.0179796	0.00659307	1	0	-0.935003	-0.473172	0.935003	0.461831	66.9373
CG4670	2426	2426	1895	1895	6.87e-16	1.61e-15	4321	1706	1013	1013	1570	1570	4.64e-28	3.2e-28	0.000158262	7.66e-05	1	1	0.356382	0.63213	0.356382	0.275749	56.3779
CG14716	1994	1994	2537	2537	7.54e-16	1.76e-15	4531	441	533	533	406	406	3.83e-05	1.03e-05	0.691081	0.182283	1	0	-0.347458	-0.392656	0.347458	0.0451977	88.4892
CG7577	0	1	56	56	8.05e-16	1.88e-15	57	0	21	21	0	1	1.1e-05	3.07e-06	0.481986	0.132766	1	0	-5.80735	-4.39232	5.80735	1.41504	80.4076
CG33841	0	1	56	56	8.05e-16	1.88e-15	57	37	10	10	35	35	0.000247088	6.26e-05	3.84846e-17	5.11e-17	1	1	-5.80735	1.80735	5.80735	7.61471	43.2672
CG32369	566	566	326	326	8.23e-16	1.92e-15	892	244	173	173	225	225	0.010486	0.0022995	0.0188404	0.00688324	1	0	0.79593	0.379153	0.79593	0.416777	65.6325
CG13512	78	78	214	214	8.23e-16	1.92e-15	292	345	96	96	318	318	7.31e-29	5.15e-29	5.29012e-41	1.82e-40	1	1	-1.45606	1.72792	1.45606	3.18399	31.3804
CG5611	241	241	95	95	8.97e-16	2.09e-15	336	117	70	70	108	108	0.00540103	0.00121602	0.0129709	0.00487474	1	1	1.34303	0.625604	1.34303	0.717429	65.1812
CG14681	278	278	502	502	8.99e-16	2.1e-15	780	66	169	169	61	61	6.43e-13	2.65e-13	0.0109254	0.00415173	1	1	-0.852602	-1.47014	0.852602	0.61754	57.9946
CG5092	1322	1322	940	940	9.77e-16	2.28e-15	2262	915	563	563	842	842	1e-13	4.28e-14	0.387976	0.109764	1	0	0.49199	0.580685	0.49199	0.0886958	84.7257
CG11842	1363	1363	975	975	1.04e-15	2.43e-15	2338	205	431	431	189	189	1.06e-22	6.2e-23	2.16532e-35	6.22e-35	1	1	0.483311	-1.1893	0.483311	1.67261	22.4178
CG5191	775	775	490	490	1.07e-15	2.49e-15	1265	387	247	247	356	356	1.04e-05	2.91e-06	0.362522	0.103325	1	0	0.661415	0.527366	0.661415	0.134048	83.1484
CG2210	8531	8531	7515	7515	1.1e-15	2.55e-15	16046	7215	4593	4593	6637	6637	2.87e-83	5.37e-83	2.72833e-22	4.77e-22	1	1	0.182942	0.531094	0.182942	0.348153	34.4462
CG12086	3448	3448	4147	4147	1.1e-15	2.56e-15	7595	1989	1823	1823	1830	1830	0.920924	0.154433	3.1473e-06	1.84e-06	1	1	-0.266308	0.00552909	0.266308	0.271837	49.4863
CG31284	1298	1298	1740	1740	1.1e-15	2.56e-15	3038	530	997	997	488	488	1.87e-40	1.74e-40	1.67924e-10	1.46e-10	1	1	-0.422797	-1.03071	0.422797	0.607915	41.0199
CG15386	723	723	449	449	1.14e-15	2.65e-15	1172	448	217	217	413	413	4.79e-15	2.16e-15	0.112662	0.0359088	1	0	0.68728	0.928447	0.68728	0.241167	74.0247
CG8310	562	562	324	324	1.15e-15	2.66e-15	886	167	202	202	154	154	0.0126295	0.00274866	1.14183e-10	1e-10	1	1	0.794576	-0.391425	0.794576	1.186	40.1184
CG32217	4490	4490	3762	3762	1.16e-15	2.7e-15	8252	2826	1657	1657	2600	2600	1.26e-47	1.35e-47	9.14592e-13	9.27e-13	1	1	0.255216	0.649938	0.255216	0.394722	39.2677
CG2046	741	741	1083	1083	1.17e-15	2.71e-15	1824	479	455	455	441	441	0.664095	0.114774	2.24777e-05	1.2e-05	1	1	-0.547488	-0.0450879	0.547488	0.5024	52.1473
CG9127	4375	4375	5157	5157	1.21e-15	2.79e-15	9532	2470	2267	2267	2272	2272	0.952657	0.159186	4.09726e-06	2.37e-06	1	1	-0.237249	0.00317844	0.237249	0.240427	49.6673
CG32473	5281	5281	4490	4490	1.28e-15	2.97e-15	9771	3949	2461	2461	3633	3633	3.61e-51	4.2e-51	6.08385e-12	5.79e-12	1	1	0.234096	0.561917	0.234096	0.327821	41.6602
CG7332	865	865	563	563	1.3e-15	3e-15	1428	650	292	292	598	598	5.31e-25	3.35e-25	0.00143357	0.000616756	1	1	0.619565	1.03418	0.619565	0.414612	59.909
CG30116	1017	1017	687	687	1.3e-15	3e-15	1704	273	376	376	252	252	8.5e-07	2.57e-07	5.08763e-17	6.67e-17	1	1	0.565938	-0.577309	0.565938	1.14325	33.1116
CG4722	91	91	13	13	1.4e-15	3.24e-15	104	44	8	8	41	41	1.96e-06	5.79e-07	0.615519	0.164609	1	0	2.80735	2.35755	2.80735	0.449803	86.1903
CG17228	586	586	343	343	1.4e-15	3.24e-15	929	187	206	206	173	173	0.100105	0.019687	8.47431e-09	6.35e-09	1	1	0.772692	-0.251872	0.772692	1.02456	42.9929
CG18572	176	176	360	360	1.42e-15	3.29e-15	536	1256	596	596	1156	1156	2.28e-41	2.17e-41	6.68618e-42	2.36e-41	1	1	-1.03242	0.955757	1.03242	1.98818	34.1793
CG6207	853	853	554	554	1.53e-15	3.54e-15	1407	686	379	379	631	631	2.04e-15	9.3e-16	0.373779	0.106115	1	0	0.62266	0.735442	0.62266	0.112782	84.6647
CG10579	609	609	361	361	1.54e-15	3.55e-15	970	403	212	212	371	371	4.58e-11	1.73e-11	0.744847	0.194541	1	0	0.754443	0.807355	0.754443	0.0529115	93.4463
CG9132	632	632	949	949	1.54e-15	3.55e-15	1581	563	552	552	518	518	0.313051	0.057382	1.90697e-05	1.03e-05	1	1	-0.586484	-0.0917162	0.586484	0.494767	54.2412
CG3356	1177	1177	1597	1597	1.58e-15	3.64e-15	2774	1005	700	700	925	925	2.62e-08	8.62e-09	1.77648e-20	2.83e-20	1	1	-0.44025	0.402098	0.44025	0.842348	34.3249
CG3114	242	242	451	451	1.7e-15	3.91e-15	693	334	257	257	308	308	0.0353278	0.00735072	4.01062e-12	3.87e-12	1	1	-0.89812	0.261162	0.89812	1.15928	43.6531
CG31543	848	848	1209	1209	1.75e-15	4.03e-15	2057	615	766	766	566	566	4.7e-08	1.53e-08	0.475774	0.131334	1	0	-0.511678	-0.436542	0.511678	0.0751357	87.196
CG4264	33838	33838	31801	31801	1.9e-15	4.37e-15	65639	42753	23767	23767	39325	39325	4.940656e-324	4.446591e-323	0	0	1	1	0.0895722	0.726487	0.0895722	0.636915	12.3295
CG8881	1113	1113	1521	1521	1.93e-15	4.43e-15	2634	227	469	469	209	209	7.25e-24	4.4e-24	4.676e-08	3.29e-08	1	1	-0.450567	-1.16608	0.450567	0.715518	38.6393
CG3283	14571	14571	13245	13245	1.93e-15	4.43e-15	27816	4963	5713	5713	4566	4566	1.11e-29	7.98e-30	2.37557e-43	8.84e-43	1	1	0.137652	-0.323318	0.137652	0.46097	22.9948
CG9943	464	464	252	252	1.97e-15	4.51e-15	716	268	132	132	247	247	3.63e-09	1.25e-09	0.946947	0.239134	1	0	0.880701	0.903973	0.880701	0.023272	97.4256
CG18404	1233	1233	869	869	2.07e-15	4.75e-15	2102	610	622	622	562	562	0.086366	0.0171327	6.70559e-10	5.51e-10	1	1	0.504745	-0.146344	0.504745	0.651089	43.6693
CG7079	415	415	677	677	2.09e-15	4.79e-15	1092	73	243	243	68	68	3.12e-24	1.92e-24	7.76079e-08	5.33e-08	1	1	-0.706044	-1.83735	0.706044	1.13131	38.4273
CG3454	430	430	696	696	2.12e-15	4.87e-15	1126	111	307	307	103	103	1.2e-24	7.47e-25	1.59096e-06	9.63e-07	1	1	-0.694751	-1.57559	0.694751	0.880844	44.0945
CG4068	1350	1350	1795	1795	2.19e-15	5.01e-15	3145	1173	526	526	1079	1079	4.81e-44	4.77e-44	2.25483e-57	1.16e-56	1	1	-0.411024	1.03656	0.411024	1.44758	22.1146
CG9312	745	745	469	469	2.25e-15	5.16e-15	1214	317	156	156	292	292	1.3e-10	4.84e-11	0.17081	0.0525457	1	0	0.667653	0.904422	0.667653	0.23677	73.8209
CG8766	1724	1724	2222	2222	2.33e-15	5.34e-15	3946	569	958	958	524	524	9.36e-30	6.77e-30	2.53604e-08	1.83e-08	1	1	-0.366099	-0.870459	0.366099	0.50436	42.0582
CG7203	88982	88982	92355	92355	2.4e-15	5.48e-15	181337	19943	31374	31374	18344	18344	9.881313e-324	8.399116e-323	0	0	1	1	-0.0536765	-0.774261	0.0536765	0.720585	6.93261
CG5835	1485	1485	1084	1084	2.62e-15	5.99e-15	2569	447	556	556	412	412	4.14e-06	1.19e-06	6.53558e-16	8.04e-16	1	1	0.454098	-0.432441	0.454098	0.886539	33.8718
CG4389	6112	6112	5268	5268	2.66e-15	6.07e-15	11380	3085	2527	2527	2838	2838	2.3e-05	6.28e-06	0.327424	0.0944512	1	0	0.214389	0.167449	0.214389	0.0469403	82.0379
CG31623	37	37	140	140	2.66e-15	6.08e-15	177	16	87	87	15	15	1.65e-13	7.01e-14	0.263642	0.0778637	1	0	-1.91983	-2.53605	1.91983	0.616223	75.7015
CG5379	228	228	430	430	2.84e-15	6.47e-15	658	27	91	91	25	25	5.31e-10	1.92e-10	0.00520851	0.00207939	1	1	-0.915303	-1.86394	0.915303	0.948636	49.1059
CG17652	167	167	52	52	2.93e-15	6.67e-15	219	117	36	36	108	108	1.5e-09	5.28e-10	0.803184	0.207133	1	0	1.68326	1.58496	1.68326	0.0983021	94.4823
CG6105	10463	10463	11637	11637	2.97e-15	6.76e-15	22100	4584	6050	6050	4217	4217	1.9e-73	3.17e-73	4.53381e-26	9.34e-26	1	1	-0.153423	-0.520718	0.153423	0.367296	29.4637
CG5695	2413	2413	1895	1895	3.12e-15	7.09e-15	4308	1343	1095	1095	1236	1236	0.00372574	0.000854444	0.0200472	0.00728436	1	0	0.34863	0.174748	0.34863	0.173882	66.7219
CG1665	869	869	570	570	3.18e-15	7.23e-15	1439	449	293	293	413	413	7.16e-06	2.03e-06	0.42576	0.119299	1	0	0.608394	0.495241	0.608394	0.113153	84.318
CG4143	934	934	623	623	3.22e-15	7.31e-15	1557	1073	512	512	987	987	5e-35	4.15e-35	0.000858746	0.000379701	1	1	0.58419	0.946906	0.58419	0.362716	61.6946
CG12202	1254	1254	889	889	3.23e-15	7.33e-15	2143	2364	676	676	2175	2175	4.46e-182	1.97e-181	1.16619e-40	3.96e-40	1	1	0.496282	1.68592	0.496282	1.18964	29.4369
CG17255	2607	2607	2068	2068	3.35e-15	7.61e-15	4675	2760	1108	1108	2539	2539	2.76e-127	8.17e-127	1.92068e-38	6.16e-38	1	1	0.334154	1.1963	0.334154	0.862148	27.9323
CG7693	1998	1998	1530	1530	3.44e-15	7.81e-15	3528	1114	905	905	1025	1025	0.00673871	0.00150324	0.0132178	0.00495915	1	1	0.385025	0.179634	0.385025	0.205391	65.2125
CG8721	764	764	486	486	3.64e-15	8.25e-15	1250	320	417	417	295	295	5.49e-06	1.57e-06	4.0787e-17	5.4e-17	1	1	0.652616	-0.499332	0.652616	1.15195	36.1647
CG2512	2745	2745	2192	2192	3.71e-15	8.42e-15	4937	2373	1265	1265	2183	2183	1.28e-55	1.62e-55	1.66263e-12	1.65e-12	1	1	0.324558	0.787175	0.324558	0.462616	41.2308
CG13086	545	545	315	315	3.98e-15	9.03e-15	860	96	114	114	89	89	0.0918453	0.0181582	4.72696e-07	3.01e-07	1	1	0.790904	-0.357157	0.790904	1.14806	40.79
CG7592	19394	19394	17879	17879	4.4e-15	9.95e-15	37273	573	4612	4612	528	528	0	0	0	0	1	1	0.117344	-3.12678	0.117344	3.24413	3.49086
CG32234	748	748	474	474	4.43e-15	1e-14	1222	158	253	253	146	146	9.42e-08	3.03e-08	1.31939e-17	1.8e-17	1	1	0.658151	-0.793169	0.658151	1.45132	31.1998
CG11793	7893	7893	8910	8910	4.5e-15	1.02e-14	16803	3212	3965	3965	2955	2955	5.68e-34	4.58e-34	1.88159e-09	1.49e-09	1	1	-0.174852	-0.424163	0.174852	0.249311	41.2228
CG8286	3179	3179	2584	2584	4.82e-15	1.09e-14	5763	1243	1216	1216	1144	1144	0.143859	0.0277254	4.65396e-08	3.27e-08	1	1	0.298967	-0.0880562	0.298967	0.387023	43.5818
CG6106	65	65	188	188	4.87e-15	1.1e-14	253	26	62	62	24	24	5.08e-05	1.35e-05	0.673273	0.178102	1	0	-1.53222	-1.36923	1.53222	0.162987	90.3854
CG1747	468	468	740	740	4.88e-15	1.1e-14	1208	158	351	351	146	146	1.6e-20	8.83e-21	0.000246145	0.000117103	1	1	-0.661017	-1.2655	0.661017	0.604486	52.2335
CG6308	55	55	171	171	4.9e-15	1.11e-14	226	44	95	95	41	41	4.17e-06	1.2e-06	0.268516	0.0791318	1	0	-1.63649	-1.2123	1.63649	0.424189	79.4151
CG18146	207	207	399	399	5.1e-15	1.15e-14	606	43	50	50	40	40	0.342833	0.0624716	0.0598473	0.0200788	1	0	-0.946758	-0.321928	0.946758	0.62483	60.2421
CG4918	17139	17139	15720	15720	5.13e-15	1.16e-14	32859	17343	9228	9228	15953	15953	4.940656e-324	4.446591e-323	2.3979e-161	4.09e-160	1	1	0.124682	0.789738	0.124682	0.665056	15.7877
CG1404	3137	3137	2547	2547	5.31e-15	1.2e-14	5684	6032	2081	2081	5549	5549	0	0	1.30304e-97	1.17e-96	1	1	0.300587	1.41495	0.300587	1.11436	21.2436
CG11192	119	119	27	27	5.58e-15	1.26e-14	146	45	6	6	42	42	1.01e-07	3.24e-08	0.384996	0.10906	1	0	2.13993	2.80735	2.13993	0.667425	76.2259
CG9993	381	381	629	629	5.67e-15	1.28e-14	1010	138	805	805	127	127	3.49e-121	9.82e-121	1.35462e-34	3.8e-34	1	1	-0.723269	-2.66416	0.723269	1.94089	27.1481
CG8950	63	63	184	184	6.32e-15	1.42e-14	247	191	127	127	176	176	0.00573464	0.00128811	1.52011e-14	1.73e-14	1	1	-1.54628	0.470747	1.54628	2.01703	43.3945
CG12105	3283	3283	2681	2681	6.77e-15	1.52e-14	5964	988	882	882	909	909	0.538987	0.0950825	0.00142267	0.000612279	1	1	0.292244	0.0435016	0.292244	0.248742	54.0206
CG7598	1192	1192	841	841	7.17e-15	1.61e-14	2033	534	420	420	492	492	0.0186718	0.00399957	0.0194757	0.00708823	1	0	0.503207	0.228269	0.503207	0.274938	64.6675
CG13295	672	672	989	989	7.43e-15	1.67e-14	1661	302	509	509	278	278	1.48e-16	7.09e-17	0.0164682	0.00607925	1	0	-0.557509	-0.872581	0.557509	0.315071	63.892
CG2682	558	558	327	327	7.53e-15	1.69e-14	885	781	245	245	719	719	1.19e-54	1.48e-54	8.99513e-08	6.14e-08	1	1	0.770974	1.55321	0.770974	0.782236	49.6375
CG11852	1646	1646	1229	1229	7.73e-15	1.73e-14	2875	241	191	191	222	222	0.139795	0.0270044	0.184428	0.0563326	1	0	0.421479	0.216987	0.421479	0.204492	67.332
CG7227	465	465	734	734	7.73e-15	1.73e-14	1199	34	208	208	32	32	8.56e-33	6.71e-33	1.06953e-15	1.3e-15	1	1	-0.658549	-2.70044	0.658549	2.04189	24.3867
CG7047	2211	2211	1724	1724	8.68e-15	1.94e-14	3935	530	590	590	488	488	0.00208255	0.000488653	2.09411e-10	1.81e-10	1	1	0.358939	-0.273834	0.358939	0.632773	36.1939
CG11134	882	882	585	585	8.88e-15	1.99e-14	1467	403	317	317	371	371	0.0432423	0.00890279	0.00757195	0.00294768	1	1	0.592342	0.226936	0.592342	0.365406	61.8474
CG5156	114	114	25	25	8.91e-15	1.99e-14	139	117	7	7	108	108	2.25e-24	1.39e-24	0.00437204	0.0017612	1	1	2.18903	3.94753	2.18903	1.7585	55.4532
CG7394	323	323	552	552	9.06e-15	2.03e-14	875	263	268	268	242	242	0.268268	0.0497283	0.000143835	7e-05	1	1	-0.773134	-0.147226	0.773134	0.625908	55.2617
CG5805	1538	1538	1137	1137	9.32e-15	2.08e-14	2675	642	479	479	591	591	0.000683387	0.000167106	0.21444	0.0645754	1	0	0.435823	0.303132	0.435823	0.132691	76.6601
CG5112	1646	1646	2122	2122	9.31e-15	2.08e-14	3768	1581	1120	1120	1455	1455	4.37e-11	1.65e-11	1.03961e-23	1.95e-23	1	1	-0.36646	0.37752	0.36646	0.743981	33.0013
CG30411	544	544	317	317	9.43e-15	2.11e-14	861	150	192	192	138	138	0.00346521	0.000796474	3.17259e-11	2.87e-11	1	1	0.779124	-0.476438	0.779124	1.25556	38.2921
CG5783	201	201	74	74	9.96e-15	2.22e-14	275	82	21	21	76	76	1.72e-08	5.72e-09	0.344793	0.0989383	1	0	1.4416	1.85561	1.4416	0.414012	77.6886
CG9441	1552	1552	2014	2014	1.07e-14	2.39e-14	3566	354	676	676	326	326	7.92e-29	5.57e-29	3.05514e-10	2.59e-10	1	1	-0.375935	-1.05215	0.375935	0.676216	35.7301
CG18243	772	772	1107	1107	1.12e-14	2.48e-14	1879	380	499	499	350	350	3.55e-07	1.1e-07	0.966488	0.243617	1	0	-0.519982	-0.511685	0.519982	0.00829758	98.4293
CG8029	13807	13807	12552	12552	1.12e-14	2.48e-14	26359	6132	6979	6979	5641	5641	1.02e-32	7.96e-33	9.11044e-46	3.64e-45	1	1	0.137483	-0.307069	0.137483	0.444552	23.621
CG33484	6691	6691	5826	5826	1.11e-14	2.48e-14	12517	1921	4019	4019	1767	1767	1.42e-197	6.82e-197	1.0029e-187	2.14e-186	1	1	0.199716	-1.18553	0.199716	1.38525	12.6007
CG3957	1519	1519	1976	1976	1.13e-14	2.51e-14	3495	612	508	508	563	563	0.098886	0.0194589	2.04012e-07	1.35e-07	1	1	-0.379461	0.148306	0.379461	0.527768	41.8264
CG31150	1849	1849	1408	1408	1.15e-14	2.56e-14	3257	532	607	607	490	490	0.000456058	0.00011293	3.86137e-12	3.73e-12	1	1	0.393098	-0.308915	0.393098	0.702013	35.8957
CG30283	6	6	69	69	1.16e-14	2.59e-14	75	4	25	25	4	4	0.000103716	2.7e-05	0.459706	0.127631	1	0	-3.52356	-2.64386	3.52356	0.879706	80.0215
CG32029	66	66	5	5	1.19e-14	2.64e-14	71	60	11	11	56	56	2.15e-08	7.1e-09	0.111913	0.0357025	1	0	3.72247	2.34792	3.72247	1.37454	73.0324
CG17105	0	1	52	52	1.2e-14	2.66e-14	53	1	35	35	1	1	1.08e-09	3.83e-10	1	0.246323	1	0	-5.70044	-5.12928	5.70044	0.571157	90.893
CG15547	229	229	92	92	1.26e-14	2.78e-14	321	194	60	60	179	179	6.16e-15	2.76e-15	0.387525	0.109649	1	0	1.31564	1.57693	1.31564	0.261283	83.4308
CG12358	500	500	775	775	1.33e-14	2.95e-14	1275	521	518	518	480	480	0.241498	0.0451018	2.38104e-05	1.27e-05	1	1	-0.632268	-0.109918	0.632268	0.522351	54.7599
CG6705	1277	1277	1697	1697	1.41e-14	3.12e-14	2974	357	683	683	329	329	3.51e-29	2.5e-29	4.33864e-09	3.32e-09	1	1	-0.410228	-1.0538	0.410228	0.64357	38.9285
CG15088	387	387	201	201	1.43e-14	3.17e-14	588	111	68	68	103	103	0.00912208	0.00201007	0.203468	0.0616243	1	0	0.945138	0.599038	0.945138	0.3461	73.1962
CG5285	44	44	149	149	1.52e-14	3.36e-14	193	56	76	76	52	52	0.0416383	0.00859409	0.000771513	0.000343232	1	1	-1.75974	-0.547488	1.75974	1.21225	59.2108
CG7073	3506	3506	2891	2891	1.56e-14	3.45e-14	6397	1697	1346	1346	1561	1561	7.16e-05	1.89e-05	0.323143	0.0932819	1	0	0.278257	0.213792	0.278257	0.0644653	81.1903
CG13072	321	321	547	547	1.59e-14	3.52e-14	868	297	287	287	274	274	0.612447	0.106724	1.07767e-05	5.95e-06	1	1	-0.768968	-0.0668748	0.768968	0.702093	52.273
CG16771	860	860	1209	1209	1.74e-14	3.84e-14	2069	237	782	782	218	218	4.23e-75	7.19e-75	5.78931e-28	1.29e-27	1	1	-0.491406	-1.84284	0.491406	1.35143	26.6657
CG1751	1093	1093	1482	1482	1.85e-14	4.09e-14	2575	653	688	688	601	601	0.0165705	0.00356995	0.0146304	0.00545164	1	0	-0.439252	-0.195044	0.439252	0.244208	64.2688
CG6022	3852	3852	4555	4555	1.85e-14	4.09e-14	8407	1800	2320	2320	1656	1656	5.71e-26	3.7e-26	1.31424e-05	7.2e-06	1	1	-0.241843	-0.486422	0.241843	0.244579	49.7188
CG17107	397	397	644	644	1.86e-14	4.1e-14	1041	43	452	452	40	40	1.97e-89	4.01e-89	7.61422e-39	2.47e-38	1	1	-0.697922	-3.49825	0.697922	2.80033	19.9506
CG31911	1569	1569	1168	1168	1.87e-14	4.12e-14	2737	1488	586	586	1369	1369	6.18e-72	1.01e-71	6.0199e-19	8.79e-19	1	1	0.425805	1.22415	0.425805	0.798345	34.7837
CG8340	718	718	1039	1039	1.93e-14	4.25e-14	1757	1100	624	624	1012	1012	7.05e-22	4.04e-22	1.81195e-34	5.05e-34	1	1	-0.53314	0.697591	0.53314	1.23073	30.2256
CG10344	143	143	41	41	1.96e-14	4.32e-14	184	167	23	23	154	154	5.37e-25	3.38e-25	0.0269697	0.00958268	1	0	1.80232	2.74322	1.80232	0.940905	65.7008
CG14696	159	159	327	327	1.98e-14	4.36e-14	486	37	54	54	35	35	0.0557783	0.011308	0.225483	0.067594	1	0	-1.04026	-0.625604	1.04026	0.414659	71.4996
CG4795	4590	4590	3885	3885	1.99e-14	4.37e-14	8475	1559	1123	1123	1434	1434	8.36e-10	3e-10	0.089246	0.0289759	1	0	0.24058	0.352687	0.24058	0.112108	68.2133
CG9989	1211	1211	1618	1618	2.07e-14	4.55e-14	2829	217	613	613	200	200	1.7e-49	1.89e-49	9.97609e-22	1.69e-21	1	1	-0.418013	-1.61589	0.418013	1.19787	25.8689
CG18095	535	535	816	816	2.09e-14	4.59e-14	1351	134	324	324	124	124	1.1e-21	6.29e-22	4.4782e-06	2.58e-06	1	1	-0.60903	-1.38565	0.60903	0.776623	43.9526
CG11340	349	349	582	582	2.12e-14	4.66e-14	931	175	525	525	161	161	6.98e-46	7.25e-46	1.6869e-09	1.34e-09	1	1	-0.737792	-1.70526	0.737792	0.967465	43.2658
CG9780	2058	2058	1596	1596	2.23e-14	4.91e-14	3654	554	686	686	510	510	4e-07	1.24e-07	2.4335e-16	3.06e-16	1	1	0.366782	-0.427711	0.366782	0.794494	31.5844
CG9448	1652	1652	1241	1241	2.25e-14	4.94e-14	2893	833	492	492	767	767	9e-15	4.01e-15	0.0218616	0.0079015	1	0	0.412711	0.640568	0.412711	0.227858	64.4288
CG3810	754	754	1081	1081	2.34e-14	5.14e-14	1835	572	511	511	527	527	0.641539	0.111321	5.65604e-07	3.57e-07	1	1	-0.51973	0.0444797	0.51973	0.56421	47.9482
CG3604	254	254	457	457	2.4e-14	5.26e-14	711	55	320	320	51	51	9.46e-49	1.04e-48	2.66891e-15	3.17e-15	1	1	-0.847366	-2.6495	0.847366	1.80214	31.9821
CG12832	841	841	556	556	2.45e-14	5.37e-14	1397	249	206	206	230	230	0.27066	0.0501319	0.00638092	0.0025111	1	1	0.597021	0.15899	0.597021	0.438031	57.6803
CG13432	2023	2023	1566	1566	2.5e-14	5.48e-14	3589	563	611	611	518	518	0.00615584	0.0013779	8.47095e-10	6.88e-10	1	1	0.369412	-0.23822	0.369412	0.607632	37.8091
CG32053	85	85	216	216	2.62e-14	5.72e-14	301	16	67	67	15	15	5.26e-09	1.8e-09	0.0881566	0.0286411	1	0	-1.3455	-2.1592	1.3455	0.813702	62.3146
CG17325	336	336	166	166	2.62e-14	5.73e-14	502	61	60	60	57	57	0.853408	0.144245	0.000398762	0.00018449	1	1	1.01728	-0.0740006	1.01728	1.09128	48.2452
CG6219	42	42	144	144	2.81e-14	6.14e-14	186	224	79	79	207	207	2.16e-14	9.48e-15	6.41849e-27	1.36e-26	1	1	-1.77761	1.38971	1.77761	3.16731	35.9481
CG12000	2989	2989	2429	2429	2.94e-14	6.42e-14	5418	1929	950	950	1775	1775	5.5e-57	7.16e-57	5.73094e-18	7.95e-18	1	1	0.2993	0.90182	0.2993	0.602519	33.1885
CG34225	8	8	73	73	2.98e-14	6.5e-14	81	2	18	18	2	2	0.000402451	0.000100139	1	0.246323	1	0	-3.18982	-3.16993	3.18982	0.0198996	99.38
CG2945	574	574	862	862	2.99e-14	6.52e-14	1436	791	565	565	728	728	6.46e-06	1.84e-06	1.40497e-17	1.91e-17	1	1	-0.586637	0.365688	0.586637	0.952325	38.119
CG12859	1371	1371	1799	1799	3.07e-14	6.69e-14	3170	710	1052	1052	654	654	4.66e-22	2.68e-22	0.000898014	0.00039578	1	1	-0.391967	-0.685772	0.391967	0.293806	57.157
CG2212	1660	1660	1250	1250	3.1e-14	6.75e-14	2910	1201	514	514	1105	1105	8.97e-50	1.01e-49	9.40605e-14	1.02e-13	1	1	0.409255	1.10421	0.409255	0.694951	37.0633
CG1135	677	677	425	425	3.11e-14	6.77e-14	1102	873	312	312	803	803	2.18e-50	2.48e-50	1.28942e-07	8.69e-08	1	1	0.671693	1.36385	0.671693	0.692161	49.2496
CG32088	3	3	58	58	3.29e-14	7.15e-14	61	5	21	21	5	5	0.00249392	0.000580781	0.0484385	0.0164923	1	0	-4.27302	-2.07039	4.27302	2.20263	65.986
CG9390	11915	11915	13116	13116	3.29e-14	7.17e-14	25031	3577	6621	6621	3291	3291	6.45e-250	4.06e-249	1.8226e-134	2.41e-133	1	1	-0.138549	-1.00852	0.138549	0.869974	13.7378
CG15263	45	45	149	149	3.3e-14	7.18e-14	194	3	421	421	3	3	5.87e-121	1.65e-120	3.28211e-21	5.41e-21	1	1	-1.72732	-7.13271	1.72732	5.4054	24.2168
CG8457	33	33	127	127	3.31e-14	7.19e-14	160	16	100	100	15	15	1.35e-16	6.47e-17	0.110057	0.0351653	1	0	-1.94429	-2.73697	1.94429	0.792675	71.0382
CG11044	659	659	411	411	3.34e-14	7.24e-14	1070	185	261	261	171	171	1.73e-05	4.77e-06	1.09073e-14	1.25e-14	1	1	0.68114	-0.610053	0.68114	1.29119	34.5347
CG9681	1420	1420	1854	1854	3.5e-14	7.6e-14	3274	915	839	839	842	842	0.961096	0.16058	7.18397e-06	4.05e-06	1	1	-0.38475	0.00514942	0.38475	0.3899	49.6676
CG14048	277	277	486	486	3.53e-14	7.66e-14	763	279	239	239	257	257	0.445303	0.0795295	7.39183e-08	5.08e-08	1	1	-0.81107	0.104758	0.81107	0.915828	46.9669
CG1129	1054	1054	1432	1432	3.58e-14	7.75e-14	2486	496	773	773	457	457	1.7e-19	9.06e-20	0.00227313	0.000952092	1	1	-0.442157	-0.758274	0.442157	0.316118	58.3109
CG17291	2927	2927	2375	2375	3.62e-14	7.85e-14	5302	2394	1424	1424	2203	2203	1.85e-38	1.65e-38	2.12905e-07	1.4e-07	1	1	0.301495	0.62952	0.301495	0.328025	47.8928
CG5407	848	848	1190	1190	3.7e-14	8.02e-14	2038	463	470	470	426	426	0.150811	0.0289892	0.00314845	0.00129075	1	1	-0.488825	-0.141807	0.488825	0.347018	58.4829
CG8714	952	952	649	649	3.73e-14	8.08e-14	1601	1107	379	379	1019	1019	6.73e-68	1.04e-67	1.07131e-14	1.23e-14	1	1	0.552743	1.42688	0.552743	0.874141	38.7378
CG1372	92	92	16	16	3.78e-14	8.17e-14	108	19593	4114	4114	18022	18022	4.940656e-324	4.446591e-323	0.384782	0.109019	1	0	2.52356	2.13115	2.52356	0.392417	86.5425
CG12129	353	353	179	179	3.79e-14	8.19e-14	532	405	108	108	373	373	3.52e-35	2.93e-35	8.95093e-05	4.47e-05	1	1	0.979709	1.78814	0.979709	0.808436	54.7891
CG3333	674	674	982	982	3.86e-14	8.34e-14	1656	4531	1297	1297	4168	4168	0	0	2.6202e-154	4.2e-153	1	1	-0.542974	1.68418	0.542974	2.22715	19.6011
CG5327	395	395	638	638	3.91e-14	8.44e-14	1033	87	265	265	81	81	6e-24	3.66e-24	3.24788e-07	2.1e-07	1	1	-0.691704	-1.71	0.691704	1.01829	40.4505
CG2304	1218	1218	872	872	3.92e-14	8.47e-14	2090	593	417	417	546	546	3.62e-05	9.71e-06	0.430389	0.120514	1	0	0.482114	0.388854	0.482114	0.0932605	83.7913
CG14645	7499	7499	8455	8455	3.94e-14	8.5e-14	15954	5921	8616	8616	5447	5447	1.47e-158	5.51e-158	2.39059e-47	9.93e-47	1	1	-0.173107	-0.661556	0.173107	0.48845	26.1666
CG9932	5124	5124	5919	5919	4.06e-14	8.76e-14	11043	1477	2418	2418	1359	1359	2.76e-67	4.21e-67	3.76821e-29	8.75e-29	1	1	-0.208083	-0.831269	0.208083	0.623186	25.032
CG10991	0	1	50	50	4.62e-14	9.95e-14	51	1	31	31	1	1	1.54e-08	5.13e-09	1	0.246323	1	0	-5.64386	-4.9542	5.64386	0.68966	89.1109
CG4511	563	563	846	846	4.79e-14	1.03e-13	1409	828	437	437	762	762	4.74e-21	2.65e-21	2.13881e-33	5.74e-33	1	1	-0.587523	0.802158	0.587523	1.38968	29.7148
CG31663	1374	1374	1006	1006	4.79e-14	1.03e-13	2380	327	567	567	301	301	1.23e-19	6.62e-20	1.82587e-31	4.59e-31	1	1	0.449752	-0.913585	0.449752	1.36334	24.8058
CG6055	486	486	278	278	4.87e-14	1.05e-13	764	62	113	113	58	58	3.14e-05	8.47e-06	1.7201e-12	1.71e-12	1	1	0.805871	-0.962198	0.805871	1.76807	31.3089
CG6143	2006	2006	1556	1556	4.96e-14	1.07e-13	3562	2252	1224	1224	2072	2072	8.56e-50	9.61e-50	3.49143e-08	2.49e-08	1	1	0.36648	0.75942	0.36648	0.392941	48.2578
CG10462	352	352	179	179	5.04e-14	1.08e-13	531	766	268	268	705	705	6.06e-46	6.31e-46	0.0132034	0.00495679	1	1	0.975616	1.39539	0.975616	0.419774	69.9171
CG10596	28644	28644	30476	30476	5.03e-14	1.08e-13	59120	7593	13331	13331	6985	6985	4.940656e-324	4.446591e-323	3.1257e-269	1.07e-267	1	1	-0.0894406	-0.932453	0.0894406	0.843012	9.59197
CG8293	1535	1535	1145	1145	5.18e-14	1.11e-13	2680	784	668	668	722	722	0.155126	0.0297593	0.00125512	0.000543601	1	1	0.422891	0.112151	0.422891	0.31074	57.6435
CG8929	985	985	678	678	5.28e-14	1.13e-13	1663	821	400	400	756	756	6.6e-26	4.27e-26	0.0009353	0.000411667	1	1	0.538838	0.918386	0.538838	0.379548	58.6723
CG14669	214	214	85	85	5.41e-14	1.16e-13	299	65	61	61	60	60	1	0.164833	2.63319e-05	1.4e-05	1	1	1.33208	-0.0238467	1.33208	1.35592	49.5564
CG6459	1193	1193	1590	1590	5.52e-14	1.18e-13	2783	1814	922	922	1669	1669	2.67e-49	2.96e-49	9.50874e-57	4.83e-56	1	1	-0.414433	0.856145	0.414433	1.27058	24.5953
CG10226	1826	1826	2310	2310	5.53e-14	1.19e-13	4136	429	1298	1298	395	395	4.02e-112	1.04e-111	5.73123e-52	2.64e-51	1	1	-0.339206	-1.71637	0.339206	1.37716	19.763
CG5654	3513	3513	2910	2910	5.61e-14	1.2e-13	6423	2738	1750	1750	2519	2519	4.6e-32	3.55e-32	1.07836e-05	5.96e-06	1	1	0.271684	0.525496	0.271684	0.253812	51.7005
CG31022	1085	1085	762	762	5.86e-14	1.25e-13	1847	638	312	312	587	587	3.24e-20	1.77e-20	0.000993224	0.00043602	1	1	0.509832	0.911814	0.509832	0.401982	55.914
CG32154	163	163	329	329	5.9e-14	1.26e-13	492	124	283	283	115	115	1.89e-17	9.33e-18	0.190584	0.0580108	1	0	-1.01322	-1.29917	1.01322	0.285953	77.9896
CG4201	358	358	589	589	5.87e-14	1.26e-13	947	358	261	261	330	330	0.00511263	0.00115445	6.204e-12	5.9e-12	1	1	-0.718308	0.338416	0.718308	1.05672	40.4673
CG11734	1273	1273	921	921	5.94e-14	1.27e-13	2194	716	471	471	659	659	2.47e-08	8.15e-09	0.882034	0.224148	1	0	0.466959	0.484551	0.466959	0.017592	96.3694
CG15111	773	773	1098	1098	5.96e-14	1.27e-13	1871	487	575	575	448	448	8.01e-05	2.1e-05	0.207759	0.0627947	1	0	-0.506338	-0.360063	0.506338	0.146275	77.5863
CG6439	22267	22267	20710	20710	6.07e-14	1.3e-13	42977	7547	9599	9599	6942	6942	3.77e-95	8.27e-95	5.0317e-103	4.77e-102	1	1	0.10458	-0.467533	0.10458	0.572112	15.4545
CG11893	29	29	118	118	6.16e-14	1.31e-13	147	11	83	83	11	11	8e-15	3.58e-15	0.113051	0.0360282	1	0	-2.02466	-2.91561	2.02466	0.890946	69.4422
CG3153	1364	1364	999	999	6.25e-14	1.33e-13	2363	343	341	341	316	316	0.349111	0.0635592	1.32613e-05	7.25e-06	1	1	0.449287	-0.109847	0.449287	0.559134	44.5535
CG12225	2301	2301	1819	1819	6.28e-14	1.34e-13	4120	1691	1012	1012	1556	1556	5.58e-27	3.73e-27	0.000135342	6.61e-05	1	1	0.339115	0.620633	0.339115	0.281517	54.6403
CG4463	3189	3189	2617	2617	6.4e-14	1.36e-13	5806	161	338	338	149	149	6.16e-18	3.11e-18	3.22086e-25	6.44e-25	1	1	0.28519	-1.18171	0.28519	1.4669	16.2771
CG16978	691	691	999	999	6.98e-14	1.48e-13	1690	247	459	459	228	228	8.04e-19	4.22e-19	0.000489701	0.000223947	1	1	-0.531799	-1.00946	0.531799	0.477661	52.6815
CG12135	350	350	578	578	6.94e-14	1.48e-13	928	411	312	312	379	379	0.0119924	0.00261553	8.30564e-12	7.81e-12	1	1	-0.723715	0.280652	0.723715	1.00437	41.8797
CG5472	856	856	573	573	7.21e-14	1.53e-13	1429	207	287	287	191	191	1.31e-05	3.63e-06	5.05961e-14	5.58e-14	1	1	0.579076	-0.587478	0.579076	1.16655	33.1729
CG2175	66	66	6	6	7.26e-14	1.54e-13	72	14369	228	228	13217	13217	4.940656e-324	4.446591e-323	0.00152117	0.000651474	1	1	3.45943	5.85722	3.45943	2.39779	59.0627
CG3959	694	694	442	442	7.58e-14	1.61e-13	1136	764	268	268	703	703	1.27e-45	1.31e-45	4.65621e-08	3.28e-08	1	1	0.650889	1.39129	0.650889	0.740402	46.7831
CG14687	1516	1516	1131	1131	7.62e-14	1.62e-13	2647	383	466	466	353	353	8.88e-05	2.32e-05	1.44219e-12	1.44e-12	1	1	0.422671	-0.400662	0.422671	0.823333	33.9221
CG14419	242	242	104	104	8.3e-14	1.76e-13	346	71	107	107	66	66	0.00226217	0.000528761	5.21913e-12	5e-12	1	1	1.21842	-0.697073	1.21842	1.9155	38.8786
CG31217	1177	1177	1568	1568	8.91e-14	1.89e-13	2745	247	619	619	228	228	1.85e-42	1.8e-42	2.85448e-17	3.82e-17	1	1	-0.413811	-1.44091	0.413811	1.02709	28.7188
CG13090	565	565	845	845	9.04e-14	1.92e-13	1410	400	385	385	368	368	0.559873	0.0984289	8.87067e-05	4.43e-05	1	1	-0.5807	-0.0651527	0.5807	0.515548	52.9716
CG14899	936	936	640	640	9.16e-14	1.94e-13	1576	582	339	339	536	536	2.86e-11	1.1e-11	0.38937	0.110095	1	0	0.548437	0.660948	0.548437	0.112511	82.9773
CG5014	2133	2133	1673	1673	9.41e-14	1.99e-13	3806	2125	1019	1019	1955	1955	5.49e-67	8.31e-67	5.07682e-16	6.29e-16	1	1	0.350447	0.940015	0.350447	0.589568	37.281
CG3178	103	103	22	22	1e-13	2.13e-13	125	568	63	63	523	523	3.4e-91	7.08e-91	0.0469513	0.0160148	1	0	2.22707	3.05339	2.22707	0.826318	72.9377
CG13811	107	107	24	24	1.05e-13	2.21e-13	131	38	29	29	35	35	0.532309	0.0939953	0.000131439	6.43e-05	1	1	2.1565	0.271302	2.1565	1.8852	53.3563
CG7016	383	383	618	618	1.09e-13	2.3e-13	1001	126	165	165	116	116	0.00410969	0.000938958	0.368622	0.104808	1	0	-0.690262	-0.508341	0.690262	0.181921	79.1419
CG10033	2533	2533	2031	2031	1.14e-13	2.41e-13	4564	1564	1268	1268	1439	1439	0.0010816	0.000260219	0.0542644	0.0183537	1	0	0.318657	0.182512	0.318657	0.136145	70.065
CG13654	294	294	140	140	1.15e-13	2.43e-13	434	92	91	91	85	85	0.706371	0.121454	9.34137e-06	5.19e-06	1	1	1.07039	-0.0984037	1.07039	1.16879	47.8027
CG5507	356	356	184	184	1.16e-13	2.45e-13	540	254	119	119	234	234	9.3e-10	3.32e-10	0.942428	0.238115	1	0	0.952171	0.975547	0.952171	0.0233755	97.6039
CG13386	3	3	56	56	1.19e-13	2.51e-13	59	0	53	53	0	1	6.11e-15	2.74e-15	0.619733	0.165599	1	0	-4.22239	-5.72792	4.22239	1.50553	73.716
CG17028	169	169	335	335	1.2e-13	2.53e-13	504	50	164	164	46	46	9.82e-17	4.73e-17	0.00227683	0.000953317	1	1	-0.987138	-1.83399	0.987138	0.846852	53.8246
CG1100	3447	3447	4091	4091	1.26e-13	2.65e-13	7538	2639	1526	1526	2428	2428	5.85e-47	6.19e-47	1.07596e-57	5.58e-57	1	1	-0.247112	0.670013	0.247112	0.917126	21.2252
CG13360	2983	2983	2437	2437	1.27e-13	2.68e-13	5420	582	1117	1117	536	536	3.98e-47	4.23e-47	3.27353e-59	1.75e-58	1	1	0.291658	-1.05932	0.291658	1.35098	17.7554
CG3850	1318	1318	964	964	1.32e-13	2.78e-13	2282	246	510	510	227	227	6.96e-26	4.5e-26	1.3687e-37	4.24e-37	1	1	0.451245	-1.1678	0.451245	1.61905	21.7962
CG15011	302	302	146	146	1.38e-13	2.91e-13	448	259	110	110	239	239	4.19e-12	1.67e-12	0.760269	0.197896	1	0	1.04858	1.11951	1.04858	0.0709269	93.6645
CG9008	1139	1139	812	812	1.39e-13	2.92e-13	1951	352	377	377	324	324	0.0494512	0.0100988	3.77864e-08	2.69e-08	1	1	0.488216	-0.218571	0.488216	0.706787	40.8548
CG8400	1146	1146	818	818	1.41e-13	2.96e-13	1964	891	364	364	820	820	6.53e-41	6.14e-41	9.0389e-10	7.33e-10	1	1	0.486434	1.17169	0.486434	0.685251	41.5158
CG32284	62	62	5	5	1.42e-13	2.98e-13	67	25	0	1	23	23	2.98e-06	8.67e-07	1	0.246323	1	0	3.63227	4.52356	3.63227	0.891294	80.2966
CG1108	96	96	19	19	1.45e-13	3.04e-13	115	10	21	21	10	10	0.0707556	0.0141816	9.38051e-08	6.39e-08	1	1	2.33703	-1.07039	2.33703	3.40742	40.6833
CG7005	846	846	568	568	1.47e-13	3.08e-13	1414	711	389	389	654	654	2.06e-16	9.79e-17	0.154829	0.0480652	1	0	0.574767	0.74952	0.574767	0.174754	76.6846
CG9748	3896	3896	3270	3270	1.49e-13	3.13e-13	7166	3806	1758	1758	3501	3501	6.66e-130	2e-129	5.4826e-43	2.01e-42	1	1	0.252703	0.993832	0.252703	0.741129	25.4271
CG17453	296	296	142	142	1.5e-13	3.15e-13	438	141	89	89	130	130	0.00673823	0.00150324	0.0460636	0.0157383	1	0	1.05971	0.546634	1.05971	0.513072	67.378
CG18302	348	348	179	179	1.57e-13	3.28e-13	527	40	96	96	37	37	3.19e-07	9.97e-08	2.82365e-15	3.35e-15	1	1	0.959128	-1.37551	0.959128	2.33464	29.1195
CG5987	23	23	104	104	1.7e-13	3.55e-13	127	35	81	81	33	33	8e-06	2.26e-06	0.0490118	0.0166713	1	0	-2.17688	-1.29546	2.17688	0.881422	71.1793
CG5949	220	220	91	91	1.77e-13	3.69e-13	311	466	67	67	429	429	1.17e-65	1.74e-65	9.10612e-08	6.21e-08	1	1	1.27357	2.67874	1.27357	1.40518	47.5434
CG2746	13861	13861	12661	12661	1.79e-13	3.74e-13	26522	12034	6380	6380	11069	11069	2.89e-279	2.05e-278	3.4031e-119	3.83e-118	1	1	0.13064	0.794897	0.13064	0.664257	16.4348
CG17574	1248	1248	906	906	1.8e-13	3.77e-13	2154	548	363	363	505	505	1.62e-06	4.8e-07	0.935081	0.236429	1	0	0.462035	0.476314	0.462035	0.0142789	97.0022
CG10328	198	198	77	77	1.87e-13	3.91e-13	275	464	40	40	427	427	7.53e-83	1.4e-82	7.23416e-12	6.83e-12	1	1	1.36257	3.41616	1.36257	2.05359	39.886
CG10214	434	434	243	243	1.97e-13	4.11e-13	677	402	141	141	370	370	1.01e-24	6.32e-25	0.00262945	0.00109199	1	1	0.836739	1.39183	0.836739	0.555091	60.1179
CG17743	307	307	518	518	1.97e-13	4.11e-13	825	426	335	335	392	392	0.0377356	0.00782792	4.03081e-11	3.62e-11	1	1	-0.754713	0.226693	0.754713	0.981406	43.4713
CG17059	431	431	241	241	2.15e-13	4.47e-13	672	246	127	127	227	227	1.18e-07	3.79e-08	1	0.246323	1	0	0.838655	0.837864	0.838655	0.000790922	99.9058
CG1560	4876	4876	4177	4177	2.14e-13	4.47e-13	9053	2235	1999	1999	2056	2056	0.37918	0.068585	0.000863378	0.000381474	1	1	0.223231	0.0405618	0.223231	0.182669	54.9965
CG5670	20743	20743	19274	19274	2.15e-13	4.48e-13	40017	7991	10920	10920	7351	7351	1.59e-154	5.83e-154	8.4136e-150	1.32e-148	1	1	0.105969	-0.57096	0.105969	0.676929	13.5354
CG9985	1537	1537	1156	1156	2.22e-13	4.63e-13	2693	1300	627	627	1196	1196	5e-41	4.71e-41	9.24992e-09	6.91e-09	1	1	0.410976	0.93168	0.410976	0.520704	44.1113
CG4720	1493	1493	1922	1922	2.24e-13	4.67e-13	3415	1070	979	979	985	985	0.910174	0.152708	5.46226e-06	3.12e-06	1	1	-0.364394	0.00881486	0.364394	0.373209	49.4025
CG4545	236	236	102	102	2.28e-13	4.74e-13	338	28	47	47	26	26	0.0186177	0.00398851	8.34474e-08	5.72e-08	1	1	1.21022	-0.854149	1.21022	2.06437	36.9579
CG8063	841	841	1170	1170	2.3e-13	4.77e-13	2011	172	350	350	159	159	1.55e-17	7.71e-18	1.24629e-05	6.84e-06	1	1	-0.476331	-1.13833	0.476331	0.661997	41.8448
CG8399	1892	1892	1467	1467	2.38e-13	4.95e-13	3359	891	808	808	820	820	0.785152	0.133809	8.07705e-05	4.05e-05	1	1	0.367043	0.0212686	0.367043	0.345775	51.4919
CG9633	672	672	429	429	2.43e-13	5.05e-13	1101	1013	297	297	932	932	1.2e-76	2.08e-76	1.52391e-14	1.73e-14	1	1	0.647484	1.64987	0.647484	1.00238	39.2446
CG15120	80	80	202	202	2.45e-13	5.08e-13	282	16	54	54	15	15	2.61e-06	7.65e-07	0.293419	0.0855884	1	0	-1.33628	-1.848	1.33628	0.511714	72.3098
CG33979	2084	2084	1637	1637	2.48e-13	5.14e-13	3721	1644	849	849	1513	1513	6.39e-43	6.24e-43	4.4543e-10	3.72e-10	1	1	0.348301	0.833576	0.348301	0.485275	41.784
CG3011	9460	9460	8479	8479	2.5e-13	5.19e-13	17939	3676	2304	2304	3382	3382	1.51e-46	1.59e-46	4.98737e-19	7.32e-19	1	1	0.157946	0.553736	0.157946	0.39579	28.5237
CG34208	413	413	228	228	2.52e-13	5.21e-13	641	127	150	150	117	117	0.0499832	0.0102011	1.63608e-08	1.2e-08	1	1	0.857108	-0.358454	0.857108	1.21556	41.3528
CG8774	3429	3429	2849	2849	2.62e-13	5.43e-13	6278	1361	2143	2143	1252	1252	2.86e-53	3.46e-53	8.74787e-63	5.04e-62	1	1	0.267332	-0.775397	0.267332	1.04273	20.4061
CG4035	3544	3544	2954	2954	2.64e-13	5.46e-13	6498	4032	1762	1762	3709	3709	6.83e-156	2.52e-155	1.05114e-49	4.63e-49	1	1	0.262709	1.07382	0.262709	0.811108	24.465
CG14894	450	450	256	256	2.69e-13	5.56e-13	706	431	120	120	397	397	1.24e-35	1.04e-35	9.49073e-07	5.88e-07	1	1	0.813781	1.7261	0.813781	0.912323	47.1455
CG2101	570	570	845	845	2.74e-13	5.66e-13	1415	551	412	412	507	507	0.00191437	0.000450349	2.1395e-12	2.11e-12	1	1	-0.567989	0.299341	0.567989	0.867331	39.5723
CG9904	652	652	944	944	2.79e-13	5.77e-13	1596	410	948	948	378	378	8.45e-57	1.1e-56	3.13461e-12	3.05e-12	1	1	-0.533915	-1.3265	0.533915	0.792586	40.2499
CG16993	291	291	140	140	2.88e-13	5.94e-13	431	42	70	70	39	39	0.00385411	0.000882527	2.83808e-09	2.21e-09	1	1	1.05559	-0.843881	1.05559	1.89947	35.7215
CG7955	1938	1938	1509	1509	2.9e-13	5.98e-13	3447	1150	780	780	1058	1058	9.6e-11	3.59e-11	0.351191	0.100504	1	0	0.360976	0.439794	0.360976	0.0788178	82.0784
CG7281	221	221	403	403	2.94e-13	6.06e-13	624	273	236	236	252	252	0.497166	0.0881784	7.03742e-08	4.86e-08	1	1	-0.866733	0.0946369	0.866733	0.96137	47.4116
CG11001	2614	2614	2112	2112	3e-13	6.19e-13	4726	2333	1275	1275	2146	2146	1.42e-50	1.62e-50	2.09724e-11	1.92e-11	1	1	0.307649	0.751153	0.307649	0.443504	40.957
CG4457	573	573	848	848	3.08e-13	6.34e-13	1421	477	387	387	439	439	0.0759141	0.0151618	4.70308e-09	3.59e-09	1	1	-0.565529	0.181887	0.565529	0.747416	43.0733
CG18012	637	637	402	402	3.1e-13	6.38e-13	1039	641	290	290	590	590	2.45e-24	1.51e-24	0.00997715	0.00381741	1	1	0.664098	1.02466	0.664098	0.360564	64.8114
CG1274	463	463	713	713	3.14e-13	6.48e-13	1176	354	323	323	326	326	0.937433	0.156913	8.72552e-06	4.86e-06	1	1	-0.62289	0.0133378	0.62289	0.636228	49.4704
CG9813	1270	1270	928	928	3.15e-13	6.48e-13	2198	340	622	622	313	313	2.8e-24	1.72e-24	6.65302e-36	1.94e-35	1	1	0.452632	-0.990752	0.452632	1.44338	23.8728
CG3395	11965	11965	13120	13120	3.16e-13	6.5e-13	25085	12057	6639	6639	11091	11091	1.33e-247	8.14e-247	6.2861e-204	1.47e-202	1	1	-0.132947	0.740352	0.132947	0.873299	13.2122
CG4778	1727	1727	2183	2183	3.23e-13	6.63e-13	3910	276	492	492	254	254	2.1e-18	1.08e-18	2.72599e-07	1.78e-07	1	1	-0.338044	-0.95383	0.338044	0.615786	35.4407
CG10882	2702	2702	2192	2192	3.28e-13	6.74e-13	4894	1743	1217	1217	1604	1604	3.37e-13	1.41e-13	0.160359	0.0496167	1	0	0.30178	0.398345	0.30178	0.0965651	75.7584
CG3944	4857	4857	4165	4165	3.38e-13	6.94e-13	9022	2101	1934	1934	1933	1933	1	0.164833	6.23003e-05	3.18e-05	1	1	0.221749	-0.000746157	0.221749	0.222495	49.916
CG7852	1490	1490	1118	1118	3.42e-13	7.02e-13	2608	1135	614	614	1044	1044	3.13e-26	2.04e-26	0.000160395	7.76e-05	1	1	0.414392	0.765811	0.414392	0.351419	54.1115
CG8232	1232	1232	1621	1621	3.46e-13	7.1e-13	2853	901	664	664	829	829	2.15e-05	5.89e-06	1.15972e-14	1.32e-14	1	1	-0.395882	0.320189	0.395882	0.716071	35.6024
CG12242	47	47	0	1	3.48e-13	7.14e-13	48	30	0	1	28	28	1.12e-07	3.58e-08	1	0.246323	1	0	5.55459	4.80735	5.55459	0.747234	88.1426
CG32021	118	118	31	31	3.73e-13	7.64e-13	149	47	31	31	44	44	0.165428	0.03162	0.00156322	0.000668317	1	1	1.92845	0.505235	1.92845	1.42321	57.5371
CG10702	390	390	621	621	3.74e-13	7.66e-13	1011	377	393	393	347	347	0.0980145	0.0193082	0.000599597	0.000270653	1	1	-0.671119	-0.179594	0.671119	0.491525	57.7235
CG4741	245	245	434	434	3.83e-13	7.85e-13	679	110	244	244	102	102	1.47e-14	6.48e-15	0.0363902	0.0126426	1	0	-0.824913	-1.25831	0.824913	0.433399	65.5571
CG10347	328	328	542	542	3.94e-13	8.07e-13	870	369	344	344	340	340	0.908688	0.15249	2.56797e-06	1.52e-06	1	1	-0.724597	-0.0168738	0.724597	0.707723	50.589
CG11241	805	805	1124	1124	3.97e-13	8.12e-13	1929	471	454	454	434	434	0.523758	0.0925651	0.000439988	0.000202685	1	1	-0.481581	-0.0649973	0.481581	0.416584	53.6183
CG3252	1093	1093	779	779	4.14e-13	8.46e-13	1872	471	786	786	434	434	4.51e-24	2.76e-24	1.28581e-35	3.72e-35	1	1	0.488598	-0.856834	0.488598	1.34543	26.6407
CG3620	4050	4050	4730	4730	4.17e-13	8.52e-13	8780	2366	2374	2374	2177	2177	0.00366346	0.000840629	0.0618948	0.0207148	1	0	-0.223918	-0.124979	0.223918	0.0989397	69.355
CG2109	811	811	544	544	4.19e-13	8.55e-13	1355	662	287	287	609	609	2.15e-27	1.45e-27	0.000102686	5.09e-05	1	1	0.576095	1.08539	0.576095	0.509296	53.0772
CG11709	512	512	305	305	4.31e-13	8.8e-13	817	133	121	121	123	123	0.948973	0.158651	0.000791047	0.000351477	1	1	0.747335	0.0236513	0.747335	0.723683	50.8039
CG14375	1933	1933	2411	2411	4.34e-13	8.86e-13	4344	235	629	629	217	217	3.17e-47	3.38e-47	2.15034e-25	4.34e-25	1	1	-0.31879	-1.53536	0.31879	1.21657	20.7631
CG10535	892	892	611	611	4.39e-13	8.94e-13	1503	1055	393	393	971	971	9.96e-57	1.29e-56	3.249e-11	2.94e-11	1	1	0.545871	1.30494	0.545871	0.759071	41.8311
CG31037	980	980	1328	1328	4.61e-13	9.39e-13	2308	735	671	671	677	677	0.891683	0.149974	6.38844e-06	3.62e-06	1	1	-0.438401	0.0128431	0.438401	0.451245	49.2782
CG8937	4605	4605	3936	3936	4.77e-13	9.72e-13	8541	1204	1385	1385	1108	1108	3.14e-08	1.03e-08	8.48443e-17	1.09e-16	1	1	0.226471	-0.321928	0.226471	0.548399	29.227
CG10901	60	60	5	5	4.87e-13	9.91e-13	65	13693	2628	2628	12595	12595	4.940656e-324	4.446591e-323	0.0464156	0.0158475	1	0	3.58496	2.26081	3.58496	1.32415	73.0267
CG17840	352	352	185	185	5.15e-13	1.05e-12	537	153	108	108	141	141	0.0423525	0.00873601	0.0174647	0.00641914	1	0	0.92805	0.384664	0.92805	0.543386	63.071
CG8067	584	584	362	362	5.27e-13	1.07e-12	946	338	166	166	311	311	3.05e-11	1.17e-11	0.222223	0.0667229	1	0	0.689979	0.905731	0.689979	0.215753	76.1792
CG1213	10740	10740	11825	11825	5.29e-13	1.08e-12	22565	2049	2802	2802	1885	1885	4.45e-41	4.21e-41	2.2989e-20	3.63e-20	1	1	-0.138846	-0.571892	0.138846	0.433046	24.2784
CG4726	393	393	623	623	5.4e-13	1.1e-12	1016	108	199	199	100	100	1.07e-08	3.61e-09	0.103328	0.0331532	1	0	-0.664703	-0.992768	0.664703	0.328066	66.9545
CG2087	1018	1018	1371	1371	5.41e-13	1.1e-12	2389	1395	1056	1056	1284	1284	2.65e-06	7.75e-07	3.8027e-17	5.05e-17	1	1	-0.429491	0.282035	0.429491	0.711526	37.6411
CG32302	68	68	8	8	5.63e-13	1.14e-12	76	26	2	2	24	24	1.05e-05	2.94e-06	1	0.246323	1	0	3.08746	3.58496	3.08746	0.4975	86.1226
CG2701	1045	1045	1402	1402	5.63e-13	1.14e-12	2447	702	573	573	646	646	0.0391451	0.00810598	4.18974e-09	3.22e-09	1	1	-0.423983	0.172999	0.423983	0.596982	41.5277
CG9485	23683	23683	22140	22140	5.84e-13	1.18e-12	45823	4808	10891	10891	4423	4423	4.940656e-324	4.446591e-323	0	0	1	1	0.0971966	-1.30004	0.0971966	1.39724	6.50392
CG2678	91	91	18	18	6.37e-13	1.29e-12	109	321	32	32	296	296	1.05e-54	1.31e-54	0.080774	0.0264491	1	0	2.33787	3.20945	2.33787	0.871584	72.8432
CG1572	1630	1630	1244	1244	6.38e-13	1.29e-12	2874	622	560	560	573	573	0.721479	0.123754	0.000480139	0.000220025	1	1	0.389885	0.0331083	0.389885	0.356777	52.2171
CG32435	1760	1760	1358	1358	6.43e-13	1.3e-12	3118	1101	712	712	1013	1013	4.45e-13	1.85e-13	0.12943	0.0407873	1	0	0.374092	0.508685	0.374092	0.134593	73.541
CG11858	154	154	52	52	6.54e-13	1.32e-12	206	267	31	31	246	246	1.04e-42	1.01e-42	8.03978e-05	4.04e-05	1	1	1.56635	2.98832	1.56635	1.42197	52.4157
CG8596	1845	1845	1433	1433	6.58e-13	1.33e-12	3278	558	592	592	514	514	0.0205532	0.00438086	1.88177e-08	1.37e-08	1	1	0.364582	-0.203829	0.364582	0.568411	39.0766
CG13658	185	185	71	71	6.79e-13	1.37e-12	256	86	62	62	80	80	0.153444	0.0294573	0.0018319	0.000777499	1	1	1.38163	0.367732	1.38163	1.0139	57.6754
CG8757	0	1	46	46	6.82e-13	1.38e-12	47	0	20	20	0	1	2.1e-05	5.74e-06	0.525461	0.143246	1	0	-5.52356	-4.32193	5.52356	1.20163	82.1324
CG7200	210	210	87	87	6.81e-13	1.38e-12	297	243	54	54	224	224	8.98e-26	5.79e-26	0.00659585	0.00258904	1	1	1.2713	2.05247	1.2713	0.781165	61.9402
CG12338	1706	1706	1311	1311	6.81e-13	1.38e-12	3017	565	612	612	520	520	0.00681084	0.00151851	1.14171e-09	9.19e-10	1	1	0.37995	-0.23502	0.37995	0.61497	38.189
CG33204	1228	1228	1611	1611	6.97e-13	1.41e-12	2839	328	434	434	302	302	1.29e-06	3.85e-07	0.296027	0.0862659	1	0	-0.391646	-0.523146	0.391646	0.131501	74.8635
CG3762	15990	15990	17300	17300	7.22e-13	1.46e-12	33290	7090	10405	10405	6522	6522	2.35e-197	1.12e-196	1.21339e-91	1.04e-90	1	1	-0.113602	-0.673891	0.113602	0.560289	16.8576
CG7510	1697	1697	2142	2142	7.29e-13	1.47e-12	3839	943	1123	1123	868	868	1.2e-08	4.02e-09	0.676475	0.178792	1	0	-0.335972	-0.371591	0.335972	0.0356191	90.4144
CG33171	745	745	1049	1049	7.47e-13	1.5e-12	1794	237	346	346	218	218	7.88e-08	2.54e-08	0.23864	0.0711474	1	0	-0.493702	-0.666444	0.493702	0.172742	74.0801
CG5576	404	404	635	635	7.81e-13	1.57e-12	1039	197	261	261	182	182	0.000203309	5.19e-05	0.450711	0.125488	1	0	-0.652401	-0.520111	0.652401	0.13229	83.1411
CG3139	844	844	574	574	7.79e-13	1.57e-12	1418	287	430	430	264	264	3.12e-10	1.14e-10	1.72851e-20	2.76e-20	1	1	0.556192	-0.703799	0.556192	1.25999	30.6242
CG8963	1323	1323	979	979	7.95e-13	1.6e-12	2302	1457	633	633	1341	1341	2.97e-58	3.97e-58	2.00662e-12	1.98e-12	1	1	0.434432	1.08303	0.434432	0.6486	40.1126
CG31104	1776	1776	1374	1374	8.41e-13	1.69e-12	3150	494	692	692	455	455	2.69e-12	1.08e-12	3.03871e-22	5.3e-22	1	1	0.37025	-0.604905	0.37025	0.975155	27.5196
CG14865	83	83	203	203	9.14e-13	1.84e-12	286	72	98	98	67	67	0.019242	0.00411634	0.0129646	0.00487312	1	1	-1.2903	-0.548621	1.2903	0.741676	63.4997
CG10988	332	332	543	543	9.79e-13	1.97e-12	875	588	304	304	541	541	3.03e-16	1.43e-16	1.78803e-27	3.89e-27	1	1	-0.709769	0.831557	0.709769	1.54133	31.5299
CG8934	1837	1837	1429	1429	9.98e-13	2e-12	3266	691	448	448	636	636	1.24e-08	4.17e-09	0.167625	0.0516565	1	0	0.362346	0.505528	0.362346	0.143182	71.6767
CG5467	739	739	489	489	1.01e-12	2.02e-12	1228	361	305	305	333	333	0.285088	0.0525967	0.00111609	0.000486564	1	1	0.59574	0.126713	0.59574	0.469027	55.9503
CG34164	630	630	401	401	1.01e-12	2.02e-12	1031	1082	293	293	996	996	8.04e-90	1.65e-89	3.5224e-17	4.69e-17	1	1	0.65175	1.76525	0.65175	1.1135	36.9212
CG9987	455	455	264	264	1.02e-12	2.05e-12	719	600	163	163	552	552	2.87e-50	3.25e-50	9.69391e-09	7.24e-09	1	1	0.785329	1.7598	0.785329	0.974468	44.6261
CG5317	767	767	512	512	1.04e-12	2.08e-12	1279	1342	371	371	1235	1235	2.27e-108	5.67e-108	1.59714e-22	2.83e-22	1	1	0.583083	1.73502	0.583083	1.15194	33.6067
CG7404	905	905	626	626	1.05e-12	2.09e-12	1531	522	313	313	481	481	2.71e-09	9.42e-10	0.504055	0.138085	1	0	0.531755	0.619874	0.531755	0.0881191	85.7844
CG34387	1222	1222	1601	1601	1.04e-12	2.09e-12	2823	351	1075	1075	323	323	1.59e-94	3.47e-94	6.52167e-39	2.12e-38	1	1	-0.389729	-1.73473	0.389729	1.345	22.4663
CG4193	90	90	18	18	1.07e-12	2.13e-12	108	16816	1788	1788	15468	15468	4.940656e-324	4.446591e-323	0.0391588	0.0135203	1	0	2.32193	3.11287	2.32193	0.79094	74.5913
CG14785	18	18	90	90	1.07e-12	2.13e-12	108	38	63	63	35	35	0.00609263	0.0013643	0.00231682	0.000969067	1	1	-2.32193	-0.847997	2.32193	1.47393	61.17
CG11073	2877	2877	2361	2361	1.07e-12	2.13e-12	5238	858	1501	1501	790	790	1.42e-50	1.63e-50	1.34565e-60	7.44e-60	1	1	0.285167	-0.925999	0.285167	1.21117	19.0577
CG9494	1885	1885	1472	1472	1.08e-12	2.16e-12	3357	633	941	941	583	583	4.04e-20	2.2e-20	4.26917e-31	1.06e-30	1	1	0.356787	-0.690699	0.356787	1.04749	25.4072
CG2135	399	399	627	627	1.11e-12	2.22e-12	1026	345	283	283	318	318	0.165421	0.03162	4.07521e-08	2.88e-08	1	1	-0.652077	0.168225	0.652077	0.820301	44.2873
CG11576	1177	1177	856	856	1.15e-12	2.29e-12	2033	586	402	402	540	540	7.78e-06	2.2e-06	0.780132	0.202315	1	0	0.459432	0.425764	0.459432	0.0336677	93.1722
CG31719	1296	1296	958	958	1.15e-12	2.29e-12	2254	290	460	460	267	267	7.92e-13	3.25e-13	1.7497e-22	3.09e-22	1	1	0.435968	-0.784794	0.435968	1.22076	26.315
CG16928	653	653	420	420	1.16e-12	2.31e-12	1073	748	179	179	689	689	3.18e-71	5.13e-71	8.97989e-19	1.3e-18	1	1	0.636694	1.94454	0.636694	1.30785	32.7426
CG1893	903	903	625	625	1.2e-12	2.39e-12	1528	650	298	298	598	598	6.47e-24	3.93e-24	0.000192935	9.28e-05	1	1	0.53087	1.00483	0.53087	0.473963	52.8316
CG8268	437	437	251	251	1.29e-12	2.56e-12	688	489	142	142	450	450	3.04e-38	2.69e-38	1.49422e-06	9.07e-07	1	1	0.799946	1.66403	0.799946	0.864088	48.0727
CG9481	708	708	465	465	1.33e-12	2.65e-12	1173	216	242	242	199	199	0.0453777	0.00931207	4.46969e-08	3.15e-08	1	1	0.606519	-0.282239	0.606519	0.888757	40.5623
CG14106	0	1	45	45	1.34e-12	2.66e-12	46	0	25	25	0	1	8.05e-07	2.44e-07	1	0.246323	1	0	-5.49185	-4.64386	5.49185	0.847997	86.6243
CG7194	45	45	0	1	1.34e-12	2.66e-12	46	65	5	5	60	60	4.87e-13	2.02e-13	0.39768	0.112148	1	0	5.49185	3.58496	5.49185	1.90689	74.2268
CG10650	3977	3977	3369	3369	1.38e-12	2.74e-12	7346	1187	1581	1581	1092	1092	2.93e-21	1.65e-21	5.26837e-32	1.36e-31	1	1	0.23936	-0.533865	0.23936	0.773225	23.6385
CG9000	853	853	1172	1172	1.43e-12	2.84e-12	2025	751	747	747	691	691	0.146925	0.0282986	0.000592444	0.000267691	1	1	-0.458355	-0.112423	0.458355	0.345932	56.989
CG9216	3530	3530	2959	2959	1.44e-12	2.85e-12	6489	1626	1069	1069	1496	1496	3.44e-17	1.69e-17	0.000726341	0.000323899	1	1	0.254558	0.484848	0.254558	0.23029	52.5027
CG8134	437	437	673	673	1.44e-12	2.86e-12	1110	378	367	367	348	348	0.500872	0.0887781	0.000105654	5.23e-05	1	1	-0.622973	-0.0766928	0.622973	0.54628	53.2796
CG9434	219	219	394	394	1.49e-12	2.95e-12	613	412	851	851	379	379	3.88e-42	3.74e-42	0.0348075	0.0121254	1	0	-0.847265	-1.16696	0.847265	0.319697	72.6044
CG18661	61	61	6	6	1.49e-12	2.96e-12	67	31	2	2	29	29	4.63e-07	1.42e-07	1	0.246323	1	0	3.34577	3.85798	3.34577	0.512206	86.7235
CG3560	8644	8644	7738	7738	1.52e-12	3.01e-12	16382	3991	3921	3921	3671	3671	0.0042638	0.00097241	2.17287e-10	1.87e-10	1	1	0.159738	-0.0950485	0.159738	0.254787	38.5353
CG6435	260	260	448	448	1.56e-12	3.09e-12	708	49	205	205	46	46	3.85e-25	2.44e-25	4.31093e-08	3.05e-08	1	1	-0.784987	-2.15592	0.784987	1.37093	36.4108
CG31148	1806	1806	1405	1405	1.57e-12	3.11e-12	3211	111	742	742	103	103	4.46e-120	1.24e-119	3.7992e-128	4.66e-127	1	1	0.362228	-2.84877	0.362228	3.211	10.1373
CG9642	121	121	258	258	1.63e-12	3.22e-12	379	41	111	111	38	38	1.74e-09	6.1e-10	0.170703	0.0525258	1	0	-1.09236	-1.54649	1.09236	0.454124	70.6351
CG11139	1248	1248	919	919	1.67e-12	3.31e-12	2167	876	403	403	806	806	1.78e-31	1.35e-31	2.11932e-07	1.4e-07	1	1	0.441481	1	0.441481	0.558519	44.1481
CG14042	295	295	147	147	1.69e-12	3.34e-12	442	100	77	77	92	92	0.281478	0.0519834	0.0063889	0.00251384	1	1	1.0049	0.256775	1.0049	0.748123	57.3238
CG17838	475	475	281	281	1.69e-12	3.35e-12	756	134	117	117	124	124	0.699216	0.120375	0.00194253	0.000821329	1	1	0.757357	0.0838316	0.757357	0.673526	52.9294
CG3638	1794	1794	1395	1395	1.7e-12	3.36e-12	3189	1177	518	518	1083	1083	4.64e-46	4.85e-46	2.18582e-14	2.46e-14	1	1	0.362915	1.06401	0.362915	0.701094	34.1082
CG31097	138	138	44	44	1.71e-12	3.37e-12	182	42	16	16	39	39	0.00266726	0.000619393	0.481757	0.132717	1	0	1.64909	1.2854	1.64909	0.363691	81.931
CG2929	511	511	309	309	1.73e-12	3.42e-12	820	523	193	193	482	482	1.98e-29	1.42e-29	0.000225425	0.000107684	1	1	0.725716	1.32043	0.725716	0.594716	54.9605
CG34325	662	662	429	429	1.79e-12	3.52e-12	1091	289	231	231	266	266	0.127147	0.0246831	0.00837084	0.00323916	1	1	0.625854	0.203533	0.625854	0.42232	59.709
CG5872	657	657	425	425	1.8e-12	3.54e-12	1082	412	236	236	379	379	8.86e-09	3e-09	0.71736	0.188177	1	0	0.628431	0.683411	0.628431	0.0549805	91.955
CG12665	71	71	10	10	1.8e-12	3.54e-12	81	47	13	13	44	44	4.71e-05	1.25e-05	0.111972	0.0357127	1	0	2.82782	1.75899	2.82782	1.06883	72.5706
CG10062	559	559	821	821	1.83e-12	3.61e-12	1380	251	349	349	231	231	1.09e-06	3.28e-07	0.800961	0.206756	1	0	-0.554534	-0.595334	0.554534	0.0408002	93.1467
CG32982	622	622	397	397	1.85e-12	3.64e-12	1019	140	155	155	129	129	0.137809	0.0266301	3.56715e-06	2.08e-06	1	1	0.647776	-0.264897	0.647776	0.912673	41.5121
CG6701	1083	1083	1437	1437	1.88e-12	3.69e-12	2520	1441	808	808	1326	1326	2.39e-29	1.71e-29	6.19241e-39	2.02e-38	1	1	-0.408027	0.714654	0.408027	1.12268	26.6561
CG32714	1198	1198	877	877	1.94e-12	3.81e-12	2075	661	419	419	608	608	4.04e-09	1.39e-09	0.439458	0.122801	1	0	0.449979	0.537121	0.449979	0.0871419	83.7761
CG14722	840	840	575	575	1.94e-12	3.82e-12	1415	1126	427	427	1036	1036	1.35e-58	1.82e-58	1.2931e-10	1.13e-10	1	1	0.546827	1.27872	0.546827	0.731889	42.7638
CG4979	190	190	76	76	1.95e-12	3.83e-12	266	43	42	42	40	40	0.912157	0.153025	0.000277215	0.000130996	1	1	1.32193	-0.0703893	1.32193	1.39232	48.7033
CG4111	7643	7643	8539	8539	1.96e-12	3.84e-12	16182	7395	5204	5204	6802	6802	2.96e-48	3.23e-48	2.68735e-55	1.32e-54	1	1	-0.159928	0.386338	0.159928	0.546266	22.6465
CG11198	21689	21689	23180	23180	2e-12	3.91e-12	44869	5984	12261	12261	5505	5505	4.940656e-324	4.446591e-323	0	0	1	1	-0.095917	-1.15526	0.095917	1.05935	8.30262
CG10565	1779	1779	1383	1383	2.01e-12	3.95e-12	3162	2337	947	947	2150	2150	3.58e-106	8.68e-106	4.85188e-27	1.03e-26	1	1	0.363265	1.1829	0.363265	0.819635	30.7097
CG15545	80	80	14	14	2.12e-12	4.15e-12	94	24	0	1	23	23	2.98e-06	8.67e-07	0.300184	0.0874255	1	0	2.51457	4.52356	2.51457	2.00899	55.5883
CG1009	3654	3654	3077	3077	2.14e-12	4.19e-12	6731	1820	1111	1111	1675	1675	9.86e-27	6.55e-27	1.78127e-07	1.19e-07	1	1	0.247952	0.592302	0.247952	0.34435	41.8624
CG6751	663	663	431	431	2.39e-12	4.67e-12	1094	998	351	351	918	918	7.96e-59	1.08e-58	1.78038e-09	1.41e-09	1	1	0.621321	1.38702	0.621321	0.765702	44.7953
CG2254	6172	6172	5417	5417	2.44e-12	4.78e-12	11589	1430	2202	2202	1316	1316	7.22e-51	8.33e-51	2.46798e-61	1.39e-60	1	1	0.188244	-0.742655	0.188244	0.930899	16.8204
CG2816	57	57	159	159	2.46e-12	4.81e-12	216	11	52	52	11	11	1.67e-07	5.31e-08	0.182376	0.0557961	1	0	-1.47999	-2.24101	1.47999	0.761015	66.0414
CG17042	442	442	257	257	2.56e-12	5.01e-12	699	88	78	78	81	81	0.87404	0.147278	0.00515177	0.00205807	1	1	0.782278	0.0544478	0.782278	0.72783	51.8028
CG5170	9110	9110	8189	8189	2.63e-12	5.13e-12	17299	7885	4226	4226	7253	7253	1.48e-177	6.33e-177	4.04328e-70	2.63e-69	1	1	0.153764	0.779285	0.153764	0.625521	19.7314
CG30142	161	161	313	313	2.65e-12	5.17e-12	474	59	182	182	55	55	4.57e-17	2.23e-17	0.00327395	0.00134019	1	1	-0.959102	-1.72643	0.959102	0.767333	55.5539
CG9148	1504	1504	1913	1913	2.79e-12	5.45e-12	3417	941	503	503	866	866	7.45e-23	4.39e-23	1.85861e-33	5e-33	1	1	-0.347032	0.783809	0.347032	1.13084	23.4819
CG14215	505	505	306	306	2.8e-12	5.47e-12	811	851	356	356	783	783	2.21e-37	1.92e-37	0.0030872	0.00126797	1	1	0.722752	1.13714	0.722752	0.414383	63.559
CG11856	1958	1958	1544	1544	2.81e-12	5.48e-12	3502	4923	1655	1655	4529	4529	1.13e-303	8.68e-303	6.41396e-67	4e-66	1	1	0.342708	1.45236	0.342708	1.10965	23.5966
CG13695	492	492	296	296	2.91e-12	5.67e-12	788	150	204	204	138	138	0.000424043	0.000105241	9.13076e-12	8.57e-12	1	1	0.733061	-0.563901	0.733061	1.29696	36.111
CG7425	5798	5798	5070	5070	3.03e-12	5.91e-12	10868	3730	2188	2188	3431	3431	3.74e-62	5.24e-62	2.7352e-21	4.53e-21	1	1	0.19357	0.649016	0.19357	0.455447	29.8251
CG34042	5	5	57	57	3.07e-12	5.97e-12	62	4	80	80	4	4	2.1e-19	1.12e-19	0.49538	0.135982	1	0	-3.51096	-4.32193	3.51096	0.810966	81.236
CG5150	1313	1313	1696	1696	3.1e-12	6.03e-12	3009	752	991	991	692	692	3.27e-13	1.37e-13	0.0966949	0.0312044	1	0	-0.369269	-0.518113	0.369269	0.148844	71.272
CG6382	1965	1965	1551	1551	3.1e-12	6.03e-12	3516	2768	1131	1131	2547	2547	1.66e-123	4.73e-123	9.20243e-32	2.34e-31	1	1	0.341331	1.1712	0.341331	0.829869	29.1437
CG5454	219	219	391	391	3.19e-12	6.19e-12	610	242	173	173	223	223	0.0137021	0.00297421	2.43666e-10	2.09e-10	1	1	-0.836238	0.366272	0.836238	1.20251	41.0172
CG1441	650	650	422	422	3.43e-12	6.66e-12	1072	167	90	90	154	154	5.02e-05	1.34e-05	0.512781	0.140101	1	0	0.623197	0.774933	0.623197	0.151737	80.4194
CG5770	306	306	504	504	3.5e-12	6.8e-12	810	46	561	561	43	43	4.49e-116	1.21e-115	3.05654e-44	1.19e-43	1	1	-0.719892	-3.70559	0.719892	2.9857	19.4272
CG5976	362	362	575	575	3.52e-12	6.83e-12	937	177	244	244	163	163	6.96e-05	1.84e-05	0.626996	0.16719	1	0	-0.667572	-0.582009	0.667572	0.0855631	88.6391
CG31100	669	669	949	949	3.57e-12	6.93e-12	1618	210	394	394	194	194	1.16e-16	5.56e-17	0.000379105	0.000176039	1	1	-0.504402	-1.02214	0.504402	0.517737	49.3477
CG4089	254	254	120	120	3.61e-12	7e-12	374	103	51	51	95	95	0.000339448	8.5e-05	0.534994	0.145503	1	0	1.08179	0.89743	1.08179	0.184364	85.4391
CG13056	113	113	31	31	3.71e-12	7.18e-12	144	17	7	7	16	16	0.0931397	0.0183832	0.420931	0.118094	1	0	1.86598	1.19265	1.86598	0.673338	73.4836
CG15414	281	281	139	139	3.76e-12	7.27e-12	420	65	33	33	60	60	0.00669502	0.0014939	0.715917	0.187825	1	0	1.01549	0.862496	1.01549	0.152989	86.907
CG12162	1833	1833	2279	2279	3.75e-12	7.27e-12	4112	768	1008	1008	707	707	3.8e-13	1.58e-13	0.0189068	0.00690166	1	0	-0.314194	-0.511714	0.314194	0.197519	61.4004
CG1506	259	259	443	443	3.75e-12	7.27e-12	702	91	328	328	84	84	3.83e-35	3.19e-35	6.26686e-09	4.74e-09	1	1	-0.774355	-1.96523	0.774355	1.19088	39.4027
CG13887	2969	2969	3529	3529	3.95e-12	7.65e-12	6498	1325	1290	1290	1219	1219	0.162254	0.0310579	0.0142593	0.00532307	1	0	-0.249282	-0.0816729	0.249282	0.167609	59.7955
CG11680	756	756	509	509	3.97e-12	7.68e-12	1265	690	346	346	635	635	2e-20	1.1e-20	0.0179731	0.00659218	1	0	0.570721	0.875985	0.570721	0.305264	65.1519
CG10806	1531	1531	1170	1170	4e-12	7.74e-12	2701	555	789	789	511	511	1.24e-14	5.5e-15	7.11894e-25	1.41e-24	1	1	0.387966	-0.626702	0.387966	1.01467	27.6598
CG18171	169	169	64	64	4.13e-12	7.96e-12	233	112	42	42	104	104	2.99e-07	9.36e-08	0.814563	0.209585	1	0	1.40088	1.30812	1.40088	0.0927571	93.7898
CG8591	401	401	623	623	4.12e-12	7.96e-12	1024	510	489	489	470	470	0.561094	0.0986224	1.11273e-05	6.14e-06	1	1	-0.63563	-0.0571737	0.63563	0.578456	52.3546
CG16707	6263	6263	5510	5510	4.12e-12	7.96e-12	11773	4059	2472	2472	3734	3734	4.66e-58	6.19e-58	3.3914e-19	5.02e-19	1	1	0.184802	0.595043	0.184802	0.410242	31.0568
CG33748	264	264	449	449	4.23e-12	8.16e-12	713	172	240	240	159	159	5.87e-05	1.56e-05	0.367609	0.104569	1	0	-0.766178	-0.594008	0.766178	0.17217	81.6518
CG17870	2100	2100	2574	2574	4.38e-12	8.44e-12	4674	943	1291	1291	868	868	8.16e-20	4.4e-20	0.000262812	0.000124622	1	1	-0.293623	-0.572722	0.293623	0.279099	51.2679
CG10372	1387	1387	1777	1777	4.38e-12	8.45e-12	3164	1089	924	924	1002	1002	0.0793115	0.0157981	1.60523e-08	1.18e-08	1	1	-0.357476	0.116918	0.357476	0.474394	42.9726
CG3893	43	43	134	134	4.43e-12	8.53e-12	177	173	73	73	160	160	1.2e-08	4.03e-09	1.9351e-19	2.9e-19	1	1	-1.63982	1.1321	1.63982	2.77193	37.1695
CG12084	793	793	1094	1094	4.5e-12	8.66e-12	1887	661	612	612	608	608	0.931559	0.156057	2.16339e-05	1.16e-05	1	1	-0.46422	-0.00946033	0.46422	0.45476	50.5147
CG31436	206	206	88	88	4.61e-12	8.86e-12	294	51	60	60	47	47	0.245891	0.0458858	2.45685e-06	1.45e-06	1	1	1.22707	-0.352302	1.22707	1.57937	43.7233
CG2989	1242	1242	920	920	4.64e-12	8.92e-12	2162	261	353	353	241	241	4.94e-06	1.42e-06	3.33417e-13	3.51e-13	1	1	0.432959	-0.550635	0.432959	0.983594	30.5643
CG6004	6847	6847	7681	7681	4.75e-12	9.13e-12	14528	5490	5472	5472	5050	5050	4.05e-05	1.08e-05	0.178365	0.0546779	1	0	-0.165822	-0.115785	0.165822	0.0500373	76.8195
CG3091	1874	1874	1474	1474	5.06e-12	9.73e-12	3348	602	734	734	554	554	5.87e-07	1.8e-07	2.89885e-15	3.43e-15	1	1	0.346384	-0.405894	0.346384	0.752279	31.5278
CG18217	43	43	0	1	5.12e-12	9.82e-12	44	51	0	1	47	47	3.48e-13	1.46e-13	1	0.246323	1	0	5.42626	5.55459	5.42626	0.128324	97.6898
CG7978	1120	1120	816	816	5.19e-12	9.96e-12	1936	397	443	443	366	366	0.00750167	0.00166687	1.76724e-09	1.4e-09	1	1	0.456858	-0.275463	0.456858	0.732321	38.4179
CG5809	1706	1706	2134	2134	5.29e-12	1.01e-11	3840	1020	1139	1139	939	939	1.25e-05	3.48e-06	0.583894	0.157065	1	0	-0.322943	-0.278571	0.322943	0.0443718	87.9199
CG40049	198	198	83	83	5.28e-12	1.01e-11	281	114	59	59	105	105	0.000408176	0.000101487	0.171386	0.0527098	1	0	1.25432	0.831602	1.25432	0.422715	74.7939
CG7120	488	488	295	295	5.35e-12	1.03e-11	783	354	189	189	326	326	1.66e-09	5.86e-10	0.725314	0.190067	1	0	0.726166	0.786486	0.726166	0.0603195	92.3305
CG9858	732	732	1021	1021	5.43e-12	1.04e-11	1753	371	606	606	342	342	8.15e-18	4.09e-18	0.00395419	0.00160102	1	1	-0.480067	-0.825321	0.480067	0.345254	58.1673
CG8485	733	733	1022	1022	5.58e-12	1.07e-11	1755	542	747	747	499	499	2.22e-12	8.93e-13	0.346866	0.0994287	1	0	-0.47951	-0.582068	0.47951	0.102558	82.3804
CG8182	482	482	721	721	5.81e-12	1.11e-11	1203	622	339	339	573	573	8.65e-15	3.86e-15	2.42004e-25	4.87e-25	1	1	-0.580966	0.75725	0.580966	1.33822	30.2715
CG6868	53	53	4	4	5.91e-12	1.13e-11	57	39	0	1	36	36	5.53e-10	2e-10	0.644984	0.171413	1	0	3.72792	5.16993	3.72792	1.442	72.1078
CG40485	700	700	465	465	6.04e-12	1.16e-11	1165	294	204	204	271	271	0.0024241	0.000565242	0.268137	0.0790392	1	0	0.590124	0.409724	0.590124	0.180401	76.5873
CG3291	734	734	493	493	6.28e-12	1.2e-11	1227	892	273	273	821	821	3.39e-64	4.92e-64	5.90681e-15	6.86e-15	1	1	0.574192	1.58848	0.574192	1.01429	36.1473
CG7324	2614	2614	2140	2140	6.62e-12	1.26e-11	4754	1659	1293	1293	1526	1526	1.23e-05	3.43e-06	0.473907	0.130878	1	0	0.288648	0.239033	0.288648	0.0496157	85.3323
CG31103	686	686	965	965	6.99e-12	1.33e-11	1651	265	627	627	244	244	1.38e-39	1.26e-39	1.55088e-11	1.44e-11	1	1	-0.49232	-1.36158	0.49232	0.869264	36.1579
CG3821	2433	2433	2936	2936	7.08e-12	1.35e-11	5369	2118	1395	1395	1949	1949	9.27e-22	5.29e-22	4.81413e-32	1.25e-31	1	1	-0.271116	0.482469	0.271116	0.753585	26.458
CG13410	660	660	934	934	7.16e-12	1.37e-11	1594	310	284	284	286	286	0.966595	0.161449	0.000326297	0.000152894	1	1	-0.500957	0.0101242	0.500957	0.511081	49.4998
CG9115	720	720	1005	1005	7.22e-12	1.38e-11	1725	653	498	498	601	601	0.00207839	0.000487886	2.07104e-11	1.9e-11	1	1	-0.481127	0.271219	0.481127	0.752346	39.0059
CG7896	1031	1031	1367	1367	7.28e-12	1.39e-11	2398	256	566	566	236	236	4.4e-32	3.4e-32	6.89519e-12	6.52e-12	1	1	-0.406969	-1.26202	0.406969	0.855046	32.2475
CG31558	704	704	986	986	7.34e-12	1.4e-11	1690	130	202	202	120	120	5.7e-06	1.63e-06	0.155007	0.0481111	1	0	-0.486012	-0.751321	0.486012	0.265309	64.6877
CG11555	224	224	101	101	7.42e-12	1.41e-11	325	299	87	87	276	276	4.97e-24	3.04e-24	0.0398718	0.013751	1	0	1.14914	1.66558	1.14914	0.516438	68.9936
CG5974	489	489	297	297	7.58e-12	1.44e-11	786	266	194	194	245	245	0.016917	0.00363602	0.0288367	0.0101856	1	0	0.719372	0.336725	0.719372	0.382646	65.2777
CG8734	85	85	200	200	7.57e-12	1.44e-11	285	135	79	79	125	125	0.00156516	0.000370373	4.77841e-12	4.59e-12	1	1	-1.23447	0.662004	1.23447	1.89647	39.428
CG7881	555	555	808	808	7.64e-12	1.45e-11	1363	144	752	752	133	133	1.6e-105	3.86e-105	2.8019e-40	9.44e-40	1	1	-0.541868	-2.49931	0.541868	1.95744	21.6807
CG12934	88	88	19	19	8.48e-12	1.61e-11	107	30	24	24	28	28	0.677809	0.116923	0.000262165	0.000124339	1	1	2.2115	0.222392	2.2115	1.98911	52.6471
CG5056	274	274	136	136	8.48e-12	1.61e-11	410	379	88	88	349	349	7.64e-38	6.69e-38	1.77427e-05	9.6e-06	1	1	1.01057	1.98765	1.01057	0.977082	50.8424
CG12204	189	189	347	347	8.47e-12	1.61e-11	536	193	166	166	178	178	0.55319	0.0973686	1.7837e-06	1.07e-06	1	1	-0.876549	0.100694	0.876549	0.977243	47.2841
CG5413	2620	2620	2148	2148	8.7e-12	1.65e-11	4768	649	677	677	597	597	0.0268373	0.00566154	2.98523e-07	1.94e-07	1	1	0.286573	-0.181425	0.286573	0.467998	37.9783
CG4447	299	299	154	154	8.88e-12	1.68e-11	453	251	70	70	231	231	3.01e-21	1.69e-21	0.00152497	0.000652875	1	1	0.957215	1.72247	0.957215	0.765251	55.5724
CG1152	245	245	421	421	9.09e-12	1.72e-11	666	57	178	178	53	53	5.51e-17	2.67e-17	9.75202e-05	4.85e-05	1	1	-0.781038	-1.74781	0.781038	0.966774	44.6866
CG3520	137	137	275	275	9.56e-12	1.81e-11	412	112	150	150	104	104	0.0046536	0.0010553	0.0467634	0.0159574	1	0	-1.00526	-0.528379	1.00526	0.476877	67.825
CG9762	6674	6674	7485	7485	9.83e-12	1.86e-11	14159	3134	3858	3858	2883	2883	1.44e-32	1.12e-32	3.08666e-09	2.39e-09	1	1	-0.165451	-0.420282	0.165451	0.254832	39.3665
CG4128	286	286	145	145	1.02e-11	1.93e-11	431	106	92	92	98	98	0.716905	0.123055	0.000638846	0.000287441	1	1	0.979962	0.0911479	0.979962	0.888814	52.4387
CG4213	3354	3354	2819	2819	1.04e-11	1.97e-11	6173	550	501	501	506	506	0.8997	0.151167	0.0170173	0.006265	1	0	0.250699	0.0143268	0.250699	0.236372	51.4707
CG10951	29	29	107	107	1.05e-11	1.99e-11	136	13	75	75	12	12	2.71e-12	1.09e-12	0.214416	0.0645754	1	0	-1.88349	-2.64386	1.88349	0.76037	71.2401
CG17914	643	643	421	421	1.05e-11	1.99e-11	1064	195	243	243	180	180	0.0025329	0.000589775	5.27547e-10	4.38e-10	1	1	0.610999	-0.432959	0.610999	1.04396	36.9193
CG13283	137	137	46	46	1.07e-11	2.02e-11	183	109	10	10	101	101	4.4e-20	2.39e-20	0.000652461	0.000293029	1	1	1.57447	3.33628	1.57447	1.76181	47.1923
CG9090	4908	4908	4257	4257	1.1e-11	2.08e-11	9165	1847	1691	1691	1699	1699	0.904307	0.151833	0.000667875	0.000299022	1	1	0.205298	0.00680919	0.205298	0.198489	50.8432
CG33101	1047	1047	1382	1382	1.14e-11	2.15e-11	2429	679	553	553	625	625	0.0385344	0.00798657	2.20793e-08	1.6e-08	1	1	-0.400496	0.176577	0.400496	0.577073	40.9686
CG9192	79	79	15	15	1.15e-11	2.17e-11	94	63	0	1	58	58	2.08e-16	9.89e-17	0.00520733	0.00207926	1	1	2.39689	5.85798	2.39689	3.46109	40.9167
CG4145	16974	16974	15746	15746	1.17e-11	2.2e-11	32720	6560	4558	4558	6034	6034	9.9e-47	1.04e-46	6.70981e-20	1.04e-19	1	1	0.108341	0.404714	0.108341	0.296373	26.7698
CG6525	851	851	593	593	1.19e-11	2.25e-11	1444	1087	417	417	1000	1000	1.72e-55	2.18e-55	7.83374e-11	6.93e-11	1	1	0.521127	1.26188	0.521127	0.740754	41.2976
CG3088	1962	1962	2411	2411	1.2e-11	2.26e-11	4373	1175	1207	1207	1081	1081	0.00895384	0.00197539	0.065955	0.0219629	1	0	-0.297307	-0.159059	0.297307	0.138247	68.2594
CG9160	3671	3671	4276	4276	1.21e-11	2.28e-11	7947	1563	1993	1993	1438	1438	2.58e-21	1.45e-21	2.55099e-05	1.36e-05	1	1	-0.220089	-0.470878	0.220089	0.250789	46.7401
CG8366	202	202	363	363	1.23e-11	2.32e-11	565	175	220	220	161	161	0.00291501	0.000674827	0.0480874	0.0163819	1	0	-0.845614	-0.450443	0.845614	0.395171	68.1515
[truncated: 7,968 more rows]
