# Supplementary material for: Regulatory divergence in Drosophila revealed by mRNA-seq
Source: HighWire-hosted journal article supplement (doi:10.1101/gr.102491.109), 2010-03-30
Supplement: Supp_TableS3_Revised.docx [file Supp_TableS3_Revised.docx]

Table S3. Summary of Gene Sorting at different significance levels

| q-value  cutoff | *cis* only | *trans* only | *cis* + *trans* | *cis* x *trans* | Compensatory | Conserved | Genes Classified |
| --- | --- | --- | --- | --- | --- | --- | --- |
| < 0.005 | 1,234  (12.4%) | 2,986  (30.0%) | 1,461  (16.4%) | 1,429  (16.0%) | 583  (5.9%) | 1,222  (12.3%) | 8,915 (89.5%) |
| < 0.01 | 1,210  (12.1%) | 3,017  (30.3%) | 1,641  (18.1%) | 1,621  (17.9%) | 580  (5.8%) | 978  (9.8%) | 9,047  (90.8%) |
| < 0.05 | 1,109  (11.1%) | 2,705  (27.1%) | 2,287  (24.2%) | 1,946 (25.7%) | 487  (4.9%) | 443  (4.4%) | 9,459  (94.9%) |
