# Supplementary material for: Regulatory divergence in Drosophila revealed by mRNA-seq
Source: HighWire-hosted journal article supplement (doi:10.1101/gr.102491.109), 2010-03-30
Supplement: Supp_TableS4_Revised.docx [file Supp_TableS4_Revised.docx]

Table S4. Summary of Gene Sorting at different expression level thresholds

| Read-hit  threshold | *cis* only | *trans* only | *cis* + *trans* | *cis* x *trans* | Compensatory | Conserved | Genes Classified | Total |
| --- | --- | --- | --- | --- | --- | --- | --- | --- |
| >= 20 | 1,234  (12.4%) | 2,986  (30.0%) | 1,461  (16.4%) | 1,429  (16.0%) | 583  (5.9%) | 1,222  (12.3%) | 8,915  (89.5%) | 9,966 |
| >= 50 | 1,103  (11.9%) | 2,977  (32.1%) | 1,514  (16.3%) | 1,478  (15.9%) | 542  (5.8%) | 851  (9.2%) | 8,465  (91.3%) | 9,269 |
| >= 100 | 965  (11.3%) | 2,828  (33.1%) | 1,537  (18.0%) | 1,484  (17.4%) | 508  (5.9%) | 605  (7.1%) | 7,927  (92.7%) | 8,552 |
| >= 200 | 794  (10.5%) | 2,534  (33.6%) | 1,526  (20.2%) | 1,446  (19.2%) | 427  (5.7%) | 384  (5.1%) | 7,111  (94.2%) | 7,549 |

This table shows the number and percentage of genes classified into each regulatory divergence category for different minimum read-hit thresholds (FDR rate 0.5%). The frequencies of each category are stable at these expression levels, with the exception of the “conserved” category. At higher expression levels, smaller read-hit differences are considered statistically significant, reducing the total number of “conserved” category genes.
